# Supplementary material for: π-Aggregation-free, fused perylene pentamers: synthesis, narrowband far-red to near-infrared emission, and chiroptical properties
Source: Royal Society of Chemistry journal article supplement (doi:10.1039/d6sc00676k), 2026-04-30
Supplement: d6sc00676k1.pdf [file d6sc00676k1.pdf]

*Supporting Information*

**Table of Contents**

|                                                                    |     |
|--------------------------------------------------------------------|-----|
| 1. Experimental section.....                                       | S2  |
| 1.1 General.....                                                   | S2  |
| 1.2 Synthetic procedures and characterization data.....            | S3  |
| 2. Additional spectra and data.....                                | S11 |
| 3. Chiral HPLC analysis and chiroptical spectra.....               | S21 |
| 4. DFT calculations.....                                           | S24 |
| 5. X-ray crystallographic analysis.....                            | S39 |
| 6. References.....                                                 | S48 |
| 7. Appendix I: NMR and HR mass spectra of all new compounds.....   | S50 |
| 8. Appendix II: Cartesian Coordinates of optimized structures..... | S70 |

## 1. Experimental Section

### 1.1 General

The starting materials and all reagents were obtained from commercial suppliers and used without further purification unless otherwise noted. Compounds **2**<sup>[1]</sup> and **5**<sup>[2]</sup> were synthesized according to the procedures reported in the literature. Unless otherwise noted, all reactions were performed under an argon atmosphere in oven-dried glassware with standard vacuum-line techniques. All work-up and purification procedures were carried out with reagent-grade solvents in the air.

NMR spectra were recorded in deuterated solvents on a Bruker AVANCE 400 NMR Spectrometer (<sup>1</sup>H 400 MHz, <sup>13</sup>C 100 MHz), a Bruker AVIII 500WB NMR Spectrometer (<sup>1</sup>H 500 MHz, <sup>13</sup>C 125 MHz) or a Bruker AVNEO 600 NMR Spectrometer (<sup>1</sup>H 600 MHz, <sup>13</sup>C 150 MHz). All chemical shifts are quoted in ppm, relative to the signals corresponding to the residual non-deuterated solvents CH<sub>2</sub>Cl<sub>2</sub> ( $\delta_{\text{H}} = 5.32$  ppm,  $\delta_{\text{C}} = 53.8$  ppm) or C<sub>6</sub>H<sub>6</sub> ( $\delta_{\text{H}} = 7.16$  ppm,  $\delta_{\text{C}} = 128.1$  ppm). Coupling constants (*J*) are given in Hz and the following abbreviations have been used to describe the signals: singlet (s); doublet (d); doublet of doublets (dd); triplet (t); multiplet (m). High-resolution mass (HR-MS) spectra were recorded on an Agilent 6546 Q-TOF LCMS instrument (for APCI) or a JEOL JMS-S3000 Sprial-TOF MS instrument (for MALDI).

Absorption spectra were recorded on a Shimadzu UV-3600 plus UV-Vis-NIR spectrophotometer and time-resolved fluorescence spectroscopic measurements were conducted on a Shimadzu RF-5301PC spectro fluorophotometer. The absolute quantum yields were recorded on a JASCO model FP-8550 spectrofluorometer, equipped with an integrating sphere while fluorescence lifetime measurements were conducted on a Hamamatsu model compact fluorescence lifetime spectrometer C11367 (Quantaaurus-Tau).

Chiral HPLC isolations were conducted on a Shimadzu HPLC System (LC-20AP) equipped with a COSMOSIL Cholester column (2(i.d.) × 25 cm) at room temperature. Circular Dichroism (CD) and Circularly Polarized Luminescence (CPL) spectra were measured on a Chirascan Series Spectrometer (Applied Photophysics Ltd, UK) at room temperature with 10 × 10 mm quartz cells. The following are parameter settings: PMT/1000 V, scan speed 1 nm/s, slit width 20 nm, error range: ±5%.

## 1.2. Synthetic procedures and characterization data

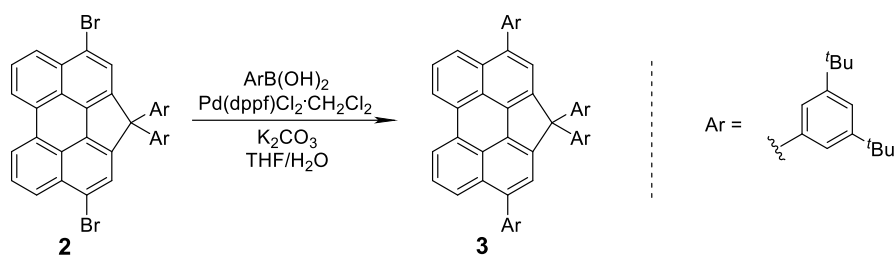

### Synthesis of **3**

To a mixture of compound **2**<sup>[1]</sup> (483 mg, 0.6 mmol), (3,5-di-*tert*-butylphenyl)boronic acid (568 mg, 2.4 mmol),  $\text{Pd(dppf)Cl}_2 \cdot \text{CH}_2\text{Cl}_2$  (49 mg, 0.06 mmol), and  $\text{K}_2\text{CO}_3$  (497 mg, 3.6 mmol) under an argon atmosphere were added THF (20 mL) and  $\text{H}_2\text{O}$  (12 mL), both pre-degassed by bubbling with argon for 20 minutes. The reaction flask was then sealed, and the mixture was heated to 80 °C and stirred overnight. After completion, the reaction mixture was concentrated under reduced pressure. The residue was diluted with DCM and washed with brine. The organic layer was dried over anhydrous  $\text{Na}_2\text{SO}_4$ , filtered, and concentrated under reduced pressure. The crude product was purified by column chromatography on silica gel using DCM/hexane (1:20) as eluent, affording the desired compound **3** (414.8 mg, 68%) as a yellow solid.

**Compound 3:**  $^1\text{H NMR}$  (400 MHz,  $\text{CD}_2\text{Cl}_2$ , 298 K):  $\delta$  ppm 8.22 (d,  $J = 7.0$  Hz, 2H), 7.79 (d,  $J = 8.1$  Hz, 2H), 7.58 (s, 2H), 7.56-7.52 (m, 2H), 7.50 (s, 2H), 7.40 (d,  $J = 1.4$  Hz, 4H), 7.30 (t,  $J = 1.6$  Hz, 2H), 7.24 (d,  $J = 1.7$  Hz, 4H), 1.38 (s, 36H), 1.20 (s, 36H).  $^{13}\text{C NMR}$  (100 MHz,  $\text{CD}_2\text{Cl}_2$ , 298 K): 151.2, 150.8, 142.8, 135.3, 133.2, 127.9, 126.6, 126.0, 124.7, 122.8, 121.4, 121.1, 35.3, 35.2, 31.7, 31.6. HRMS analysis (APCI,  $m/z$ )  $[(\text{M}+\text{H})^+]$  calcd for  $\text{C}_{77}\text{H}_{93}$ : 1017.7272, found 1017.7278 (error: 0.59 ppm).

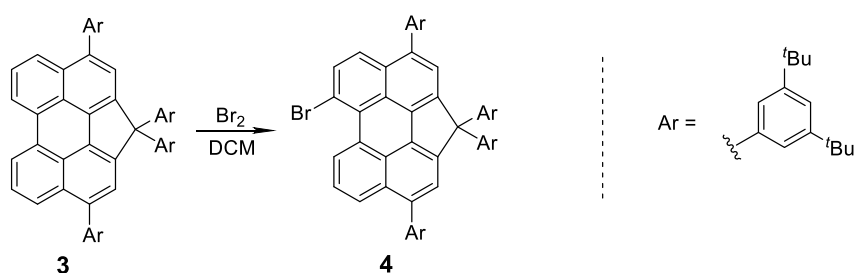

### Synthesis of **4**

To a solution of **3** (341.4 mg, 0.34 mmol) in analytical grade DCM (50 mL), bromine (0.02 mL, 0.4 mmol) was added. The reaction mixture turned deep green without obvious fluorescence upon addition. The mixture was stirred at room temperature for one hour, during

which it exhibited slight fluorescence. Subsequently, the reaction mixture was poured into aq.  $\text{Na}_2\text{S}_2\text{O}_3$  (20 ml), resulting in a yellow solution with bright fluorescence. The organic phase was separated and washed with brine (50 ml), then dried over  $\text{Na}_2\text{SO}_4$ . After solvent evaporation under vacuum, the residue was purified by column chromatography on silica gel using hexane as the eluent, yielding the desired product **4** (297.7 mg, 81%) as a yellow solid.

**Compound 4:**  $^1\text{H}$  NMR (400 MHz,  $\text{CD}_2\text{Cl}_2$ , 298 K):  $\delta$  ppm 9.64 (d,  $J = 7.8$  Hz, 1H), 7.89 (d,  $J = 8.3$  Hz, 1H), 7.75 (d,  $J = 9.1$  Hz, 1H), 7.61 (t,  $J = 7.4$  Hz, 4H), 7.51 (d,  $J = 1.5$  Hz, 2H), 7.38 (dd,  $J = 13.5, 1.7$  Hz, 4H), 7.30 (t,  $J = 1.7$  Hz, 2H), 7.21 (d,  $J = 1.7$  Hz, 4H), 1.38 (d,  $J = 3.0$  Hz, 36H), 1.20 (s, 36H).  $^{13}\text{C}$  NMR (100 MHz,  $\text{CD}_2\text{Cl}_2$ , 298 K): 151.3, 151.2, 150.9, 147.0, 145.9, 142.6, 140.8, 140.5, 140.3, 135.8, 134.5, 134.3, 132.5, 132.4, 131.5, 131.1, 128.9, 127.3, 127.2, 126.4, 126.0, 125.7, 124.9, 124.8, 122.9, 121.6, 121.5, 121.2, 119.3, 35.3, 35.2, 31.7, 31.7, 31.6. HRMS analysis (APCI,  $m/z$ )  $[(\text{M}+\text{H})^+]$  calcd for  $\text{C}_{77}\text{H}_{92}\text{Br}$ : 1095.6377, found 1095.6374 (error: 0.27 ppm).

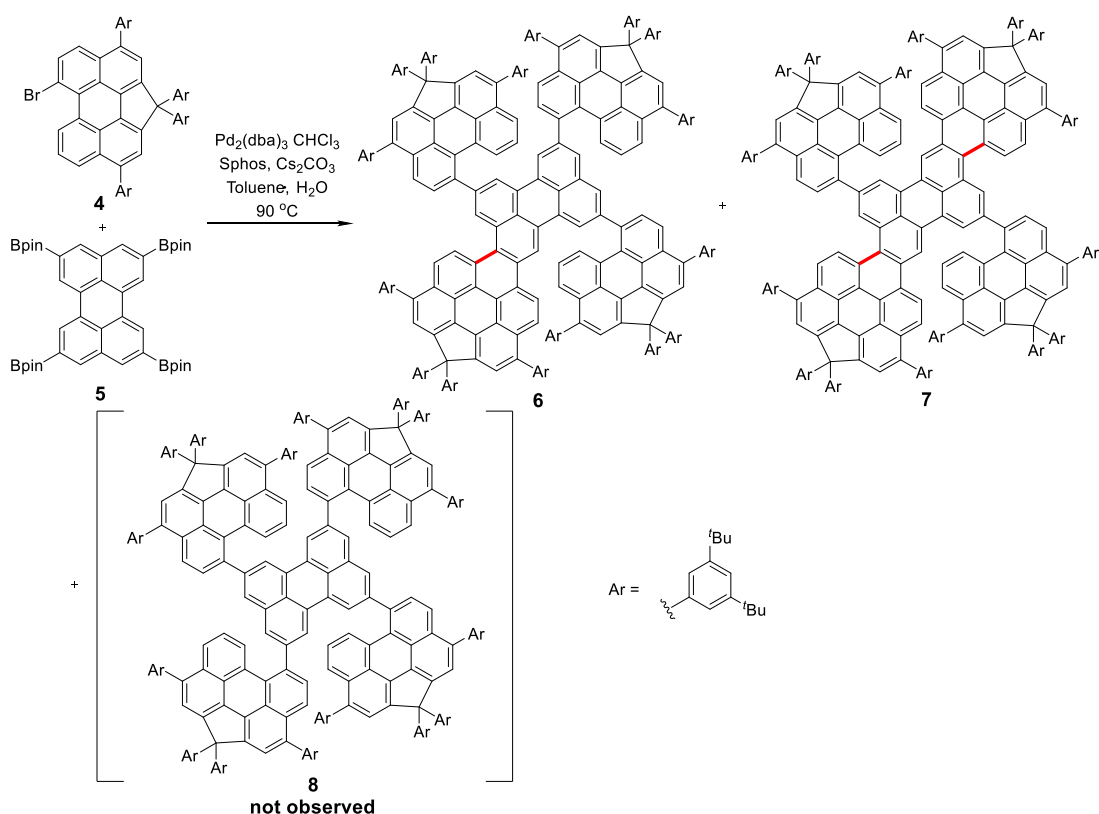

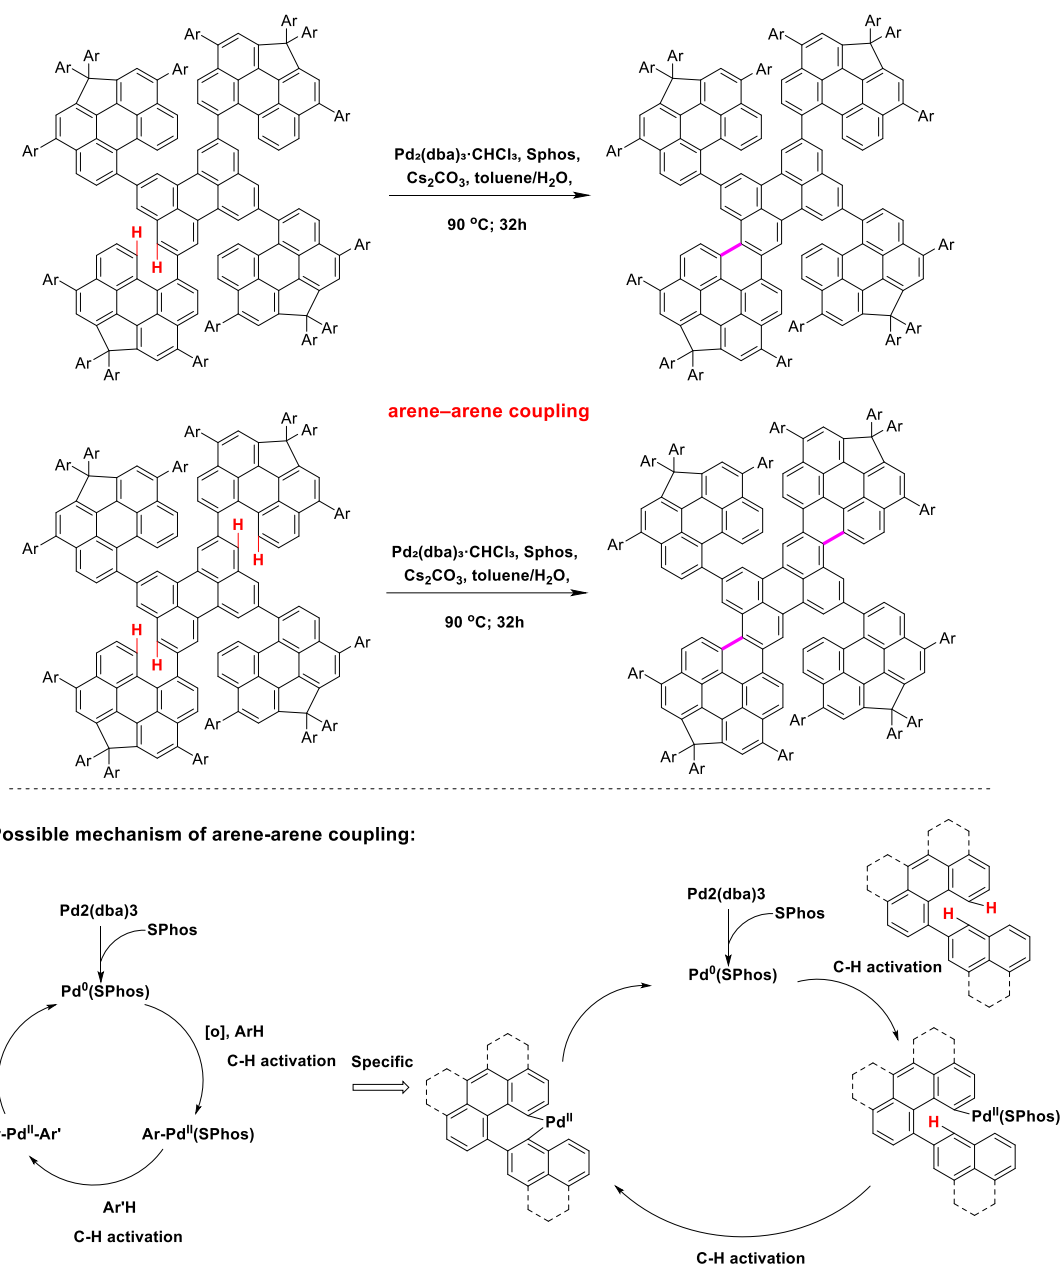

**Fig. S1.** Possible C-H activation procedure for **6** and **7**. **Possible mechanism:** the catalytic cycle is initiated by ligand exchange of  $\text{Pd}_2(\text{dba})_3$  with SPhos, generating an active low-coordinate  $\text{Pd}(0)(\text{SPhos})$  species. Subsequently, C–H activation occurs via a concerted metalation–deprotonation pathway, in which  $\text{Cs}_2\text{CO}_3$  assists deprotonation to form a  $\text{Pd}(\text{II})$ –aryl intermediate. A second C–H activation at a proximal aryl position generates a diaryl– $\text{Pd}(\text{II})$  species, which then undergoes reductive elimination to form the new C–C bond, leading to intramolecular cyclization and formation of the observed pentameric frameworks **6** and **7**. Finally,  $\text{Pd}(0)(\text{SPhos})$  is regenerated, completing the catalytic cycle.

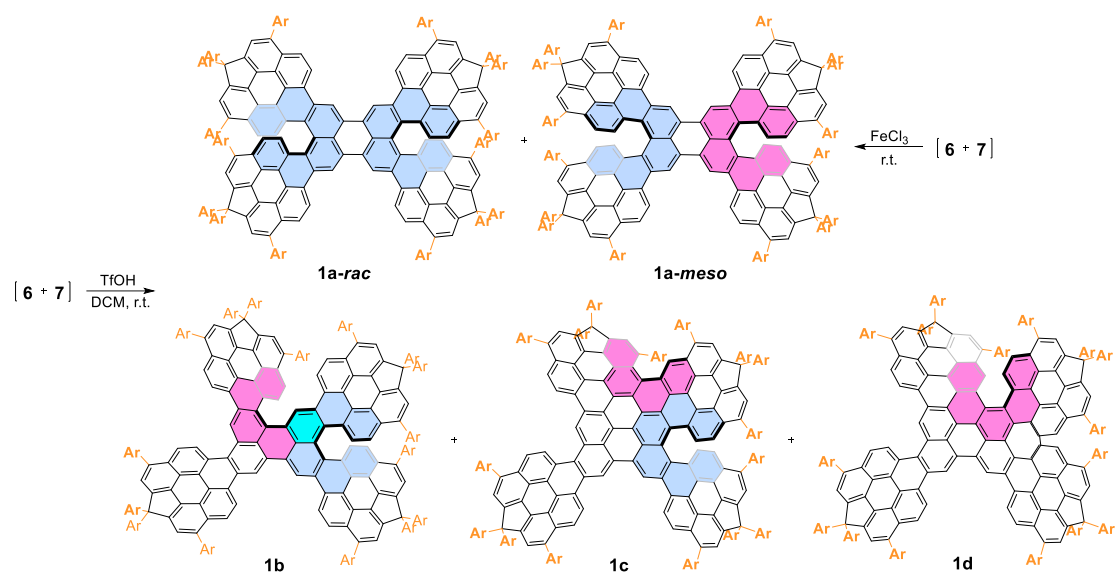

## Synthesis of perylene pentamers

To a Schlenk flask under an argon atmosphere were added compound **4** (1.09 g, 1.0 mmol), compound **5** (75.6 mg, 0.1 mmol), Pd<sub>2</sub>(dba)<sub>3</sub> (41.4 mg, 0.04 mmol), SPhos (32.8 mg, 0.08 mmol), and Cs<sub>2</sub>CO<sub>3</sub> (521.3 mg, 1.6 mmol). The flask was evacuated and backfilled with argon three times, after which degassed toluene/H<sub>2</sub>O (20 mL/10 mL) was injected. The reaction mixture was heated to 90 °C and stirred for 32 h. After cooling to room temperature, water was added, and the mixture was extracted with DCM (3×). The combined organic layers were washed with brine, dried over anhydrous Na<sub>2</sub>SO<sub>4</sub>, and the solvent was removed under reduced pressure. The crude product was first purified by short column chromatography (silica gel, DCM as eluent) to remove catalysts, followed by preparative GPC (CHCl<sub>3</sub>, 14 mL/min) to afford a mixture of compounds **6** and **7** as an orange-yellow solid (99.1 mg, 23%). Compound **8** could not be isolated, while the unexpected formation of **6** and **7** did not affect the subsequent Scholl reaction toward the target compounds; thus, optimization of **8** was not pursued. Due to their similar polarity and the fact that both intermediates can lead to the desired pentamers, the mixture was used directly in the next step without further purification. A small portion of the mixture was subjected to preparative TLC (DCM/Hexane = 1/15), allowing characterization of compound **6** by HRMS and compound **7** by both HRMS and X-ray analysis. **Compound 6**: HRMS (MALDI, 100%, *m/z*) [M<sup>+</sup>] calcd for C<sub>328</sub>H<sub>370</sub>: 4311.9049; found: 4311.5843. **Compound 7**: HRMS (MALDI, *m/z*) [M<sup>+</sup>] calcd for C<sub>328</sub>H<sub>368</sub>: 4306.8791; found: 4306.8715 (error: -1.76 ppm).

**Method I for Scholl reaction:** To a Schlenk flask under an argon atmosphere was added the mixture of compounds **6** and **7** (88 mg, 0.02 mmol), DDQ (23 mg, 0.1 mmol), and DCM (200 mL). The solution was degassed by bubbling argon for 20 min, after which TfOH (0.26

mL, 2.9 mmol) was added dropwise at room temperature. The reaction mixture was stirred for 1.5 h at room temperature, then quenched with Et<sub>3</sub>N (3.0 mL) and H<sub>2</sub>O (50 mL) and stirred for an additional 15 min. The resulting mixture was extracted with DCM/H<sub>2</sub>O, and the combined organic layers were washed sequentially with saturated aqueous NaHCO<sub>3</sub>, H<sub>2</sub>O, and brine, dried over Na<sub>2</sub>SO<sub>4</sub>. The solvent was removed under reduced pressure. The crude product was first purified by preparative GPC (THF, 18 mL/min), which showed only a single peak due to the structural similarity of the final products (Fig. S2). The collected fraction was concentrated and further purified by preparative TLC (hexane/DCM = 15:1), affording four main bands corresponding to crude **1a–1d**. These fractions were not completely separated, with neighboring bands overlapping owing to their similar polarity (Fig. S3). The crude **1a–1d** fractions were subsequently subjected to preparative HPLC (THF/acetone = 20:80, 8 mL/min) using a COSMOSIL Cholester column (2 i.d. × 25 cm) to afford relatively pure **1a–1d**. Each was further purified by preparative TLC (hexane/DCM = 15:1), yielding: **1a** (17.6 mg, 20%) as a red solid, **1b** (16.6 mg, 18.9%) as a black-green solid, **1c** (22.5 mg, 25.6%) as a dark solid, and **1d** (9.0 mg, 10.2%) as a brown-red solid. Compound **1a** was found to consist of a mixture of the **1a-rac** and **1a-meso** isomers. Recrystallization from THF/acetone (1:9) afforded **1a-meso** as the solid, while **1a-rac** remained in the mother liquor and was further purified by HPLC on a COSMOSIL Cholester column to give pure **1a-rac**.

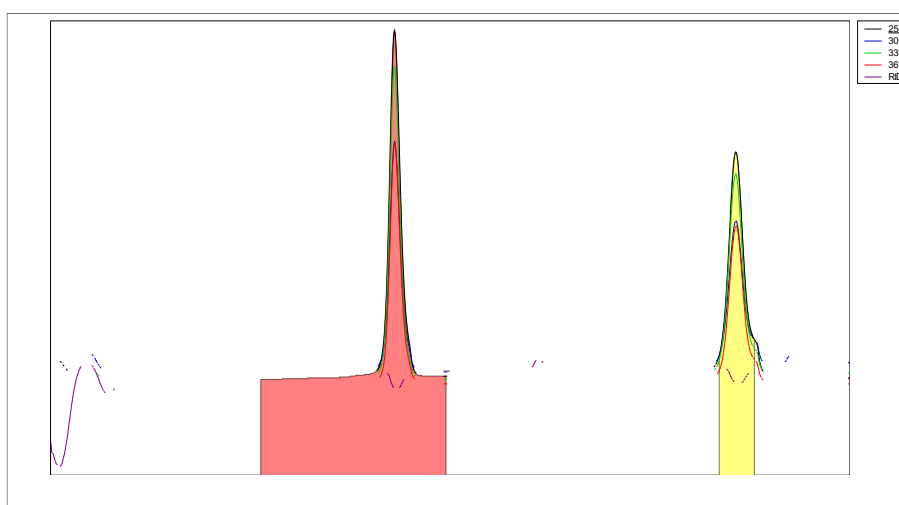

**Fig. S2.** GPC curve of the final products **1a–1d**. Shimazu GPC column K802 (8.0mm id x 30cm), SPD-20AV UV-Vis spectrophotometric detector, and chloroform as eluent.

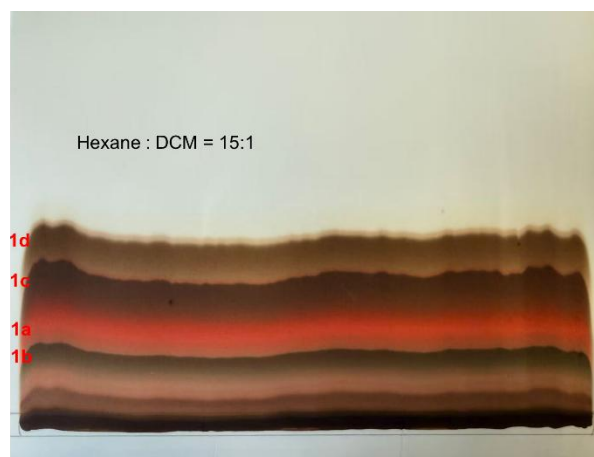

**Fig. S3.** PTLC results of the final products **1a-1d**.

**Method II for Scholl reaction:** To a Schlenk flask under an argon atmosphere was added the mixture of compounds **6** and **7** (20 mg, 0.0046 mmol) in DCM (40 mL). The solution was purged with argon for 15 min, after which a solution of FeCl<sub>3</sub> in MeNO<sub>2</sub> (103 mg, 0.4 mL) was added dropwise at room temperature. The resulting black solution was stirred at room temperature for 1 h under a continuous argon flow. The reaction progress was monitored by TLC. The mixture was then quenched with methanol (1 mL), extracted with DCM/H<sub>2</sub>O, and the combined organic layers were dried over Na<sub>2</sub>SO<sub>4</sub>. The solvent was removed under reduced pressure. The crude product was purified by preparative GPC (THF, 18 mL/min) followed by a short silica gel column (hexane/DCM = 20:1), affording pure **1a** (11.4 mg, 57%) as a red solid. The **1a-rac** and **1a-meso** isomers were separated using the same procedure described in Method I.

**Compound 1a:** <sup>1</sup>H NMR (400 MHz, CD<sub>2</sub>Cl<sub>2</sub>, 298 K): δ ppm 10.86 (s, 2H), 10.74 (s, 2H), 9.75 (d, *J* = 9.8 Hz, 2H), 9.68 (d, *J* = 9.7 Hz, 2H), 8.73 (d, *J* = 9.2 Hz, 2H), 8.67 (d, *J* = 9.2 Hz, 2H), 8.19 – 8.15 (m, 8H), 8.09 (dd, *J* = 9.6 Hz, 5.2 Hz, 4H), 7.78 – 7.73 (m, 16H), 7.70 – 7.67 (m, 4H), 7.44 (s, 4H), 7.33 (d, *J* = 9.6 Hz, 4H), 7.19 – 7.17 (m, 8H), 7.13 (d, *J* = 1.3 Hz, 8H), 7.07 (dd, *J* = 6.2 Hz, 1.7 Hz, 8H), 1.55 (s, 36H), 1.53 (s, 36H), 1.33 (s, 144H), 1.08 (s, 36H), 1.06 (s, 36H). <sup>13</sup>C NMR (150 MHz, CD<sub>2</sub>Cl<sub>2</sub>, 298 K): 151.5, 151.4, 151.0, 150.8, 150.7, 147.3, 146.9, 146.8, 144.6, 142.9, 141.2, 140.6, 140.0, 139.8, 135.5, 135.2, 129.5, 129.4, 129.2, 129.0, 128.9, 128.8, 128.3, 128.2, 128.1, 128.0, 127.7, 127.6, 127.2, 127.1, 126.8, 126.7, 126.6, 126.5, 125.4, 124.6, 124.3, 124.2, 123.9, 123.8, 122.7, 121.7, 121.6, 121.4, 120.8, 120.6, 120.1, 119.2, 35.5, 35.4, 35.1, 32.4, 31.9, 31.8, 31.5, 30.5, 30.4, 30.1, 29.8. HRMS (MALDI, *m/z*) [M<sup>+</sup>] calcd for C<sub>328</sub>H<sub>364</sub>: 4302.8478; found: 4302.8394 (error: -1.95 ppm).

**Compound 1a-rac:** <sup>1</sup>H NMR (500 MHz, CD<sub>2</sub>Cl<sub>2</sub>, 298 K) δ ppm 10.86 (s, 4H), 9.74 (d, *J* = 9.7 Hz, 4H), 8.72 (d, *J* = 9.2 Hz, 4H), 8.19 (s, 4H), 8.15 (s, 4H), 8.09 (d, *J* = 9.6 Hz, 4H), 7.76 (d, *J* = 4.8 Hz, 16H), 7.69 (s, 4H), 7.44 (s, 4H), 7.33 (d, *J* = 9.6 Hz, 4H), 7.11 (dd, *J* = 41.1 Hz,

17.4 Hz, 24H), 1.55 (s, 124H), 1.32 (s, 72H), 1.07 (s, 72H). <sup>1</sup>H NMR (500 MHz, C<sub>6</sub>D<sub>6</sub>, 298 K) δ ppm 10.52 (s, 4H), 9.37 (d, *J* = 9.9 Hz, 4H), 8.79 – 8.75 (m, 12H), 8.54 (d, *J* = 9.6 Hz, 4H), 8.25 (s, 8H), 7.87 (s, 8H), 7.76 (d, *J* = 9.7 Hz, 8H), 7.70 (d, *J* = 1.6 Hz, 12H), 7.61 (s, 8H), 7.39 (d, *J* = 11.4 Hz, 8H), 1.57 (s, 72H), 1.35 (s, 124H), 1.12 (s, 72H). HRMS (MALDI, *m/z*) [*M*<sup>+</sup>] calcd for C<sub>328</sub>H<sub>364</sub>: 4302.8478; found: 4302.8376 (error: -2.37 ppm).

**Compound 1a-meso:** <sup>1</sup>H NMR (500 MHz, CD<sub>2</sub>Cl<sub>2</sub>, 298 K) δ ppm 10.73 (s, 4H), 9.68 (d, *J* = 9.5 Hz, 4H), 8.66 (d, *J* = 9.1 Hz, 4H), 8.16 (d, *J* = 13.6 Hz, 8H), 8.08 (d, *J* = 9.5 Hz, 4H), 7.80 – 7.64 (m, 20H), 7.44 (s, 4H), 7.33 (d, *J* = 9.5 Hz, 4H), 7.27 – 7.01 (m, 24H), 1.53 (d, *J* = 4.7 Hz, 124H), 1.32 (s, 72H), 1.06 (s, 72H). <sup>13</sup>C NMR (150 MHz, CD<sub>2</sub>Cl<sub>2</sub>, 298K): 151.4, 150.9, 150.8, 150.6, 147.3, 146.8, 144.6, 142.8, 141.1, 140.5, 140.0, 139.8, 135.4, 135.1, 129.5, 129.3, 129.1, 128.7, 128.1, 128.0, 127.5, 127.2, 126.9, 126.6, 126.5, 125.3, 124.4, 124.3, 123.9, 123.7, 122.6, 121.6, 121.4, 120.7, 120.5, 120.1, 35.4, 35.3, 35.0, 31.9, 31.7, 31.4, 31.2, 31.0. HRMS (MALDI, *m/z*) [*M*<sup>+</sup>] calcd for C<sub>328</sub>H<sub>364</sub>: 4302.8478; found: 4302.8255 (error: -5.18 ppm).

**Compound 1b:** <sup>1</sup>H NMR (600 MHz, C<sub>6</sub>D<sub>6</sub>, 298 K) δ ppm 11.05 (s, 1H), 10.81 (s, 1H), 10.25 (s, 1H), 9.99 (s, 1H), 9.49 (d, *J* = 9.3 Hz, 1H), 9.36 (d, *J* = 9.9 Hz, 1H), 9.22 (d, *J* = 9.9 Hz, 1H), 9.02 (dd, *J* = 21.9, 9.7 Hz, 2H), 8.95 (s, 1H), 8.88 (s, 1H), 8.85 – 8.77 (m, 6H), 8.73 (s, 1H), 8.69 (d, *J* = 8.8 Hz, 1H), 8.67 – 8.59 (m, 4H), 8.52 – 8.47 (m, 1H), 8.46 (s, 1H), 8.31 (d, *J* = 1.5 Hz, 2H), 8.26 (d, *J* = 9.6 Hz, 1H), 8.22 (d, *J* = 9.1 Hz, 1H), 8.19 (dd, *J* = 6.8, 1.7 Hz, 4H), 8.17 (d, *J* = 1.6 Hz, 2H), 8.06 (d, *J* = 11.1 Hz, 3H), 7.94 (d, *J* = 1.7 Hz, 2H), 7.91 (s, 2H), 7.89 (d, *J* = 1.7 Hz, 4H), 7.83 (d, *J* = 1.6 Hz, 4H), 7.82 – 7.81 (m, 2H), 7.80 (s, 1H), 7.77 – 7.74 (m, 4H), 7.68 (d, *J* = 1.6 Hz, 2H), 7.66 (d, *J* = 2.8 Hz, 1H), 7.65 – 7.61 (m, 5H), 7.59 – 7.57 (m, 3H), 7.51 – 7.50 (m, 1H), 7.50 – 7.48 (m, 1H), 7.48 – 7.46 (m, 1H), 7.46 – 7.43 (m, 2H), 7.42 – 7.40 (m, 1H), 7.36 – 7.34 (m, 1H), 7.22 – 7.20 (m, 1H), 1.53 (d, *J* = 4.2 Hz, 42H), 1.47 (s, 18H), 1.40 (d, *J* = 2.7 Hz, 36H), 1.36 (s, 24H), 1.32 (d, *J* = 8.2 Hz, 72H), 1.27 (s, 24H), 1.23 (s, 24H), 1.18 (s, 24H), 1.10 (s, 24H). HRMS (MALDI, *m/z*) [*M*<sup>+</sup>] calcd for C<sub>328</sub>H<sub>364</sub>: 4302.8478; found: 4302.8296 (error: -4.23 ppm).

**Compound 1c:** <sup>1</sup>H NMR (600 MHz, C<sub>6</sub>D<sub>6</sub>, 297 K) δ ppm 11.52 (s, 1H), 11.17 (s, 1H), 10.90 (s, 1H), 10.20 (s, 1H), 9.84 (d, *J* = 9.3 Hz, 1H), 9.63 (d, *J* = 10.0 Hz, 1H), 9.51 (d, *J* = 9.7 Hz, 1H), 9.45 (d, *J* = 9.7 Hz, 1H), 9.08 (s, 1H), 9.03 (d, *J* = 9.3 Hz, 1H), 8.92 – 8.84 (m, 6H), 8.81 – 8.78 (m, 3H), 8.74 (d, *J* = 9.2 Hz, 1H), 8.70 (s, 1H), 8.59 (d, *J* = 8.7 Hz, 1H), 8.52 (s, 2H), 8.40 (s, 2H), 8.29 (s, 2H), 8.06 – 8.02 (m, 8H), 7.96 – 7.92 (m, 6H), 7.88 (d, *J* = 7.4 Hz, 3H), 7.81 – 7.79 (m, 8H), 7.71 (s, 1H), 7.63 (d, *J* = 11.2 Hz, 2H), 7.58 (d, *J* = 7.3 Hz, 2H), 7.54 – 7.50 (m, 3H), 7.43 (dd, *J* = 16.9 Hz, 7.9 Hz, 4H), 7.29 (s, 1H), 7.20 (d, *J* = 14.2 Hz, 5H), 7.03 (s, 1H), 1.67 – 1.48 (m, 126H), 1.39 (s, 18H), 1.24 (d, *J* = 8.4 Hz, 54H), 1.15 (s, 18H), 1.01 (s, 18H), 0.85 (s, 18H), 0.59 (s, 9H), 0.43 (s, 27H). <sup>13</sup>C NMR (150 MHz, C<sub>6</sub>D<sub>6</sub>, 298 K): 151.8, 151.4, 151.3, 151.1, 150.9, 150.7, 150.4, 149.5, 148.7, 147.9, 147.8, 147.7, 147.0, 146.6, 145.7, 145.6, 145.0, 144.7, 144.3, 144.1, 143.8, 143.6, 143.4, 142.9, 142.1,

142.0, 141.9, 141.7, 141.6, 141.3, 141.1, 140.8, 140.6, 140.5, 139.1, 137.0, 136.3, 136.1, 136.0, 135.6, 135.1, 132.5, 131.0, 130.7, 130.4, 130.3, 130.2, 129.9, 129.8, 129.7, 129.5, 129.2, 129.0, 128.8, 128.7, 128.5, 127.7, 127.6, 127.5, 127.2, 127.0, 126.7, 126.5, 126.4, 126.1, 125.9, 125.6, 125.2, 125.0, 124.9, 124.7, 124.5, 124.2, 124.1, 123.8, 123.6, 123.5, 123.3, 123.2, 123.0, 122.9, 122.8, 121.5, 121.3, 121.0, 120.8, 120.6, 120.5, 119.3, 118.2, 35.6, 35.5, 35.4, 35.3, 35.2, 35.1, 34.9, 34.8, 34.4, 32.8, 32.4, 32.2, 32.1, 32.0, 31.8, 31.7, 31.6, 31.5, 31.4, 31.2, 31.0, 30.3, 30.2, 30.1, 30.0, 29.9, 29.8, 29.7, 27.8. HRMS (MALDI,  $m/z$ ) [ $M^+$ ] calcd for  $C_{328}H_{360}$ : 4298.8165; found: 4298.8234 (error: 1.61 ppm).

**Compound 1d:**  $^1H$  NMR (600 MHz,  $C_6D_6$ , 298 K)  $\delta$  ppm 12.32 (s, 1H), 11.93 (s, 1H), 10.66 (d,  $J = 9.1$  Hz, 1H), 10.56 (s, 1H), 10.53 (s, 1H), 9.90 (d,  $J = 8.8$  Hz, 1H), 9.68 (dd,  $J = 21.9$  Hz, 9.4 Hz, 2H), 9.17 (s, 1H), 9.05 (d,  $J = 9.2$  Hz, 1H), 8.98 – 8.85 (m, 5H), 8.76 (d,  $J = 11.0$  Hz, 4H), 8.71 (d,  $J = 8.7$  Hz, 1H), 8.66 (s, 1H), 8.46 (d,  $J = 16.6$  Hz, 4H), 8.36 (s, 2H), 8.29 (s, 2H), 8.22 (s, 4H), 8.13 (s, 2H), 8.08 (d,  $J = 9.4$  Hz, 1H), 7.98 (d,  $J = 44.5$  Hz, 4H), 7.90 – 7.85 (m, 4H), 7.85 – 7.77 (m, 4H), 7.74 (s, 3H), 7.69 (s, 1H), 7.64 (d,  $J = 12.0$  Hz, 4H), 7.58 (s, 1H), 7.55 (d,  $J = 8.8$  Hz, 5H), 7.40 (s, 2H), 7.34 (s, 1H), 7.31 (d,  $J = 7.2$  Hz, 2H), 7.23 (s, 1H), 7.07 (s, 1H), 6.84 (s, 1H), 1.65 (d,  $J = 4.9$  Hz, 36H), 1.55 (d,  $J = 23.9$  Hz, 90H), 1.48 (s, 18H), 1.34 (s, 54H), 1.22 (s, 18H), 1.03 (s, 18H), 1.01 (s, 18H), 0.98 (s, 18H), 0.95 (s, 18H).  $^{13}C$  NMR (150 MHz,  $C_6D_6$ , 298 K): 151.5, 151.4, 151.3, 151.2, 151.1, 151.0, 150.0, 149.7, 149.6, 149.4, 149.2, 149.1, 149.0, 148.9, 148.7, 148.6, 148.5, 147.9, 147.7, 146.4, 146.1, 146.0, 145.3, 145.2, 145.1, 144.6, 144.4, 144.3, 144.2, 144.1, 143.8, 143.7, 143.0, 142.9, 142.5, 142.2, 142.1, 142.0, 141.9, 141.8, 141.6, 141.0, 140.7, 140.5, 140.2, 139.8, 139.6, 139.4, 139.1, 136.5, 136.3, 136.1, 135.6, 135.5, 135.4, 135.0, 134.7, 133.5, 132.7, 132.1, 131.2, 131.1, 131.0, 130.8, 130.7, 130.5, 130.3, 130.0, 129.5, 129.3, 129.2, 129.0, 127.2, 126.8, 126.6, 126.5, 126.1, 126.0, 125.8, 125.7, 125.6, 125.4, 125.3, 125.2, 125.0, 124.8, 124.7, 124.6, 124.5, 124.4, 124.3, 124.2, 123.5, 123.4, 123.2, 122.8, 122.3, 121.7, 121.6, 121.5, 121.4, 121.2, 121.1, 121.0, 35.6, 35.5, 35.4, 35.3, 35.2, 35.1, 35.0, 34.9, 34.5, 32.4, 32.1, 32.0, 31.9, 31.8, 31.6, 31.5, 31.4, 31.3, 30.8, 30.3, 30.2, 30.0, 29.9, 29.8, 27.8. HRMS (MALDI,  $m/z$ ) [ $M^+$ ] calcd for  $C_{328}H_{358}$ : 4296.8008; found: 4296.8653 (error: 15.01 ppm).

## 2. Additional spectra and data

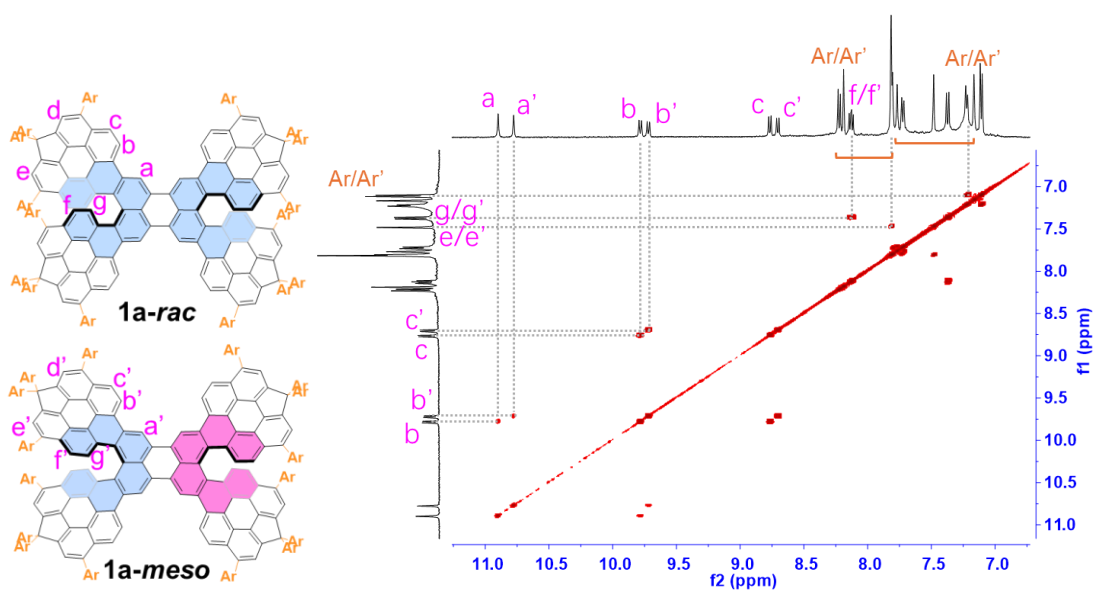

Fig. S4. Partial 2D COSY NMR spectrum of **1a** in CD<sub>2</sub>Cl<sub>2</sub> (500 MHz) with assignment.

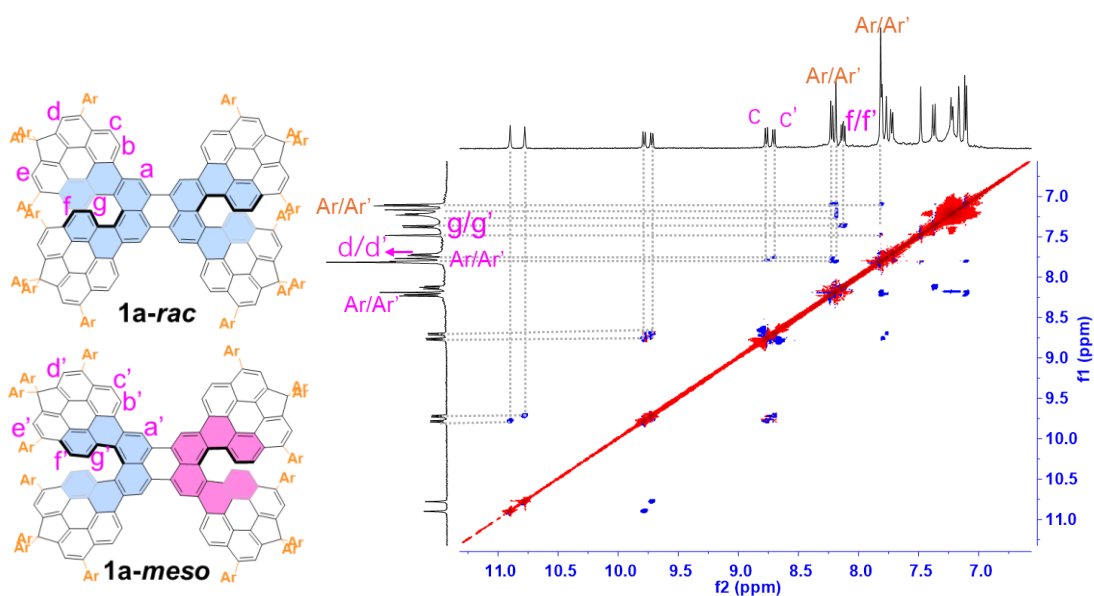

Fig. S5. Partial 2D ROESY NMR spectrum of **1a** in CD<sub>2</sub>Cl<sub>2</sub> (500 MHz) with assignment.

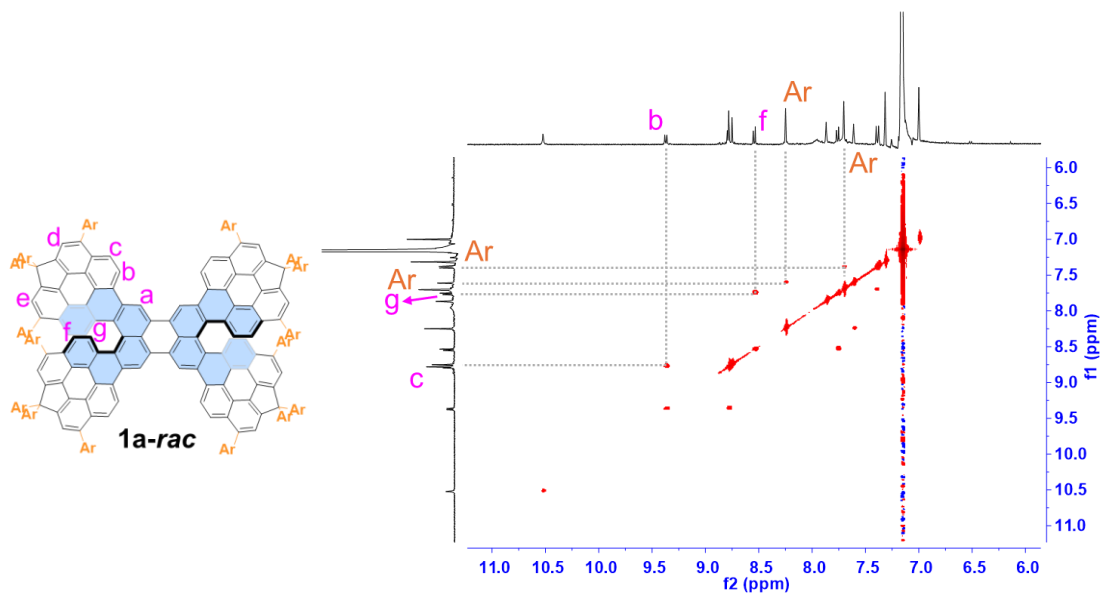

**Fig. S6.** Partial 2D COSY NMR spectrum of **1a-rac** in  $C_6D_6$  (500 MHz) with assignment.

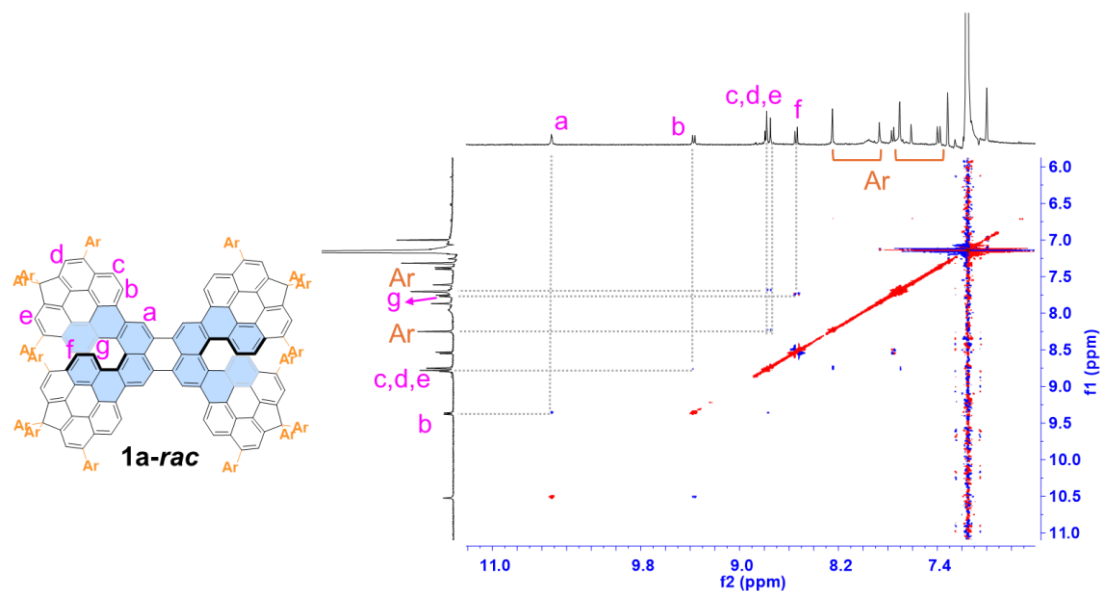

**Fig. S7.** Partial 2D ROESY NMR spectrum of **1a-rac** in  $C_6D_6$  (500 MHz) with assignment.

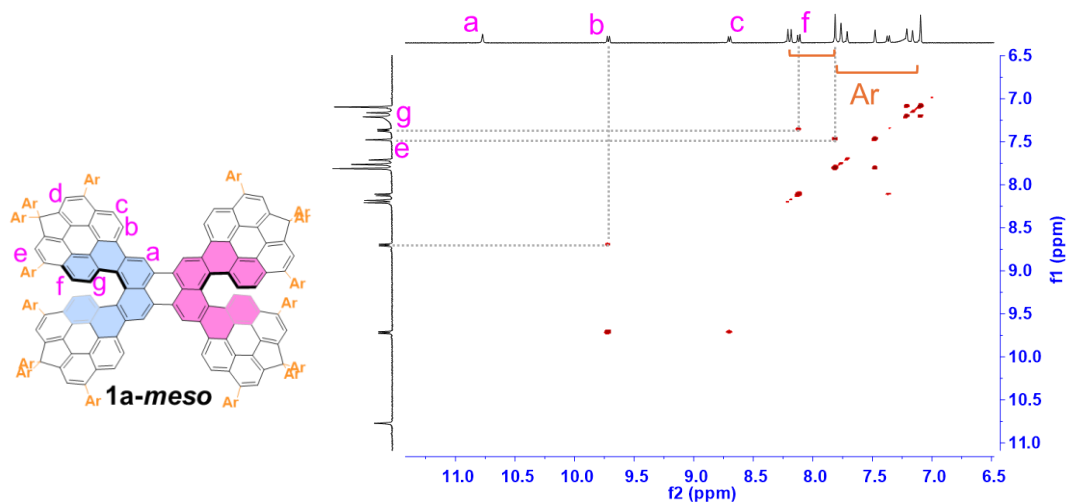

**Fig. S8.** Partial 2D COSY NMR spectrum of **1a-meso** in  $\text{CD}_2\text{Cl}_2$  (600 MHz) with assignment.

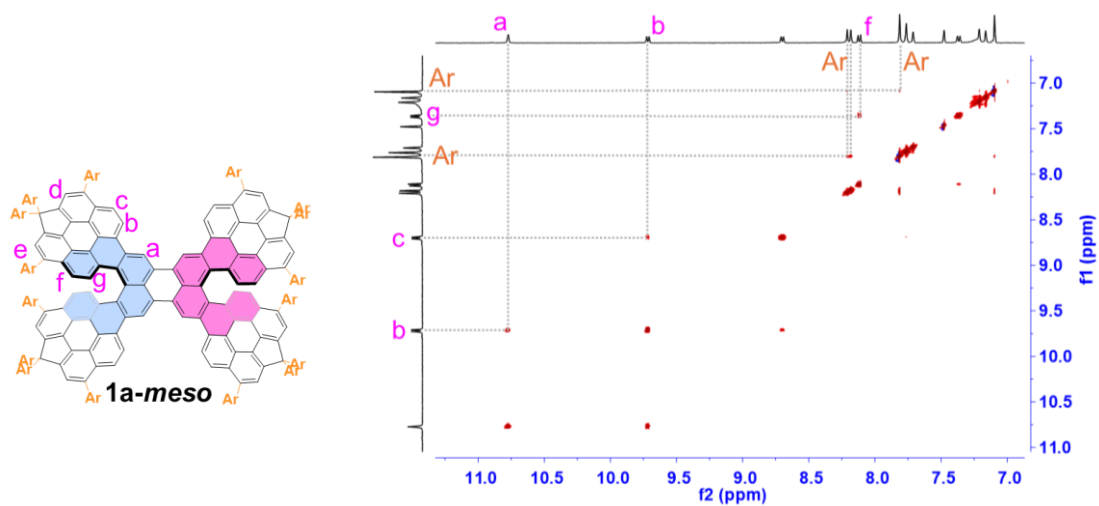

**Fig. S9.** Partial 2D NOESY NMR spectrum of **1a-meso** in  $\text{CD}_2\text{Cl}_2$  (600 MHz) with assignment.

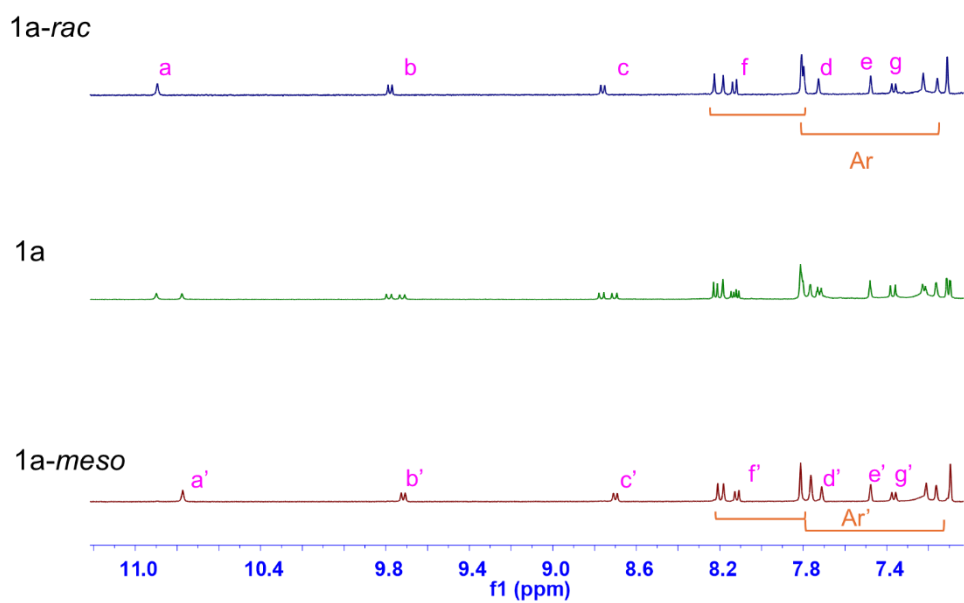

**Fig. S10.** Partial  $^1\text{H}$  NMR spectra of **1a**, **1a-rac** and **1a-meso** in  $\text{CD}_2\text{Cl}_2$  with assignment.

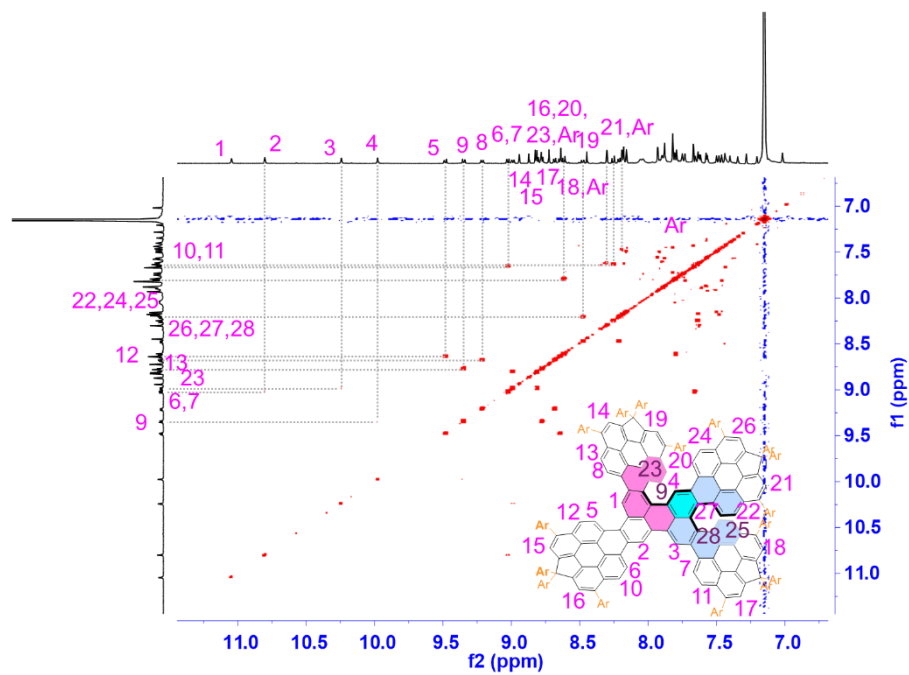

**Fig. S11.** Partial 2D COSY NMR spectrum of **1b** in  $\text{C}_6\text{D}_6$  (500 MHz) with assignment.

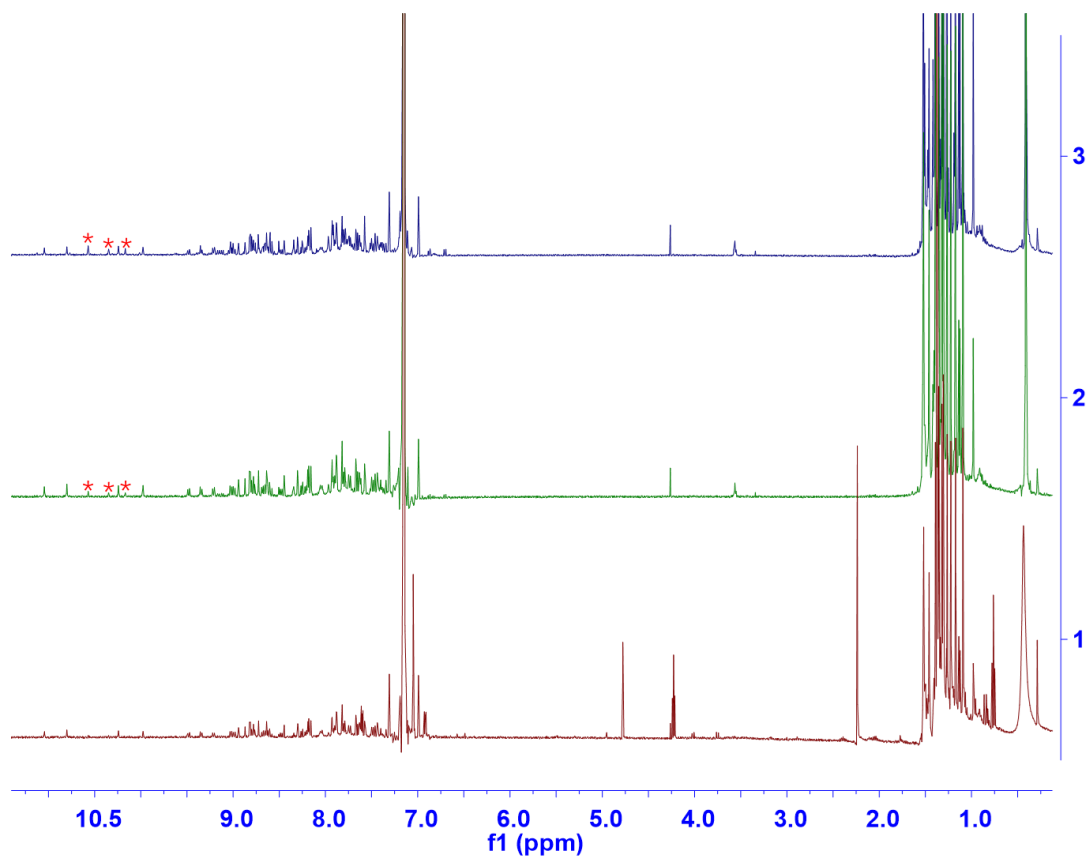

**Fig. S12.** The chemical transformation process of **1b** in solution monitored by <sup>1</sup>H NMR during a long time 2D-NMR experiments (about 4 h). Spectrum 1 corresponds to the initial <sup>1</sup>H NMR measurement. Spectrum 2 was recorded at the start of the 2D-NMR experiments, after washing the sample from Spectrum 1 with methanol to remove solvent impurities. Spectrum 3 was obtained after completing the 2D-NMR measurements. The peaks labelled with “\*” indicate the formation of a new species.

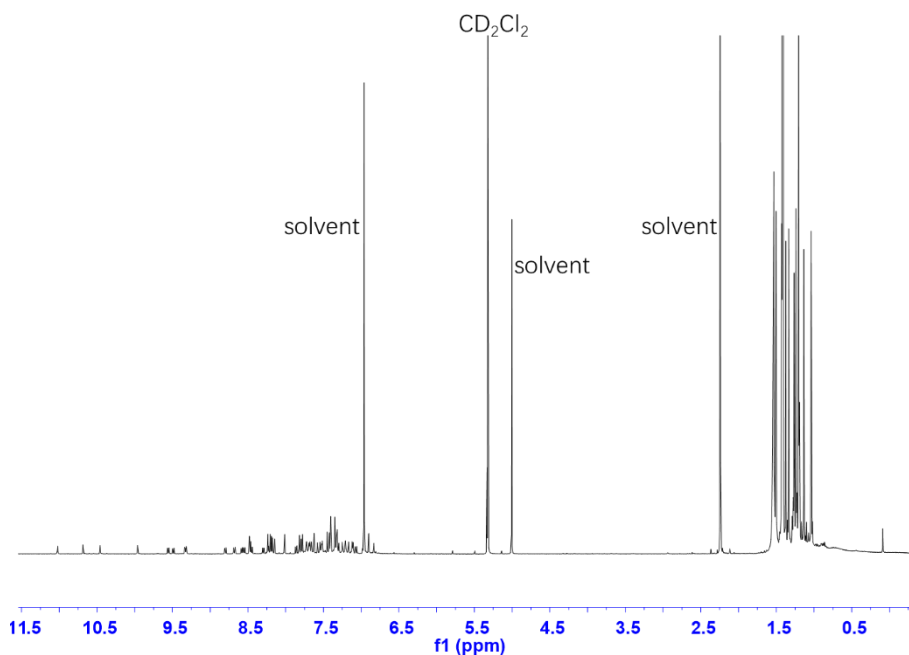

**Fig. S13.**  $^1\text{H}$  NMR spectrum (500 MHz,  $\text{CD}_2\text{Cl}_2$ ) of **1b** after purification by preparative HPLC. The clean spectrum with sharp peaks confirms the high purity of freshly prepared **1b**. The presence of multiple solvent signals is attributed to residual solvents from the preparative HPLC column.

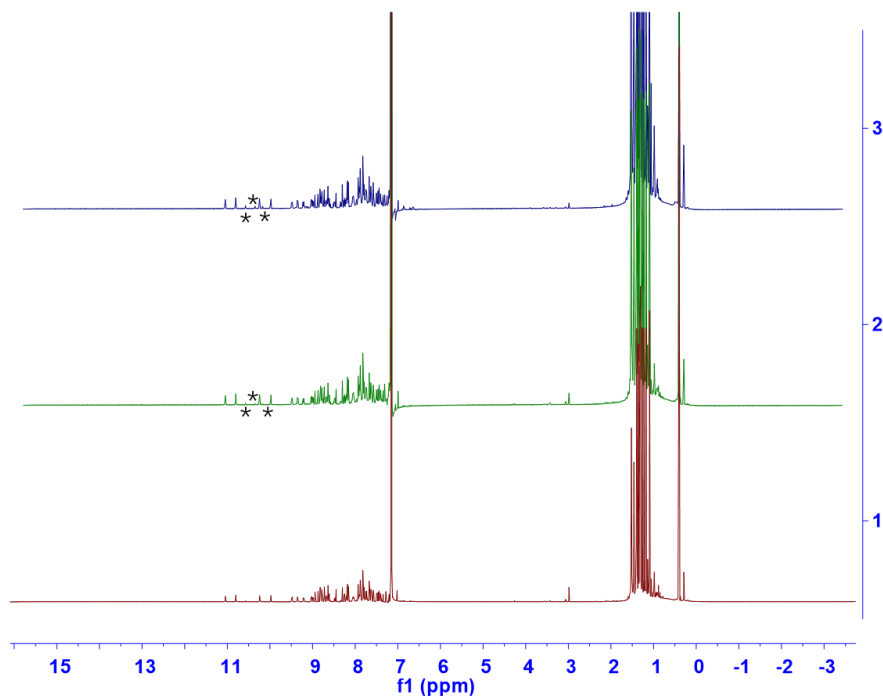

**Fig. S14.** Chemical transformation of **1b** in solution monitored by  $^1\text{H}$  NMR over a short time period (~30 min) during 2D NMR experiments. Spectrum 1 corresponds to the initial  $^1\text{H}$  NMR measurement after further purification by PTLC of the sample obtained from preparative HPLC (Fig. S10). Spectrum 2 was recorded at the beginning of the 2D NMR experiments. Spectrum

3 was acquired after completion of the 2D NMR measurements. Peaks marked with “\*” indicate the formation of a new species.

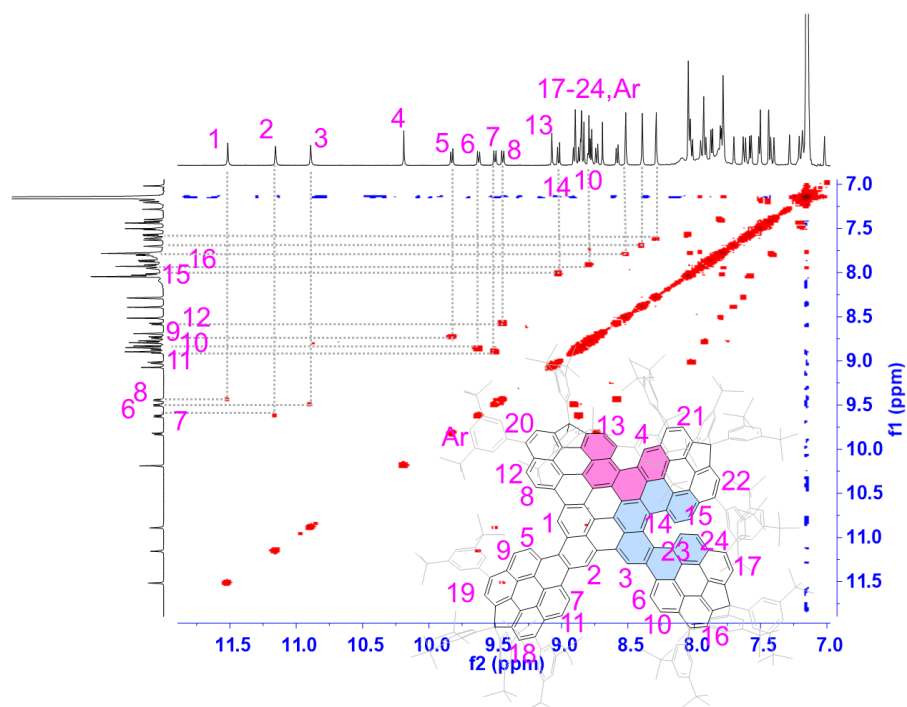

**Fig. S15.** Partial 2D COSY NMR spectrum of **1c** in C<sub>6</sub>D<sub>6</sub> (500 MHz) with assignment.

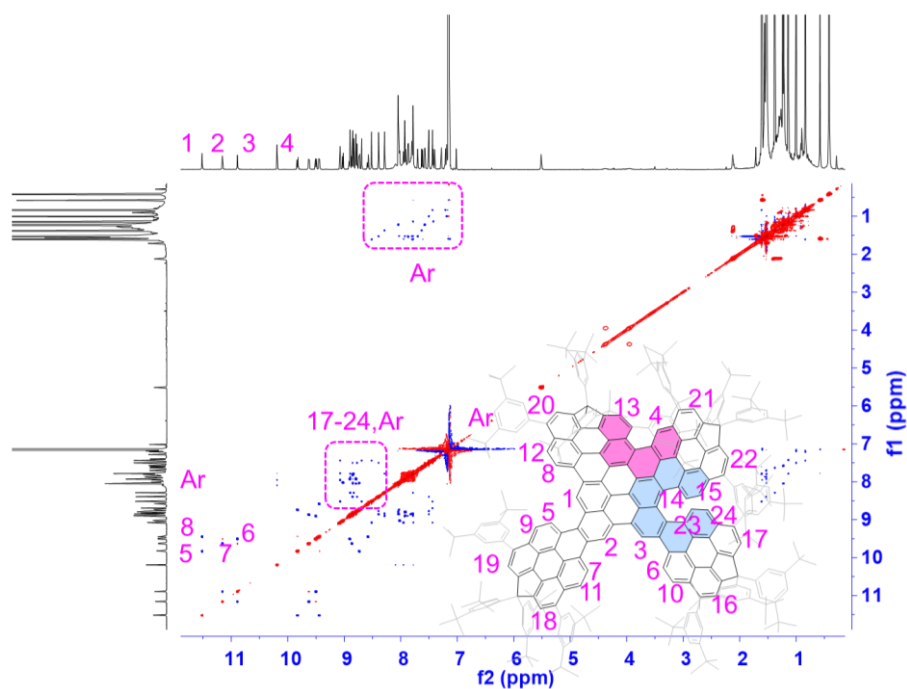

**Fig. S16.** 2D ROESY NMR spectrum of **1c** in C<sub>6</sub>D<sub>6</sub> (500 MHz) with assignment.

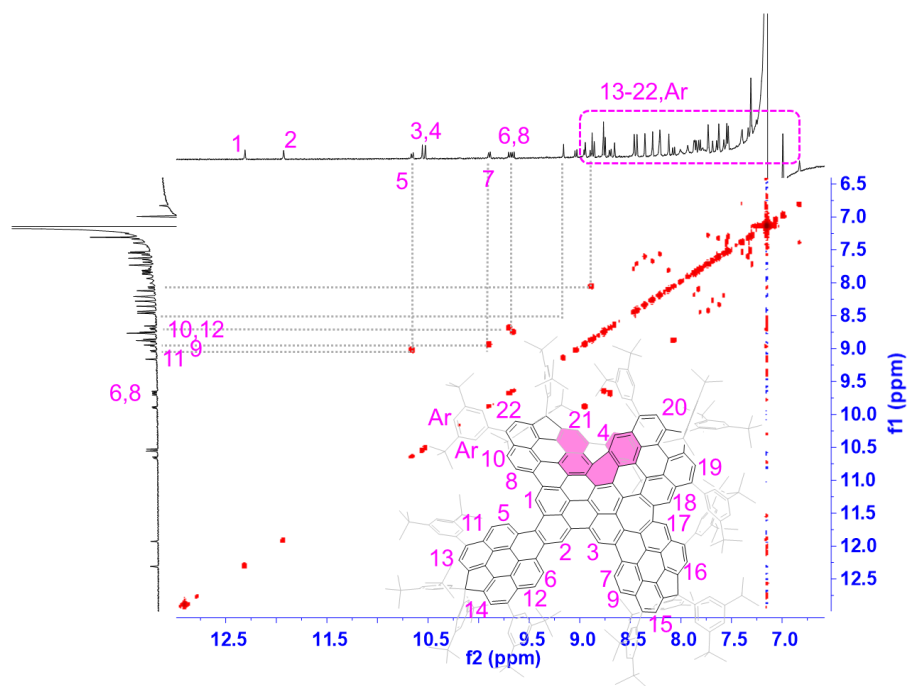

**Fig. S17.** Partial 2D COSY NMR spectrum of **1d** in  $C_6D_6$  (500 MHz) with assignment.

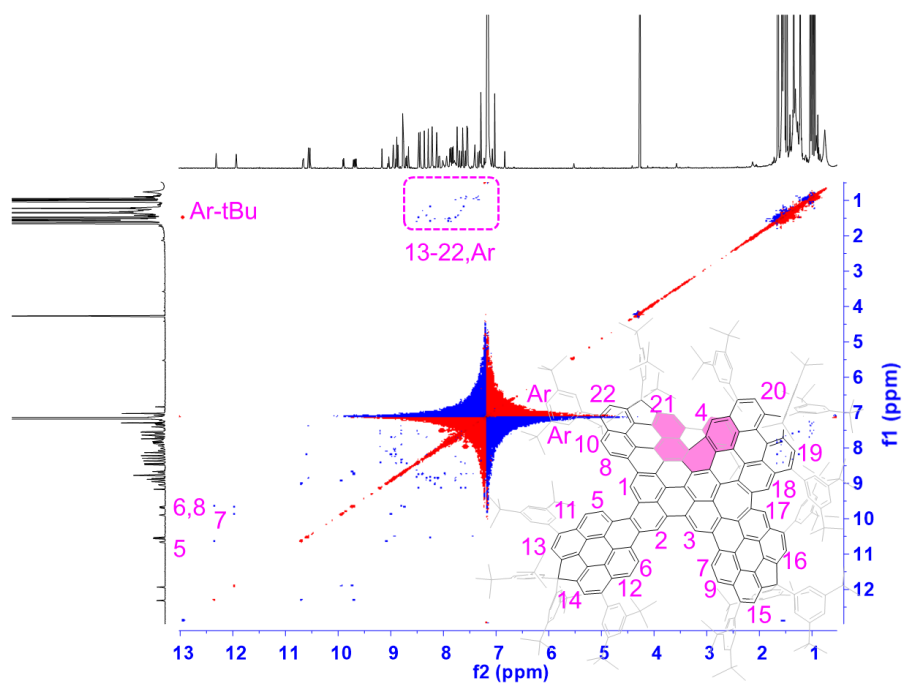

**Fig. S18.** 2D ROESY NMR spectrum of **1d** in  $C_6D_6$  (500 MHz) with assignment.

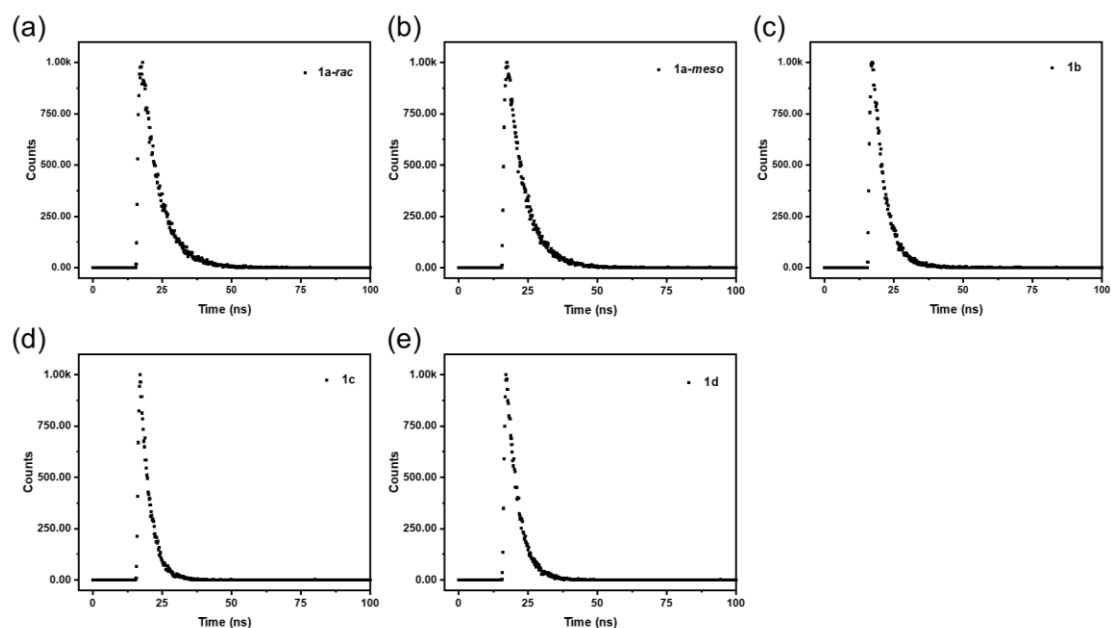

**Fig. S19.** Time-resolved fluorescence decay profile of **1a-rac**, **1a-meso**, **1b-d**. (a) **1a-rac** ( $\lambda_{\text{exc}} = 280 \text{ nm}$ ,  $\lambda_{\text{probe}} = 599 \text{ nm}$ ); (b) **1a-meso** ( $\lambda_{\text{exc}} = 280 \text{ nm}$ ,  $\lambda_{\text{probe}} = 599 \text{ nm}$ ); (c) **1b** ( $\lambda_{\text{exc}} = 280 \text{ nm}$ ,  $\lambda_{\text{probe}} = 661 \text{ nm}$ ); (d) **1c** ( $\lambda_{\text{exc}} = 365 \text{ nm}$ ,  $\lambda_{\text{probe}} = 760 \text{ nm}$ ); (e) **1d** ( $\lambda_{\text{exc}} = 365 \text{ nm}$ ,  $\lambda_{\text{probe}} = 786 \text{ nm}$ ).

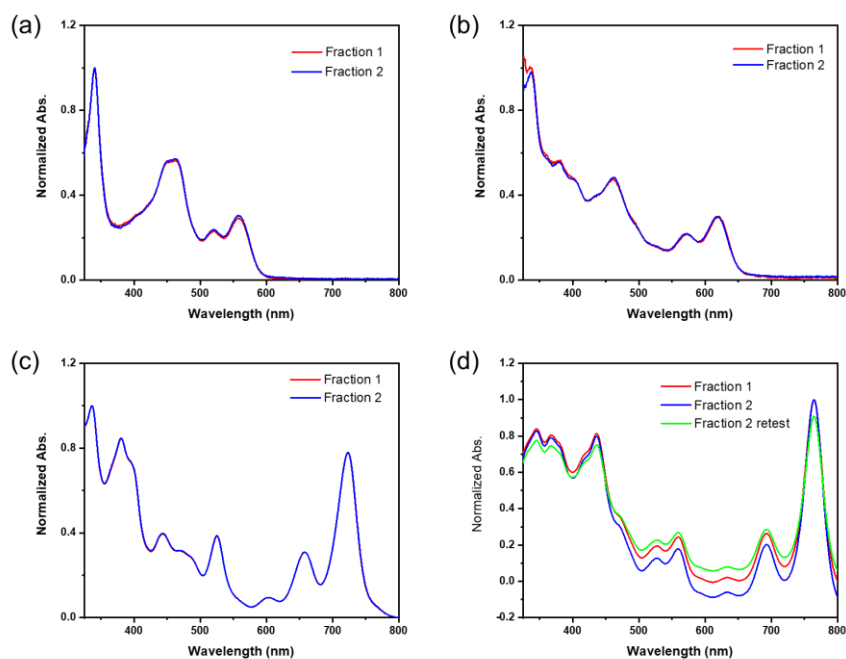

**Fig. S20.** Absorption spectra of the two fractions collected during the separation of (a) **1a-rac**; (b) **1b**; (c) **1c**; and (d) **1d** by preparative HPLC. The separated fractions were recorded in THF/acetone (20:80). The nearly identical spectra of the two fractions confirm the purity of the collected samples. Minor differences are attributed to slight variations in solvent composition and baseline fluctuations, as evidenced by repeated measurements of Fraction 2 of **1d**, which show small inconsistencies.

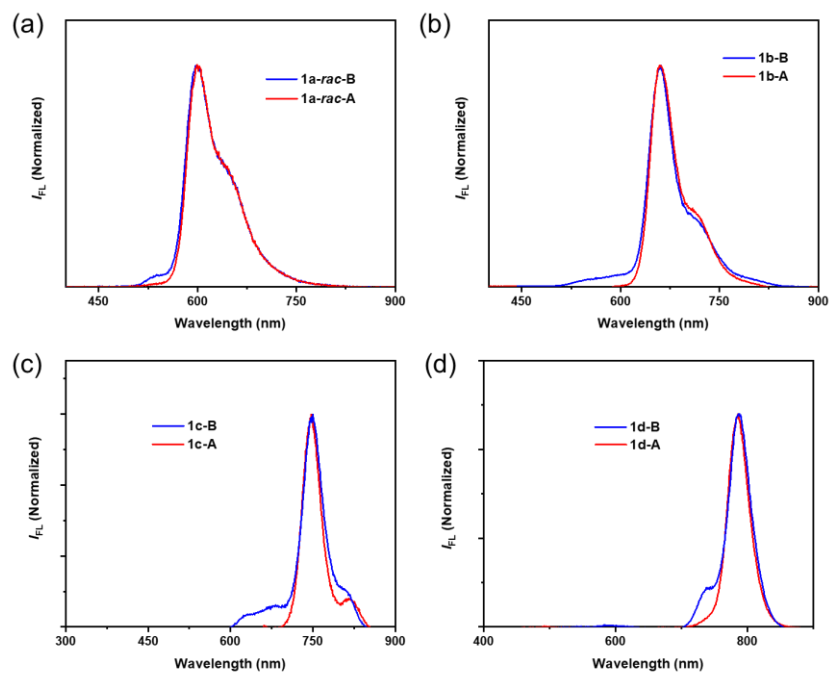

**Fig. S21.** Fluorescence spectra of freshly prepared (a) **1a-rac**; (b) **1b**; (c) **1c**; and (d) **1d** under different solvent removal conditions. Condition A: solvent removed under a nitrogen stream with strict protection from light and without heating. Condition B: solvent removed using a rotary evaporator with heating and without strict light protection.

### 3. Chiral HPLC analysis and chiroptical spectra

Isolation of enantiomers of **1a-rac** by chiral HPLC

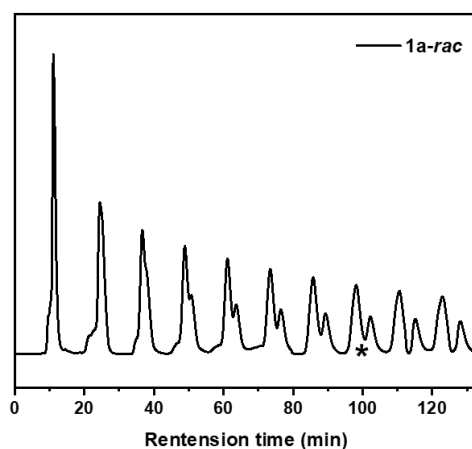

**Fig. S22.** HPLC chart for the separation of enantiomers of **1a-rac** using UV (350 nm) detectors in THF/acetone (20:80) at the flow rate of 8.0 ml/min. Optical resolution was carried out with a COSMOSIL Cholester column (2(i.d.)  $\times$  25 cm) at 25 °C. The portion labeled with “\*” was collected first to ensure complete separation. The first and second fractions were determined as (*P,P*)-**1a-rac** and (*M,M*)-**1a-rac** based on experimental and theoretical circular dichroism (CD) spectra, respectively.

Isolation of enantiomers of **1b** by chiral HPLC

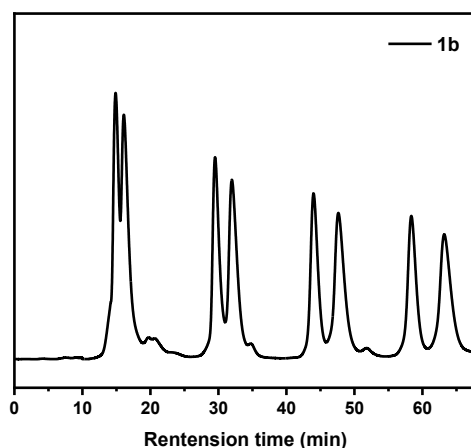

**Fig. S23.** HPLC chart for the separation of enantiomers of **1b** using UV (350 nm) detectors in THF/acetone (20:80) at the flow rate of 8.0 ml/min. Optical resolution was carried out with a COSMOSIL Cholester column (2(i.d.)  $\times$  25 cm) at 25 °C. The first and second fractions were determined as (*P*)[5](*M*)[6]-**1b** and (*M*)[5](*P*)[6]-**1b** based on experimental and theoretical circular dichroism (CD) spectra, respectively.

Isolation of enantiomers of **1c** by chiral HPLC

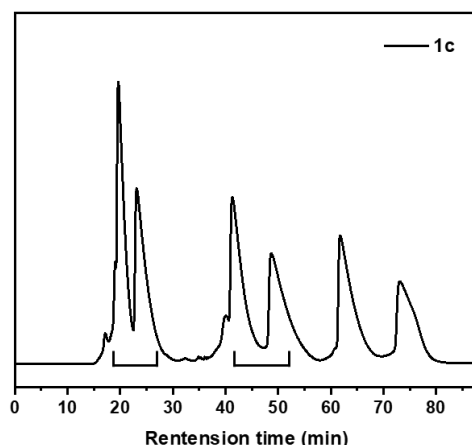

**Fig. S24.** HPLC chart for the separation of enantiomers of **1c** using UV (350 nm) detectors in THF/acetone (20:80) at the flow rate of 8.0 ml/min. Optical resolution was carried out with a COSMOSIL Cholester column (2(i.d.) × 25 cm) at 25 °C. The labels in the Fig. denote the ranges covered during the first and second HPLC separation cycles. The first and second fractions were determined as (*M*)[4](*P*)[6]-**1c** and (*P*)[4](*M*)[6]-**1c** based on experimental and theoretical circular dichroism (CD) spectra, respectively.

Isolation of enantiomers of **1d** by chiral HPLC

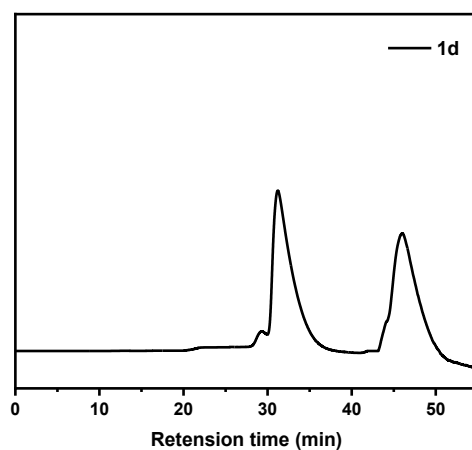

**Fig. S25.** HPLC chart for the separation of enantiomers of **1d** using UV (320 nm) detectors in THF/acetone (20:80) at the flow rate of 8.0 ml/min. Optical resolution was carried out with a COSMOSIL Cholester column (2(i.d.) × 25 cm) at 25 °C. The labels in the Fig. denote the ranges covered during the first and second HPLC separation cycles. The first and second fractions were determined as (*M*)-**1d** and (*P*)-**1d** based on experimental and theoretical circular dichroism (CD) spectra, respectively.

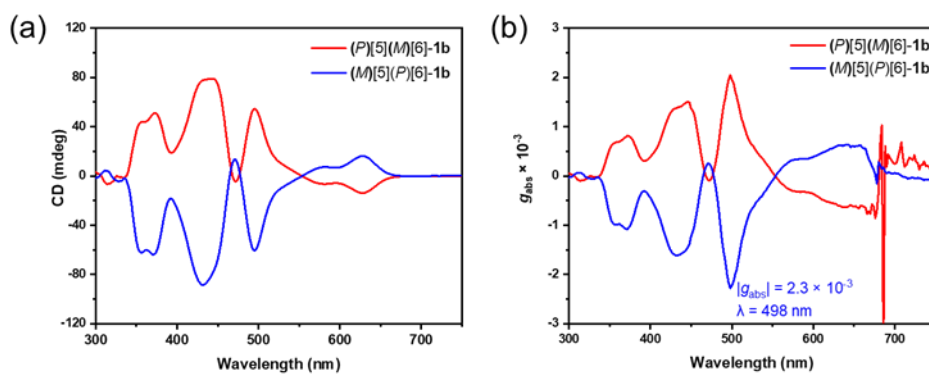

**Fig. S26.** (a), (b) CD spectra of the enantiomers of **1b** measured in DCM. ( $c \sim 6.8 \times 10^{-6} \text{ M}$ )

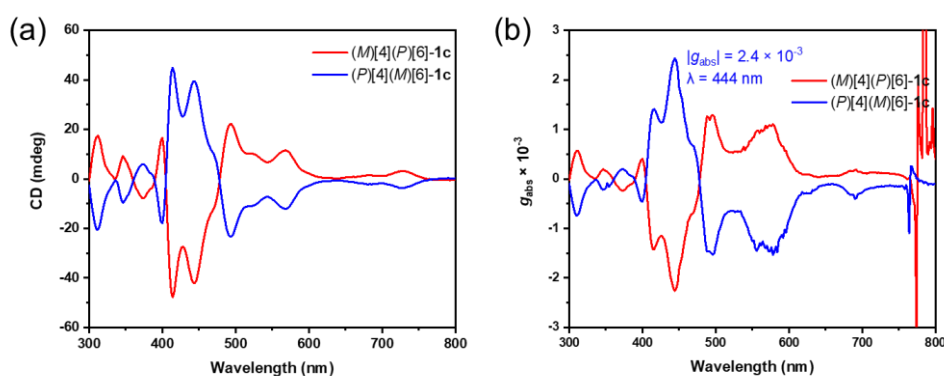

**Fig. S27.** (a), (b) CD spectra of the enantiomers of **1c** measured in DCM. ( $c \sim 3.3 \times 10^{-6} \text{ M}$ )

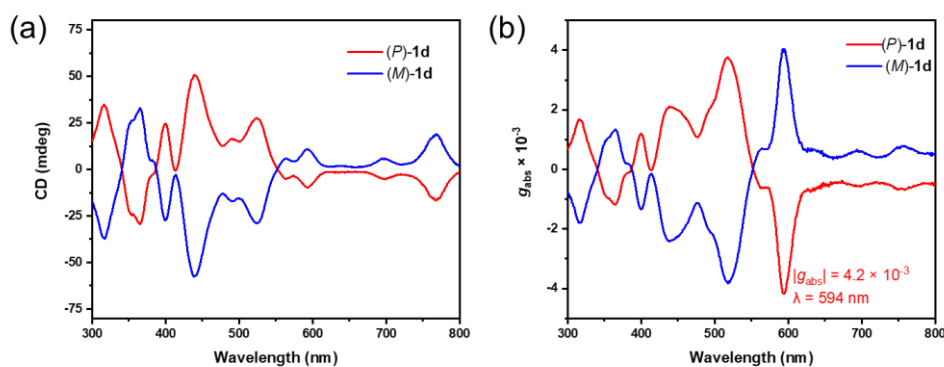

**Fig. S28.** (a), (b) CD spectra of the enantiomers of **1d** measured in DCM. ( $c \sim 8.8 \times 10^{-6} \text{ M}$ )

#### 4. DFT calculations

Density functional theory (DFT) calculations were carried out using the Gaussian09 program package.<sup>[3]</sup> The Becke three-parameter hybrid exchange functional combined with the Lee–Yang–Parr correlation functional (B3LYP) was employed with the 6-31G(d,p) basis set for all atoms.<sup>[4]</sup> Geometry optimizations and time-dependent DFT (TD-DFT) calculations were performed at the B3LYP-D3/6-31G(d,p) level of theory, where the DFT-D3 dispersion correction was included to account for van der Waals interactions.<sup>[5]</sup> Solvent effects were considered using the polarizable continuum model (PCM).<sup>[6]</sup> All optimized structures were confirmed as true minima through vibrational frequency analysis, showing no imaginary frequencies. Transition dipole moments were visualized using UCSF Chimera.<sup>[7]</sup>

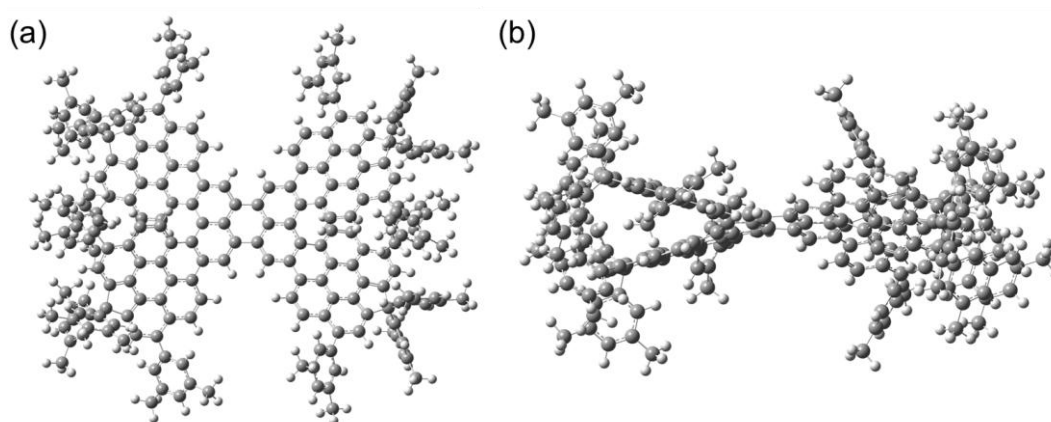

**Fig. S29.** The optimized geometry of **1a-rac** (a) top-view and (b) side-view with B3LYP-D3/6-31G (d,p) level of theory showing a butterfly-like geometry. The *tert*-butyl substituents are replaced by methyl groups during the calculations.

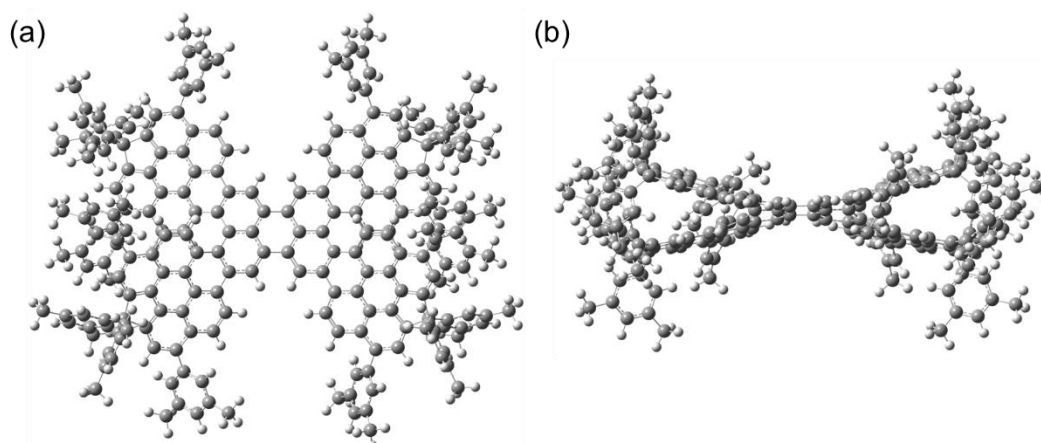

**Fig. S30.** The optimized geometry of **1a-meso** (a) top-view and (b) side-view with B3LYP-D3/6-31G (d,p) level of theory showing a butterfly-like geometry. The *tert*-butyl substituents are replaced by methyl groups during the calculations.

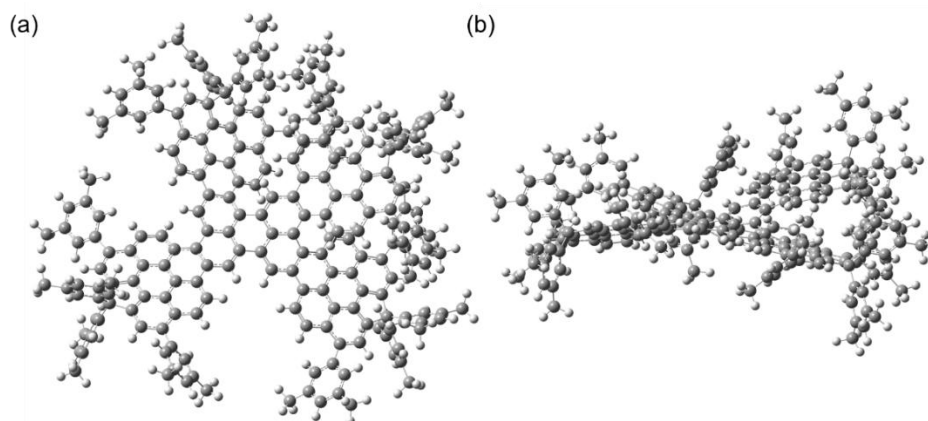

**Fig. S31.** The optimized geometry of **1b** (a) top-view and (b) side-view with B3LYP-D3/6-31G (d,p) level of theory showing a butterfly-like geometry. The *tert*-butyl substituents are replaced by methyl groups during the calculations.

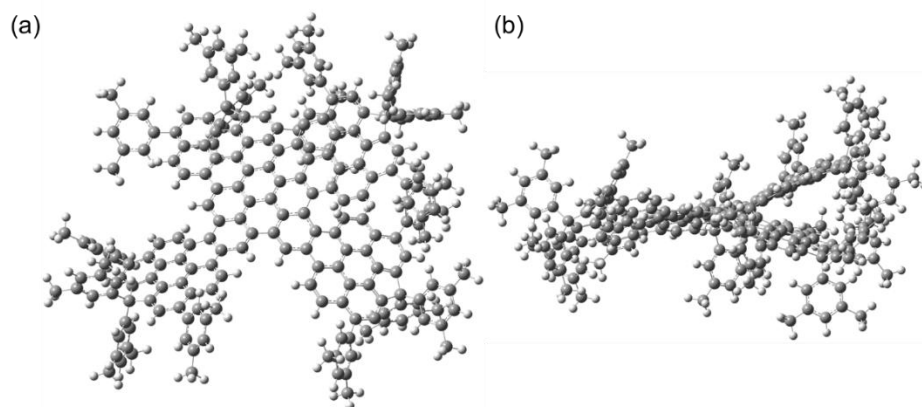

**Fig. S32.** The optimized geometry of **1c** (a) top-view and (b) side-view with B3LYP-D3/6-31G (d,p) level of theory showing a butterfly-like geometry. The *tert*-butyl substituents are replaced by methyl groups during the calculations.

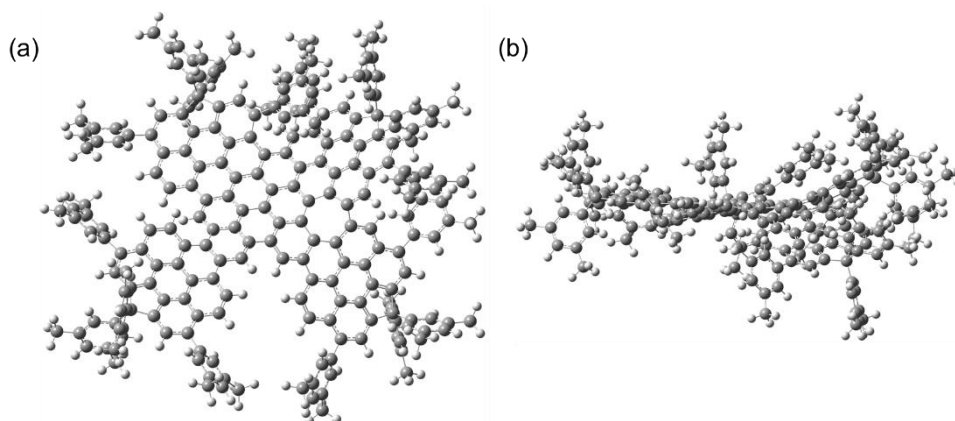

**Fig. S33.** The optimized geometry of **1d** (a) top-view and (b) side-view with B3LYP-D3/6-31G (d,p) level of theory showing a butterfly-like geometry. The *tert*-butyl substituents are replaced by methyl groups during the calculations.

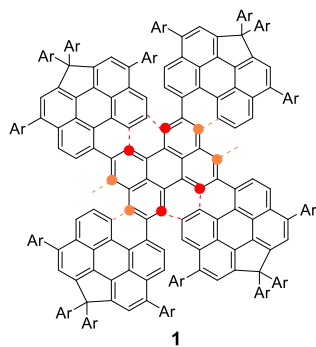

Possible isomers:

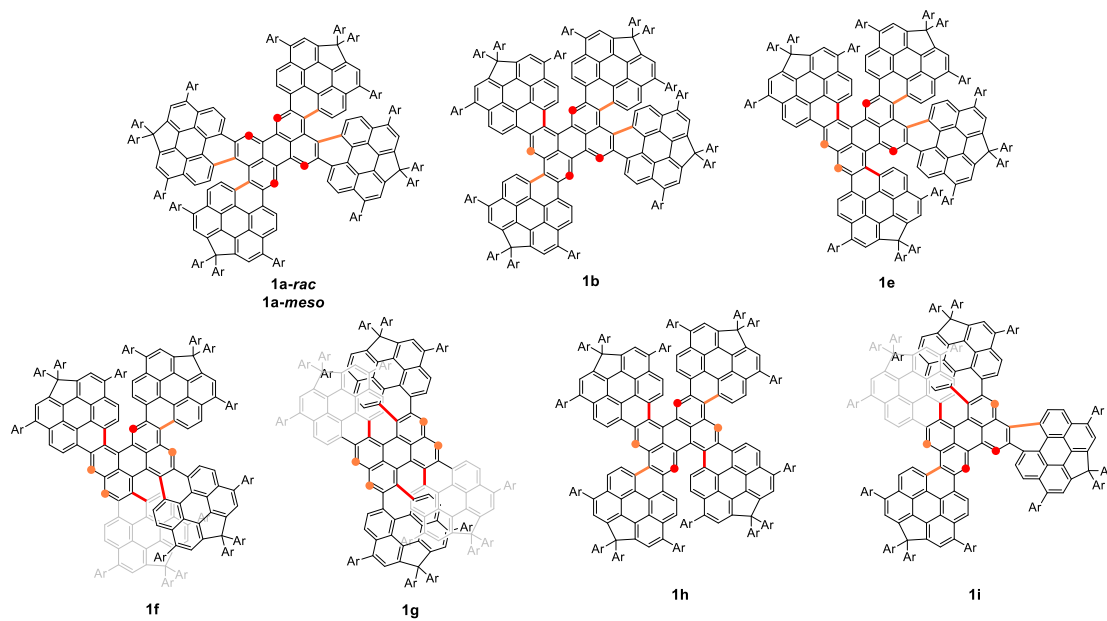

**Fig. S34.** The reaction sites for the final Scholl reaction and the possible final products.

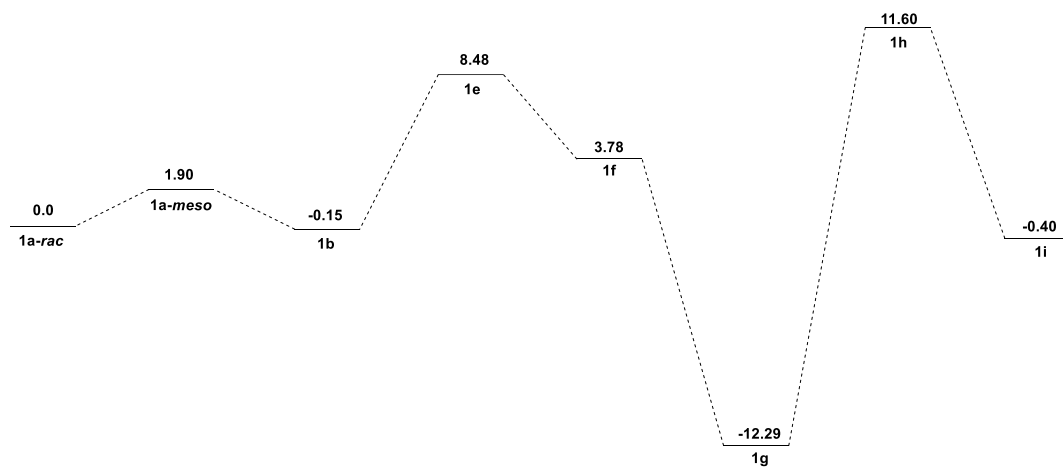

**Fig. S35.** The energy difference (in kcal/mol) of the possible products compared to compound **1a-rac**.

Possible isomer of **1d**:

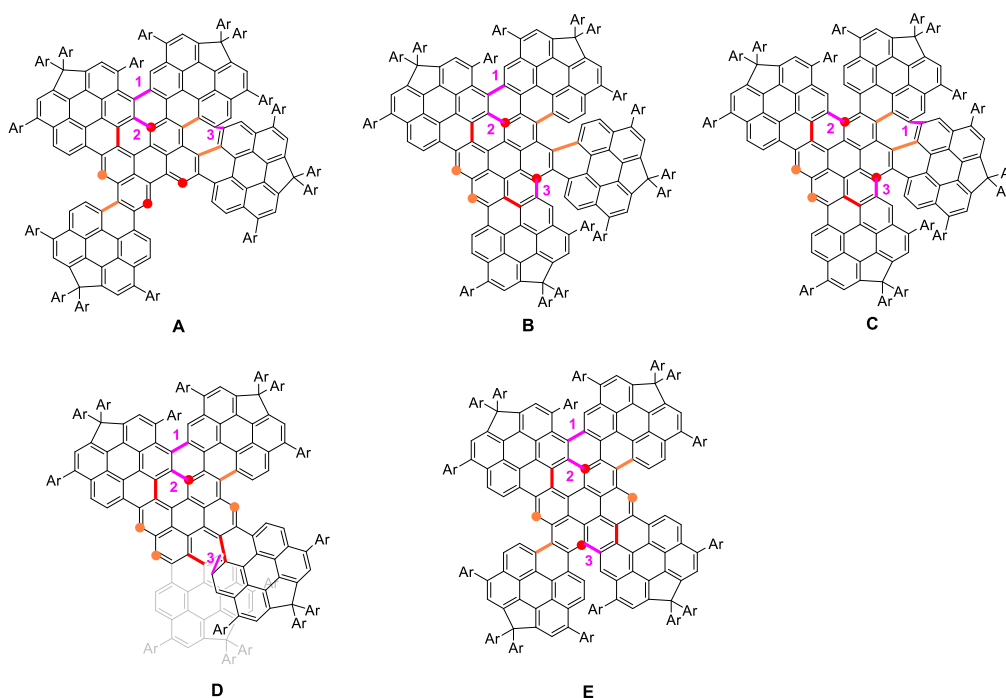

**Fig. S36.** The possible structure of **1d** is derived from the possible isomers of compound **1**.

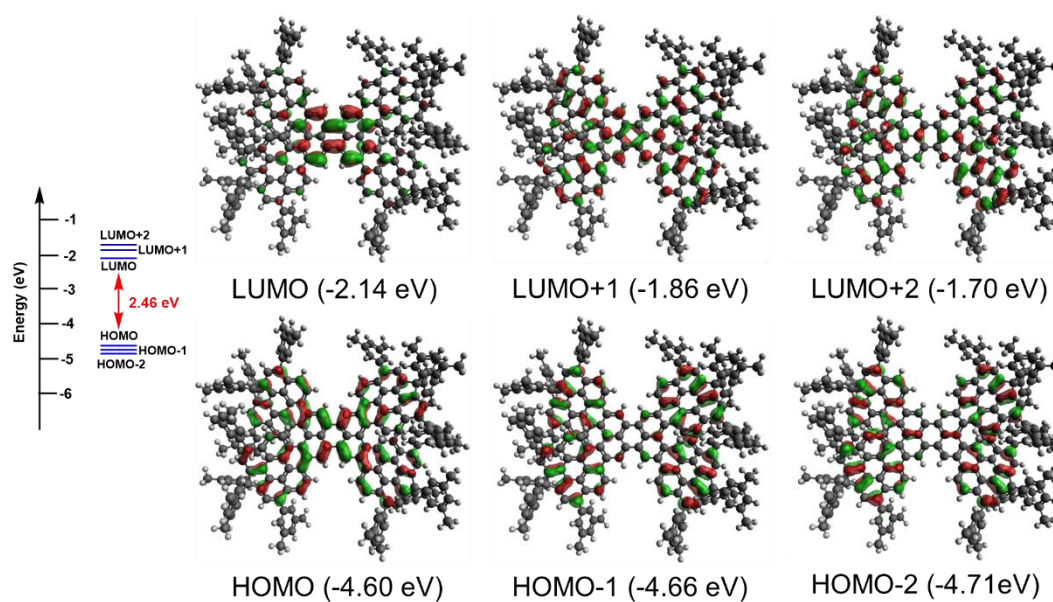

**Fig. S37.** Energy diagram and frontier molecular orbital profiles of **1a-rac** obtained by B3LYP-D3/6-31g(d,p) level calculation (isovalue = 0.02). The substituents are replaced by methyl groups during the calculations.

**Table S1.** Selected TD-DFT (B3LYP-D3/6-31G(d,p)) calculated wavelength, oscillator strength and compositions of major electronic transitions of **1a-rac**.

| Wavelength (nm) | Osc. Strength ( <i>f</i> ) | Major contribs                                                    |
|-----------------|----------------------------|-------------------------------------------------------------------|
| <b>599.1022</b> | 1.3354                     | HOMO->LUMO (97%)                                                  |
| <b>583.8397</b> | 0.0001                     | H-1->LUMO (95%)                                                   |
| <b>568.7087</b> | 0.3422                     | H-2->LUMO (95%)                                                   |
| <b>537.4494</b> | 0.0088                     | H-3->LUMO (94%)                                                   |
| <b>524.0466</b> | 0.0094                     | HOMO->L+1 (93%)                                                   |
| <b>511.5493</b> | 0.0371                     | H-4->LUMO (60%), H-1->L+1 (28%)                                   |
| <b>500.5215</b> | 0.3441                     | H-4->LUMO (24%), H-1->L+1 (60%)                                   |
| <b>496.7713</b> | 0.0017                     | H-2->L+1 (79%), H-1->L+2 (16%)                                    |
| <b>489.4564</b> | 0.994                      | H-3->L+1 (15%), HOMO->L+2 (80%)                                   |
| <b>479.5552</b> | 0.0273                     | HOMO->L+3 (80%)                                                   |
| <b>478.6111</b> | 0.2025                     | H-3->L+1 (35%), H-1->L+3 (32%)                                    |
| <b>477.3029</b> | 0.0542                     | H-3->L+1 (10%), H-2->L+3 (25%), H-1->L+3 (22%), H-1->L+4 (28%)    |
| <b>475.5089</b> | 0.2098                     | HOMO->L+4 (78%)                                                   |
| <b>472.771</b>  | 0.217                      | H-3->L+1 (25%), H-2->L+4 (26%), H-1->L+3 (11%), H-1->L+4 (29%)    |
| <b>463.423</b>  | 0.0215                     | H-4->L+1 (11%), H-2->L+1 (15%), H-1->L+2 (66%)                    |
| <b>463.3364</b> | 0.1064                     | H-4->L+1 (53%), H-3->L+2 (20%), H-1->L+2 (13%)                    |
| <b>454.5375</b> | 0.324                      | H-2->L+2 (90%)                                                    |
| <b>443.6404</b> | 0.0014                     | H-2->L+3 (60%), H-1->L+3 (28%)                                    |
| <b>440.9268</b> | 0.0025                     | H-2->L+4 (56%), H-1->L+4 (33%)                                    |
| <b>440.1597</b> | 0.2033                     | H-4->L+4 (14%), H-3->L+3 (49%), H-3->L+4 (29%)                    |
| <b>437.5038</b> | 0.0033                     | H-4->L+3 (17%), H-3->L+3 (23%), H-3->L+4 (47%)                    |
| <b>436.2568</b> | 0.0048                     | H-4->L+1 (21%), H-3->L+2 (63%)                                    |
| <b>426.1064</b> | 0.0153                     | H-4->L+2 (80%)                                                    |
| <b>416.6976</b> | 0.0173                     | H-4->L+3 (69%), H-3->L+3 (13%)                                    |
| <b>409.8651</b> | 0.0297                     | H-4->L+4 (75%)                                                    |
| <b>405.6676</b> | 0.0208                     | H-5->LUMO (90%)                                                   |
| <b>399.215</b>  | 0.0005                     | H-6->LUMO (37%), HOMO->L+5 (44%)                                  |
| <b>394.741</b>  | 0.0153                     | H-7->LUMO (22%), HOMO->L+6 (70%)                                  |
| <b>391.8219</b> | 0.3489                     | H-8->LUMO (10%), H-1->L+5 (60%)                                   |
| <b>390.01</b>   | 0.0288                     | H-7->LUMO (23%), H-2->L+5 (17%), HOMO->L+6 (10%), HOMO->L+7 (35%) |
| <b>385.4031</b> | 0.0001                     | H-6->LUMO (46%), HOMO->L+5 (35%)                                  |
| <b>383.567</b>  | 0.0377                     | H-1->L+6 (79%)                                                    |
| <b>381.4194</b> | 0.0084                     | H-5->L+1 (21%), H-3->L+5 (15%), H-1->L+7 (34%)                    |
| <b>379.7605</b> | 0.0007                     | H-8->LUMO (22%), H-1->L+5 (21%), HOMO->L+8 (21%)                  |
| <b>379.1566</b> | 0.0037                     | H-7->LUMO (15%), H-2->L+5 (57%)                                   |
| <b>377.9084</b> | 0.0001                     | H-2->L+6 (67%), H-1->L+8 (14%)                                    |

|                 |        |                                                                    |
|-----------------|--------|--------------------------------------------------------------------|
| <b>372.6158</b> | 0.0384 | H-9->LUMO (24%), H-8->LUMO (18%), H-7->LUMO (12%), HOMO->L+7 (22%) |
| <b>371.7667</b> | 0.0538 | H-9->LUMO (22%), H-7->LUMO (16%), HOMO->L+7 (23%)                  |
| <b>370.8216</b> | 0.0013 | H-5->L+2 (11%), H-2->L+7 (39%), H-1->L+8 (10%)                     |
| <b>368.7043</b> | 0.001  | H-9->LUMO (15%), H-3->L+6 (49%)                                    |

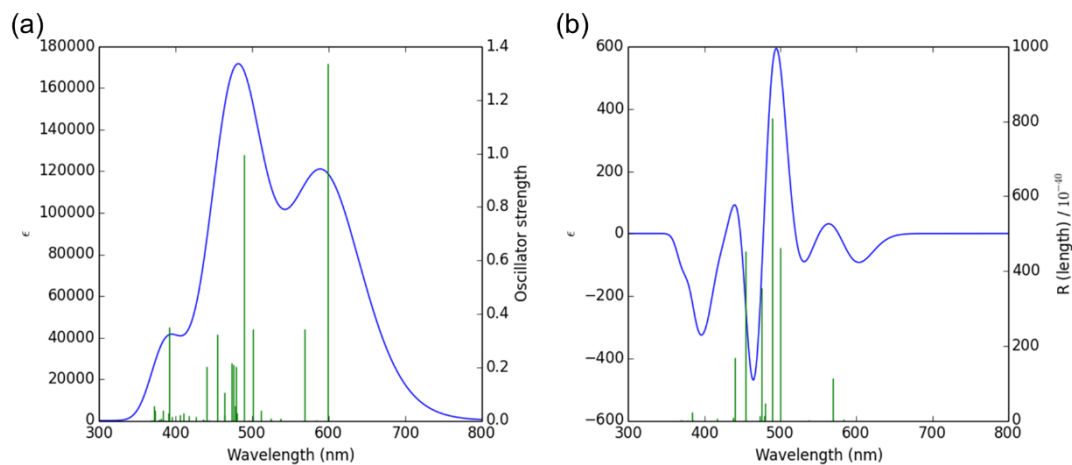

**Fig. S38.** Calculated (B3LYP-D3/6-31G(d,p)) (a) absorption spectrum of **1a-rac**, (b) CD spectrum of (*M,M*)-**1a-rac** in DCM.

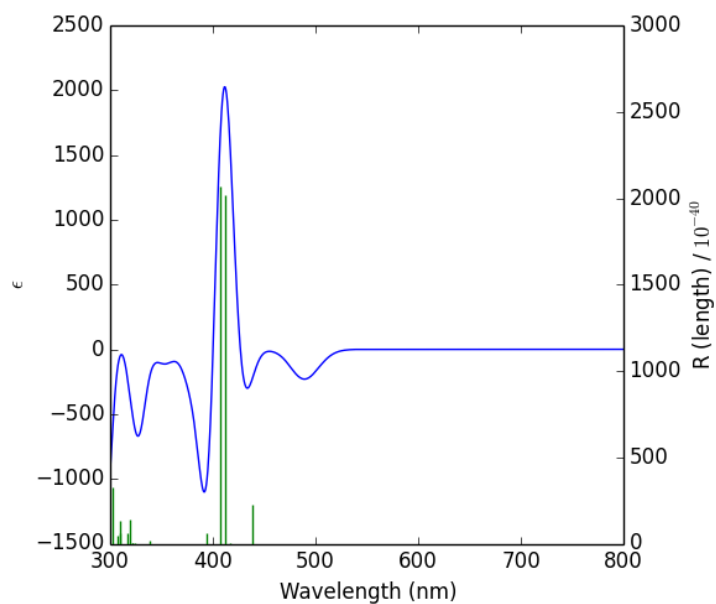

**Fig. S39.** Calculated (M06-2X/6-31G(d,p)) CD spectrum of (*M,M*)-**1a-rac** in DCM.

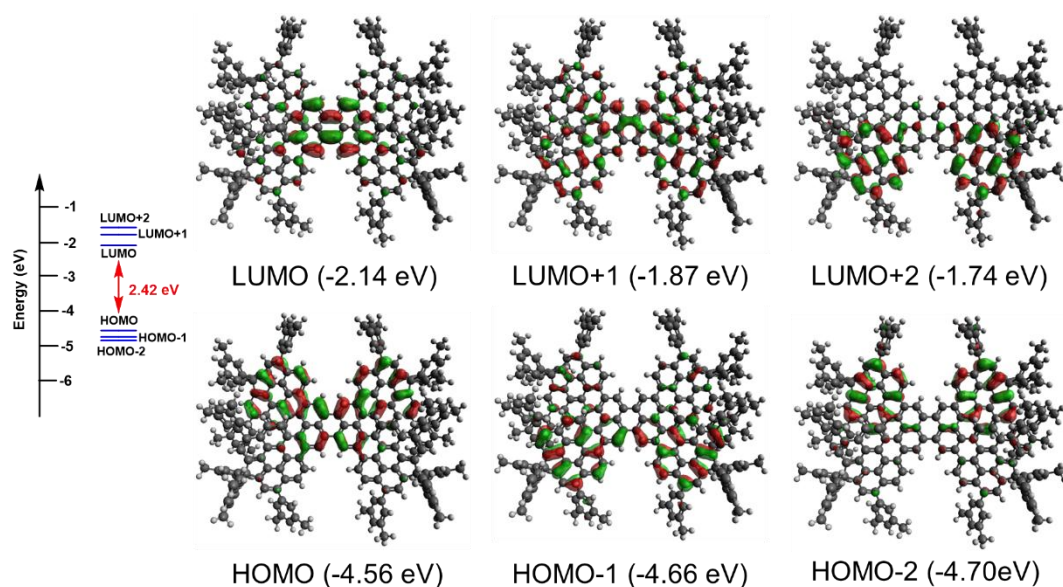

**Fig. S40.** Energy diagram and frontier molecular orbital profiles of **1a-meso** obtained by B3LYP-D3/6-31g(d,p) level calculation (isovalue = 0.02). The substituents are replaced by methyl groups during the calculations.

**Table S2.** Selected TD-DFT (B3LYP-D3/6-31G(d,p)) calculated wavelength, oscillator strength and compositions of major electronic transitions of **1a-meso**.

| Wavelength (nm) | Osc. Strength ( <i>f</i> ) | Major contribs                                                    |
|-----------------|----------------------------|-------------------------------------------------------------------|
| <b>602.948</b>  | 1.3464                     | HOMO->LUMO (97%)                                                  |
| <b>585.6599</b> | 0.0241                     | H-1->LUMO (93%)                                                   |
| <b>567.5633</b> | 0.3176                     | H-2->LUMO (94%)                                                   |
| <b>540.4716</b> | 0.0007                     | H-3->LUMO (94%)                                                   |
| <b>532.9673</b> | 0.0002                     | HOMO->L+1 (91%)                                                   |
| <b>518.3719</b> | 0.035                      | H-4->LUMO (62%), H-1->L+1 (28%)                                   |
| <b>506.6991</b> | 0.3558                     | H-4->LUMO (24%), H-1->L+1 (60%),<br>HOMO->L+4 (10%)               |
| <b>502.1433</b> | 0.0327                     | H-2->L+1 (74%), H-1->L+2 (13%)                                    |
| <b>495.4017</b> | 0.8551                     | H-3->L+1 (14%), HOMO->L+2 (69%)                                   |
| <b>484.1052</b> | 0.0837                     | H-3->L+1 (62%)                                                    |
| <b>483.4257</b> | 0.1728                     | HOMO->L+3 (84%)                                                   |
| <b>481.8475</b> | 0.1644                     | H-1->L+4 (15%), HOMO->L+4 (51%)                                   |
| <b>478.9438</b> | 0.086                      | H-2->L+3 (14%), H-1->L+4 (40%), HOMO->L+4<br>(27%)                |
| <b>477.5603</b> | 0.435                      | H-3->L+1 (11%), H-2->L+4 (25%), H-1->L+2<br>(22%), H-1->L+3 (32%) |
| <b>473.1138</b> | 0.0017                     | H-4->L+1 (63%), H-3->L+2 (18%)                                    |
| <b>466.0534</b> | 0.0059                     | H-2->L+1 (16%), H-1->L+2 (53%), H-1->L+3<br>(26%)                 |
| <b>456.546</b>  | 0.2623                     | H-2->L+2 (78%), H-2->L+3 (11%)                                    |
| <b>445.9703</b> | 0.2258                     | H-4->L+4 (14%), H-3->L+2 (32%), H-3->L+3<br>(34%)                 |

|          |        |                                                   |
|----------|--------|---------------------------------------------------|
| 444.1808 | 0.0024 | H-3->L+4 (12%), H-2->L+4 (51%), H-1->L+3 (20%)    |
| 443.9105 | 0.001  | H-3->L+2 (15%), H-2->L+3 (45%), H-1->L+4 (26%)    |
| 441.2563 | 0.0032 | H-4->L+3 (14%), H-3->L+4 (57%), H-2->L+4 (11%)    |
| 438.9132 | 0.0187 | H-4->L+1 (13%), H-3->L+2 (25%), H-3->L+3 (42%)    |
| 432.3622 | 0.0379 | H-4->L+2 (71%)                                    |
| 419.1629 | 0.0015 | H-4->L+3 (62%), H-3->L+4 (21%)                    |
| 415.6638 | 0.0379 | H-4->L+4 (75%), H-3->L+3 (17%)                    |
| 405.005  | 0.0016 | H-5->LUMO (89%)                                   |
| 400.3494 | 0.0021 | H-6->LUMO (30%), HOMO->L+5 (53%)                  |
| 398.7271 | 0.0002 | H-7->LUMO (24%), HOMO->L+6 (67%)                  |
| 392.6657 | 0.0036 | H-7->LUMO (15%), HOMO->L+6 (11%), HOMO->L+7 (51%) |
| 392.4668 | 0.3203 | H-1->L+5 (59%)                                    |
| 386.1233 | 0.0128 | H-2->L+8 (10%), H-1->L+6 (77%)                    |
| 385.955  | 0.0044 | H-6->LUMO (44%), HOMO->L+5 (26%)                  |
| 383.7332 | 0.0317 | H-5->L+1 (23%), H-3->L+5 (11%), H-1->L+7 (41%)    |
| 380.3546 | 0.0056 | H-9->LUMO (15%), H-1->L+5 (17%), HOMO->L+8 (30%)  |
| 379.679  | 0.0002 | H-2->L+5 (65%)                                    |
| 379.4002 | 0.0002 | H-2->L+6 (55%), H-1->L+8 (13%)                    |
| 376.3369 | 0.0005 | H-7->LUMO (44%), HOMO->L+6 (14%), HOMO->L+7 (30%) |
| 373.1317 | 0.1081 | H-9->LUMO (42%), H-8->LUMO (23%)                  |
| 372.0344 | 0.0331 | H-2->L+7 (34%)                                    |
| 371.0324 | 0.0256 | H-9->LUMO (15%), H-3->L+6 (50%)                   |

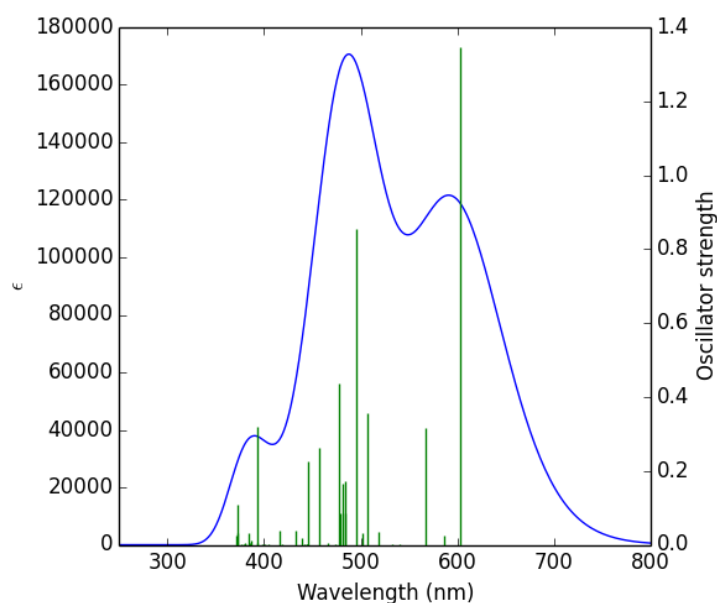

Fig. S41. Calculated (B3LYP-D3/6-31G(d,p)) (a) absorption spectrum of **1a-meso** in DCM.

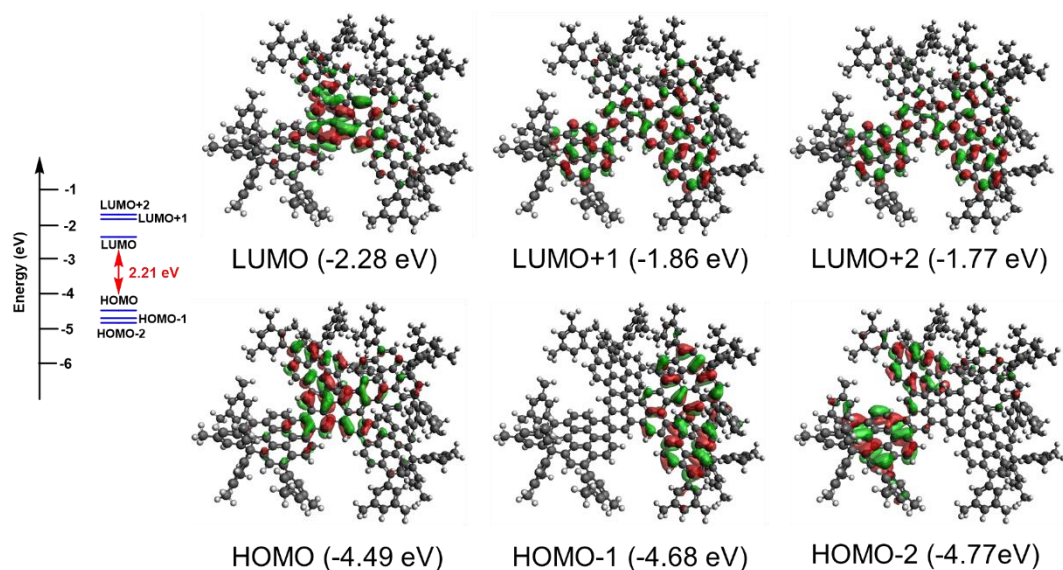

**Fig. S42.** Energy diagram and frontier molecular orbital profiles of **1b** obtained by B3LYP-D3/6-31g(d,p) level calculation (isovalue = 0.02). The substituents are replaced by methyl groups during the calculations.

**Table S3.** Selected TD-DFT (B3LYP-D3/6-31G(d,p)) calculated wavelength, oscillator strength and compositions of major electronic transitions of **1b**.

| Wavelength (nm) | Osc. Strength ( <i>f</i> ) | Major contribs                                                    |
|-----------------|----------------------------|-------------------------------------------------------------------|
| 672.3655        | 0.9252                     | HOMO->LUMO (99%)                                                  |
| 612.6004        | 0.0907                     | H-1->LUMO (94%)                                                   |
| 592.4038        | 0.1831                     | H-2->LUMO (96%)                                                   |
| 566.0862        | 0.04                       | H-3->LUMO (84%)                                                   |
| 550.4537        | 0.0598                     | HOMO->L+1 (81%)                                                   |
| 533.8853        | 0.0524                     | H-4->LUMO (75%), HOMO->L+2 (11%)                                  |
| 524.5788        | 0.3502                     | HOMO->L+2 (72%), HOMO->L+4 (10%)                                  |
| 508.5071        | 0.3629                     | H-1->L+1 (35%), HOMO->L+4 (44%)                                   |
| 507.3626        | 0.079                      | H-1->L+1 (10%), HOMO->L+3 (74%)                                   |
| 499.5535        | 0.0557                     | H-1->L+1 (40%), HOMO->L+3 (13%),<br>HOMO->L+4 (34%)               |
| 483.5766        | 0.0232                     | H-2->L+1 (56%), H-1->L+3 (22%)                                    |
| 483.2373        | 0.157                      | H-2->L+1 (21%), H-1->L+3 (61%)                                    |
| 476.6056        | 0.3192                     | H-3->L+1 (65%), H-2->L+2 (14%)                                    |
| 469.8685        | 0.0814                     | H-1->L+2 (65%)                                                    |
| 462.455         | 0.1344                     | H-4->L+1 (13%), H-2->L+2 (62%)                                    |
| 454.6375        | 0.0756                     | H-1->L+2 (12%), H-1->L+4 (54%)                                    |
| 451.6728        | 0.0091                     | H-3->L+3 (39%), H-2->L+3 (44%)                                    |
| 449.6254        | 0.4373                     | H-4->L+1 (24%), H-3->L+2 (20%), H-2->L+2<br>(11%), H-1->L+4 (22%) |
| 446.3395        | 0.3212                     | H-4->L+1 (13%), H-2->L+4 (61%)                                    |
| 441.1778        | 0.0091                     | H-4->L+1 (20%), H-3->L+2 (48%), H-2->L+4<br>(12%)                 |

|          |        |                                                                                     |
|----------|--------|-------------------------------------------------------------------------------------|
| 439.0064 | 0.0716 | H-4->L+3 (11%), H-3->L+3 (35%), H-2->L+3 (38%)                                      |
| 429.7397 | 0.1398 | H-5->LUMO (20%), H-4->L+2 (13%), HOMO->L+5 (32%)                                    |
| 427.5907 | 0.0219 | H-3->L+4 (77%)                                                                      |
| 426.5609 | 0.1389 | H-5->LUMO (11%), H-4->L+2 (53%), HOMO->L+5 (12%)                                    |
| 419.0921 | 0.0038 | H-4->L+3 (37%), HOMO->L+6 (29%)                                                     |
| 414.9821 | 0.0226 | H-6->LUMO (26%), H-4->L+3 (36%), HOMO->L+6 (19%)                                    |
| 411.361  | 0.0034 | H-7->LUMO (39%), H-6->LUMO (30%)                                                    |
| 411.0882 | 0.014  | H-4->L+4 (75%)                                                                      |
| 407.588  | 0.3341 | H-5->LUMO (31%), H-4->L+4 (10%), HOMO->L+5 (21%), HOMO->L+6 (14%)                   |
| 402.4546 | 0.1022 | H-8->LUMO (24%), H-7->LUMO (17%), HOMO->L+7 (27%)                                   |
| 400.0393 | 0.0425 | H-8->LUMO (15%), H-7->LUMO (18%), H-6->LUMO (19%), H-5->LUMO (12%), HOMO->L+6 (13%) |
| 392.5041 | 0.2224 | H-1->L+5 (65%)                                                                      |
| 389.6791 | 0.1603 | H-1->L+5 (14%), HOMO->L+7 (10%), HOMO->L+8 (52%)                                    |
| 384.185  | 0.2193 | H-2->L+5 (66%)                                                                      |
| 383.5314 | 0.0425 | H-1->L+6 (64%)                                                                      |
| 379.4118 | 0.1388 | H-8->LUMO (11%), H-3->L+5 (14%), H-1->L+8 (23%), HOMO->L+7 (11%)                    |
| 378.6239 | 0.2071 | H-8->LUMO (23%), H-1->L+8 (10%), HOMO->L+7 (17%)                                    |
| 376.6914 | 0.0664 | H-2->L+6 (69%)                                                                      |
| 373.0194 | 0.0121 | H-9->LUMO (83%)                                                                     |
| 371.1546 | 0.1144 | H-10->LUMO (14%), H-3->L+5 (43%)                                                    |

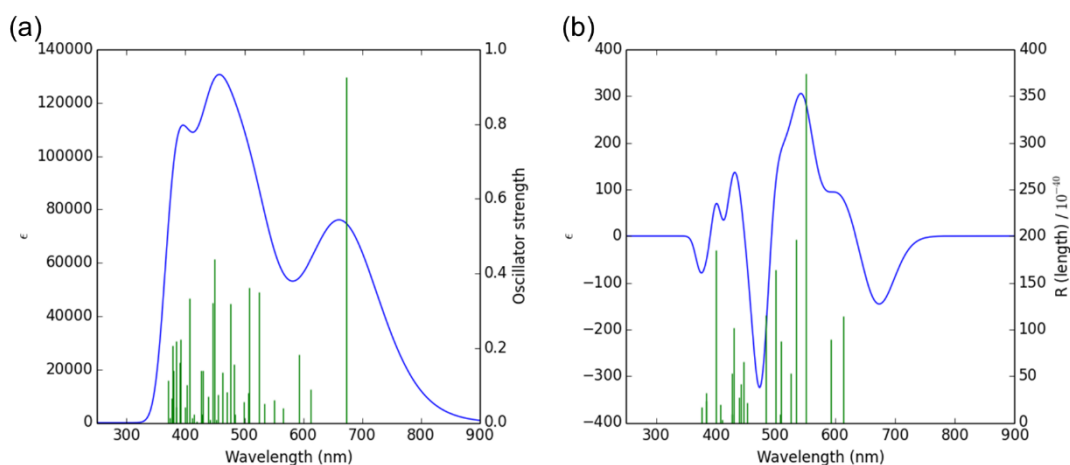

**Fig. S43.** Calculated (B3LYP-D3/6-31G(d,p)) (a) absorption spectrum of **1b**, (b) CD spectrum of (*P*)[5](*M*)[6]-**1b** in DCM.

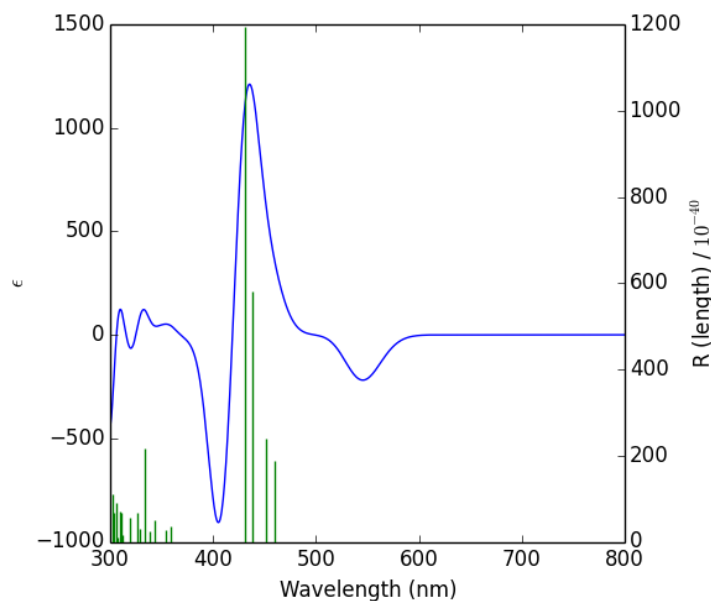

**Fig. S44.** Calculated (M06-2X/6-31G(d,p)) CD spectrum of (*P*)[5](*M*)[6]-**1b** in DCM.

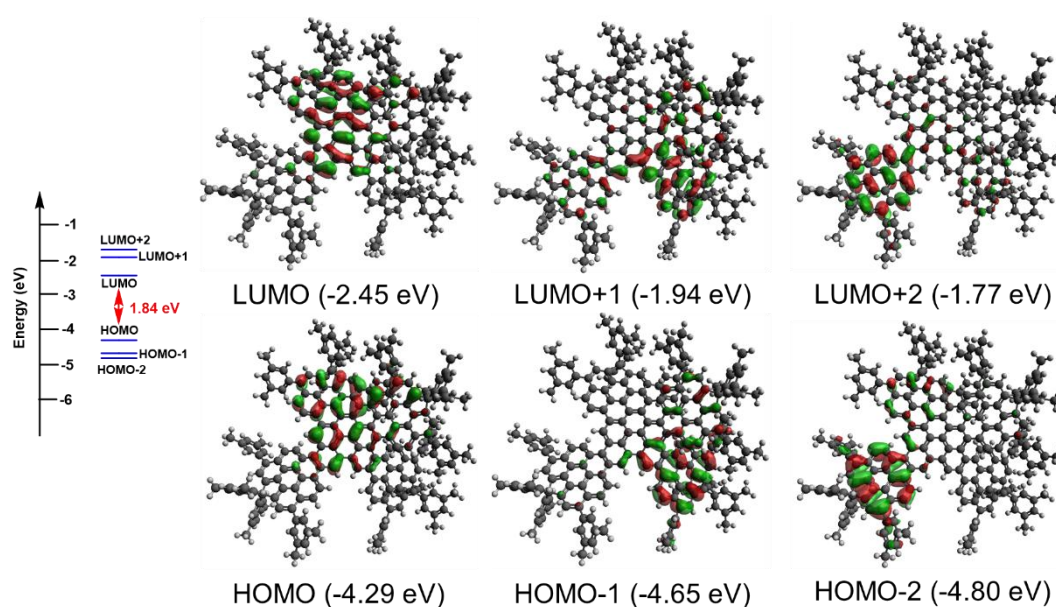

**Fig. S45.** Energy diagram and frontier molecular orbital profiles of **1c** obtained by B3LYP-D3/6-31g(d,p) level calculation (isovalue = 0.02). The substituents are replaced by methyl groups during the calculations.

**Table S4.** Selected TD-DFT (B3LYP-D3/6-31G(d,p)) calculated wavelength, oscillator strength and compositions of major electronic transitions of **1c**.

| Wavelength (nm) | Osc. Strength ( <i>f</i> ) | Major contribs   |
|-----------------|----------------------------|------------------|
| <b>783.1735</b> | 0.9718                     | HOMO->LUMO (99%) |

|          |        |                                                                                                           |
|----------|--------|-----------------------------------------------------------------------------------------------------------|
| 668.1623 | 0.1217 | H-1->LUMO (88%)                                                                                           |
| 629.2975 | 0.1004 | H-3->LUMO (13%), H-2->LUMO (76%)                                                                          |
| 618.19   | 0.1979 | HOMO->L+1 (81%)                                                                                           |
| 608.6607 | 0.0213 | H-3->LUMO (77%), H-2->LUMO (10%)                                                                          |
| 564.2827 | 0.42   | HOMO->L+2 (84%)                                                                                           |
| 550.4537 | 0.0069 | HOMO->L+3 (88%)                                                                                           |
| 539.6013 | 0.0686 | H-4->LUMO (77%), HOMO->L+4 (10%)                                                                          |
| 530.4364 | 0.1193 | H-1->L+1 (70%), HOMO->L+4 (22%)                                                                           |
| 519.7191 | 0.0502 | H-4->LUMO (12%), H-1->L+1 (19%),<br>HOMO->L+4 (63%)                                                       |
| 494.4731 | 0.0675 | H-3->L+1 (80%), H-2->L+1 (13%)                                                                            |
| 490.4244 | 0.0474 | H-2->L+1 (72%), H-1->L+3 (10%)                                                                            |
| 485.0712 | 0.3339 | H-1->L+2 (20%), H-1->L+3 (61%)                                                                            |
| 474.6533 | 0.0133 | H-2->L+2 (10%), H-1->L+2 (61%), H-1->L+3<br>(20%)                                                         |
| 464.7781 | 0.0225 | H-6->LUMO (17%), H-5->LUMO (14%),<br>HOMO->L+5 (26%), HOMO->L+6 (20%)                                     |
| 462.3343 | 0.3419 | H-2->L+2 (71%)                                                                                            |
| 453.6228 | 0.0195 | H-6->LUMO (15%), H-5->LUMO (18%), H-<br>4->L+1 (11%), H-1->L+4 (11%), HOMO->L+5<br>(20%), HOMO->L+6 (11%) |
| 448.2599 | 0.1626 | H-3->L+3 (77%)                                                                                            |
| 443.1489 | 0.0112 | H-6->LUMO (11%), H-1->L+4 (44%),<br>HOMO->L+6 (11%)                                                       |
| 442.0271 | 0.0795 | H-6->LUMO (14%), H-5->LUMO (19%),<br>HOMO->L+5 (21%), HOMO->L+6 (14%)                                     |
| 440.0035 | 0.0501 | H-3->L+2 (65%)                                                                                            |
| 436.8102 | 0.0685 | H-4->L+1 (44%), H-2->L+3 (11%), H-1->L+4<br>(10%)                                                         |
| 435.2155 | 0.0406 | H-2->L+3 (73%)                                                                                            |
| 430.7699 | 0.5217 | H-6->LUMO (22%), H-4->L+1 (12%),<br>HOMO->L+6 (11%), HOMO->L+7 (31%)                                      |
| 428.4625 | 0.3831 | H-8->LUMO (11%), H-5->LUMO (20%),<br>HOMO->L+7 (31%)                                                      |
| 421.7149 | 0.2798 | H-3->L+4 (11%), H-2->L+4 (76%)                                                                            |
| 418.6534 | 0.1201 | H-7->LUMO (54%), HOMO->L+8 (30%)                                                                          |
| 414.3164 | 0.0749 | H-7->LUMO (22%), HOMO->L+8 (44%)                                                                          |
| 413.7496 | 0.1535 | H-3->L+4 (63%), H-2->L+4 (10%)                                                                            |
| 408.1515 | 0.1059 | H-9->LUMO (24%), H-8->LUMO (22%), H-<br>4->L+2 (26%)                                                      |
| 407.1864 | 0.1269 | H-9->LUMO (20%), H-4->L+2 (45%)                                                                           |
| 403.9626 | 0.2805 | H-9->LUMO (23%), H-8->LUMO (32%)                                                                          |
| 400.634  | 0.2184 | H-4->L+3 (33%), H-1->L+5 (35%)                                                                            |
| 398.8169 | 0.0611 | H-1->L+5 (10%), HOMO->L+9 (58%)                                                                           |
| 397.6274 | 0.025  | H-4->L+3 (40%), H-1->L+5 (26%)                                                                            |
| 395.8248 | 0.0157 | H-16->LUMO (28%), H-12->LUMO (27%), H-<br>11->LUMO (10%), H-10->LUMO (11%)                                |
| 391.031  | 0.0444 | H-16->LUMO (29%), H-10->LUMO (23%)                                                                        |
| 388.1177 | 0.2063 | H-2->L+5 (32%), H-1->L+7 (10%)                                                                            |
| 386.7255 | 0.0985 | H-14->LUMO (47%), H-12->LUMO (16%)                                                                        |
| 384.471  | 0.0113 | H-18->LUMO (17%), H-13->LUMO (30%), H-<br>11->LUMO (22%)                                                  |

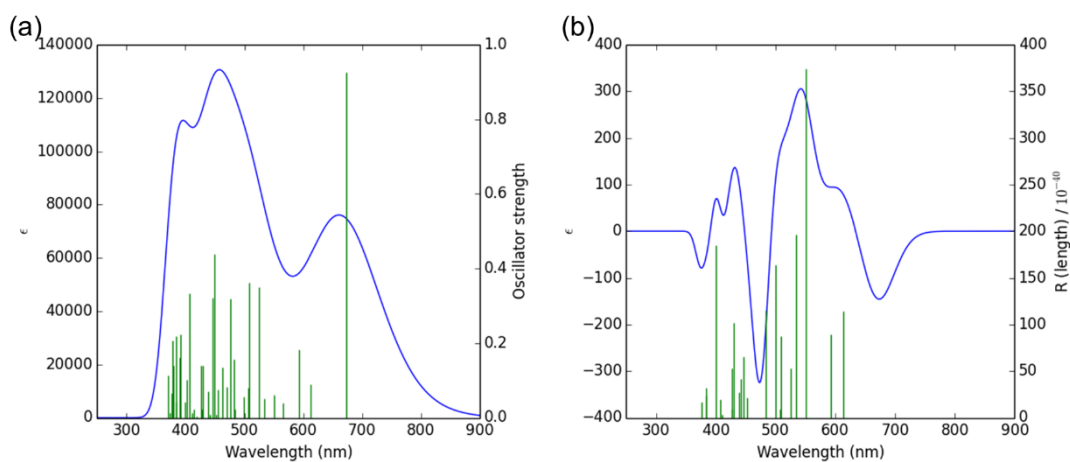

**Fig. S46.** Calculated (B3LYP-D3/6-31G(d,p)) (a) absorption spectrum of **1c**, (b) CD spectrum of (*P*)[4](*M*)[6]-**1c** in DCM.

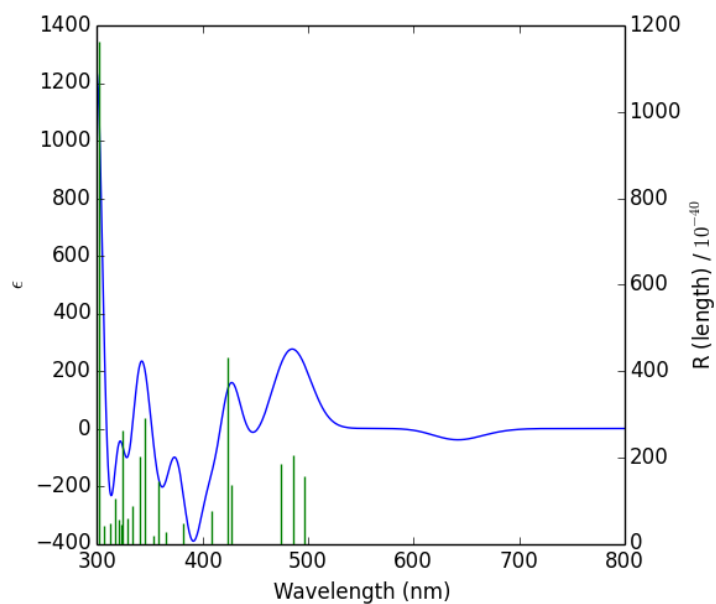

**Fig. S47.** Calculated (M06-2X/6-31G(d,p)) CD spectrum of (*P*)[4](*M*)[6]-**1c** in DCM.

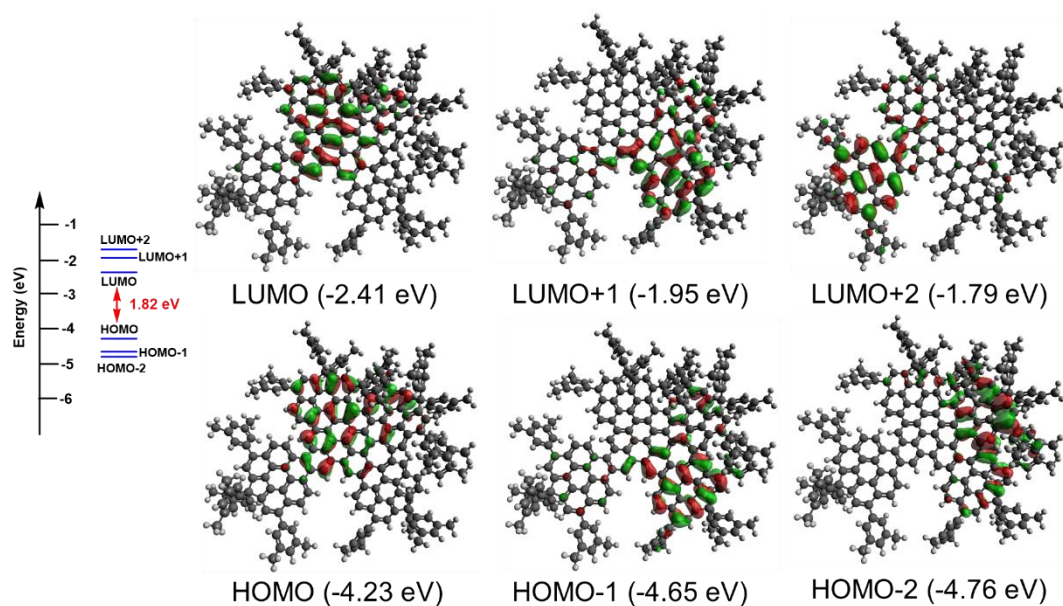

**Fig. S48.** Energy diagram and frontier molecular orbital profiles of **1d** obtained by B3LYP-D3/6-31g(d,p) level calculation (isovalue = 0.02). The substituents are replaced by methyl groups during the calculations.

**Table S5.** Selected TD-DFT (B3LYP-D3/6-31G(d,p)) calculated wavelength, oscillator strength and compositions of major electronic transitions of **1d**.

| Wavelength (nm) | Osc. Strength ( <i>f</i> ) | Major contribs                                    |
|-----------------|----------------------------|---------------------------------------------------|
| <b>792.1806</b> | 0.9797                     | HOMO->LUMO (99%)                                  |
| <b>661.3196</b> | 0.0484                     | H-1->LUMO (68%), HOMO->L+1 (19%)                  |
| <b>630.8986</b> | 0.1764                     | H-2->LUMO (14%), H-1->LUMO (30%), HOMO->L+1 (46%) |
| <b>628.0861</b> | 0.1692                     | H-3->LUMO (24%), H-2->LUMO (39%), HOMO->L+1 (32%) |
| <b>616.9596</b> | 0.0468                     | H-3->LUMO (59%), H-2->LUMO (33%)                  |
| <b>582.6872</b> | 0.4005                     | HOMO->L+2 (87%)                                   |
| <b>553.2539</b> | 0.0545                     | H-4->LUMO (76%)                                   |
| <b>539.6483</b> | 0.0558                     | H-4->LUMO (10%), HOMO->L+3 (62%), HOMO->L+4 (11%) |
| <b>527.9967</b> | 0.1168                     | H-1->L+1 (41%), HOMO->L+3 (21%), HOMO->L+4 (31%)  |
| <b>523.5598</b> | 0.0953                     | H-1->L+1 (43%), HOMO->L+4 (43%)                   |
| <b>509.8663</b> | 0.0239                     | H-3->L+1 (94%)                                    |
| <b>491.8446</b> | 0.0828                     | H-2->L+1 (86%)                                    |
| <b>489.2053</b> | 0.0124                     | HOMO->L+5 (90%)                                   |
| <b>481.7539</b> | 0.0882                     | H-1->L+2 (77%)                                    |
| <b>472.6629</b> | 0.0033                     | H-6->LUMO (18%), HOMO->L+6 (57%)                  |
| <b>468.8379</b> | 0.3076                     | H-2->L+2 (73%), H-1->L+2 (11%)                    |
| <b>457.2532</b> | 0.1267                     | H-1->L+3 (47%), H-1->L+4 (21%)                    |
| <b>455.2719</b> | 0.0638                     | H-3->L+2 (60%), HOMO->L+6 (11%)                   |

|                 |        |                                                                                   |
|-----------------|--------|-----------------------------------------------------------------------------------|
| <b>452.365</b>  | 0.0496 | H-5->LUMO (11%), H-4->L+1 (22%), H-3->L+2 (21%), H-1->L+3 (20%)                   |
| <b>447.2896</b> | 0.0306 | H-6->LUMO (17%), H-1->L+4 (13%), HOMO->L+8 (43%)                                  |
| <b>445.3615</b> | 0.0241 | H-6->LUMO (10%), H-5->LUMO (30%), H-4->L+1 (17%)                                  |
| <b>440.77</b>   | 0.0788 | H-7->LUMO (17%), H-4->L+1 (12%), H-1->L+4 (18%), HOMO->L+7 (20%), HOMO->L+8 (16%) |
| <b>439.3175</b> | 0.1542 | H-3->L+3 (45%)                                                                    |
| <b>437.0565</b> | 0.2135 | H-4->L+1 (15%), H-1->L+4 (19%), HOMO->L+7 (34%)                                   |
| <b>430.1571</b> | 0.2392 | H-7->LUMO (19%), H-5->LUMO (28%), HOMO->L+7 (11%)                                 |
| <b>426.6637</b> | 0.2716 | H-3->L+4 (12%), H-2->L+3 (28%), H-2->L+4 (45%)                                    |
| <b>425.2879</b> | 0.6895 | H-7->LUMO (29%), H-6->LUMO (21%), H-3->L+4 (14%), HOMO->L+8 (12%)                 |
| <b>423.5156</b> | 0.0803 | H-3->L+4 (27%), H-2->L+3 (15%), H-1->L+5 (38%)                                    |
| <b>422.2607</b> | 0.1264 | H-3->L+3 (14%), H-3->L+4 (13%), H-3->L+5 (13%), H-1->L+5 (30%)                    |
| <b>418.2156</b> | 0.4    | H-4->L+2 (63%)                                                                    |
| <b>416.4037</b> | 0.0447 | H-3->L+5 (42%), H-2->L+3 (22%), H-2->L+4 (13%)                                    |
| <b>414.996</b>  | 0.2229 | H-4->L+2 (19%), H-3->L+5 (18%), H-2->L+3 (10%), H-2->L+4 (28%)                    |
| <b>408.2053</b> | 0.2039 | H-8->LUMO (35%), HOMO->L+9 (19%)                                                  |
| <b>406.9459</b> | 0.0201 | H-11->LUMO (11%), HOMO->L+9 (59%)                                                 |
| <b>404.5953</b> | 0.0207 | H-10->LUMO (10%), H-9->LUMO (37%), H-8->LUMO (22%)                                |
| <b>400.8671</b> | 0.1067 | H-11->LUMO (13%), H-10->LUMO (14%), H-9->LUMO (42%)                               |
| <b>399.9619</b> | 0.0331 | H-4->L+3 (10%), H-1->L+6 (46%)                                                    |
| <b>396.7621</b> | 0.1695 | H-2->L+5 (58%)                                                                    |
| <b>392.6533</b> | 0.0696 | H-14->LUMO (10%), H-13->LUMO (12%), H-12->LUMO (22%), H-10->LUMO (29%)            |
| <b>389.202</b>  | 0.1793 | H-4->L+3 (51%), H-4->L+4 (14%)                                                    |

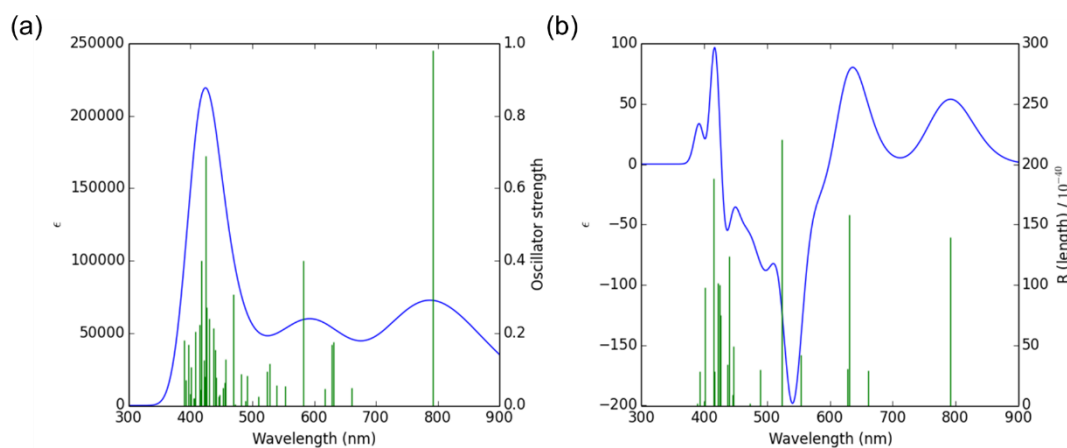

**Fig. S49.** Calculated (B3LYP-D3/6-31G(d,p)) (a) absorption spectrum of **1d**, (b) CD spectrum of (*M*)-**1d** in DCM.

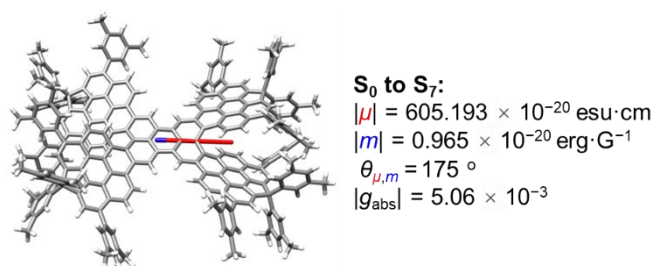

**Fig. S50.** Calculated transition dipole moments for S<sub>0</sub> to S<sub>7</sub> of **1a-rac**. The  $\mu$  vector is shown in red, and the  $m$  vector is shown in blue. The length of the  $\mu$  vector is reduced 100 times when the length of the  $m$  vector is amplified 10 times for clarity. Calculated by TD-DFT at the B3LYP-D3-6-31G(d,p) level.

## 5. X-ray crystallographic analysis

Crystallographic data have been deposited with the Cambridge Crystallographic Data Centre as supplementary publication no. CCDC 2491985 for **3**, no. CCDC 2491986 for **4**, no. CCDC 2491987 for **7**, no. CCDC 2491988 for **1a-meso**, no. CCDC 2491989 for **1b** and no. CCDC 2491990 for **1c**. The single crystal X-ray diffraction studies were performed at low temperature (T=100 K or 106 K) by using a four circles goniometer Kappa geometry, Bruker AXS D8 Venture, equipped with a Photon 100 CMOS active pixel sensor detector. Frames were integrated with the Bruker SAINT8 software package. Data were corrected for absorption effects using the multi-scan method (SADABS).<sup>[8]</sup> The structures were solved with the software SHELXT,<sup>[9]</sup> using a Dual Space method. Refinement of the structures were performed by least squares procedures on weighted F<sup>2</sup> values using the SHELXL version 2014/6<sup>[10]</sup> included in the WinGx system programs for Windows.<sup>[11]</sup> For more detailed information about diffraction data collection and refinement parameters, see Table S7 for **3**, Table S8 for **4**, Table S9 for **7**, Table S10 for **1a-meso**, Table S11 for **1b**, Table S12 for **1c**.

**Table S6.** Crystal data and structure refinement for **3**.

|                     |                                 |
|---------------------|---------------------------------|
| Identification code | CCDC2491985                     |
| Empirical formula   | C <sub>77</sub> H <sub>92</sub> |
| Formula weight      | 1017.50                         |
| Temperature/K       | 100.00                          |
| Crystal system      | triclinic                       |
| Space group         | P-1                             |
| a/Å                 | 10.7993(4)                      |
| b/Å                 | 17.2568(6)                      |

|                                               |                                                                |
|-----------------------------------------------|----------------------------------------------------------------|
| $c/\text{\AA}$                                | 17.2568(6)                                                     |
| $\alpha/^\circ$                               | 98.46                                                          |
| $\beta/^\circ$                                | 93.24                                                          |
| $\gamma/^\circ$                               | 93.24                                                          |
| Volume/ $\text{\AA}^3$                        | 3169.0(2)                                                      |
| $Z$                                           | 2                                                              |
| $\rho_{\text{calc}}/\text{cm}^3$              | 1.066                                                          |
| $\mu/\text{mm}^{-1}$                          | 0.441                                                          |
| $F(000)$                                      | 1108.0                                                         |
| Crystal size/ $\text{mm}^3$                   | $0.647 \times 0.126 \times 0.09$                               |
| Radiation                                     | CuK $\alpha$ ( $\lambda = 1.54178$ )                           |
| $2\Theta$ range for data collection/ $^\circ$ | 5.188 to 133.998                                               |
| Index ranges                                  | $-11 \leq h \leq 12, -20 \leq k \leq 20, -20 \leq l \leq 20$   |
| Reflections collected                         | 70008                                                          |
| Independent reflections                       | 11042 [ $R_{\text{int}} = 0.0711, R_{\text{sigma}} = 0.0532$ ] |
| Data/restraints/parameters                    | 11042/1216/1093                                                |
| Goodness-of-fit on $F^2$                      | 1.030                                                          |
| Final R indexes [ $I \geq 2\sigma(I)$ ]       | $R_1 = 0.0703, wR_2 = 0.1748$                                  |
| Final R indexes [all data]                    | $R_1 = 0.0962, wR_2 = 0.1946$                                  |
| Largest diff. peak/hole / $e \text{\AA}^{-3}$ | 0.60/-0.50                                                     |

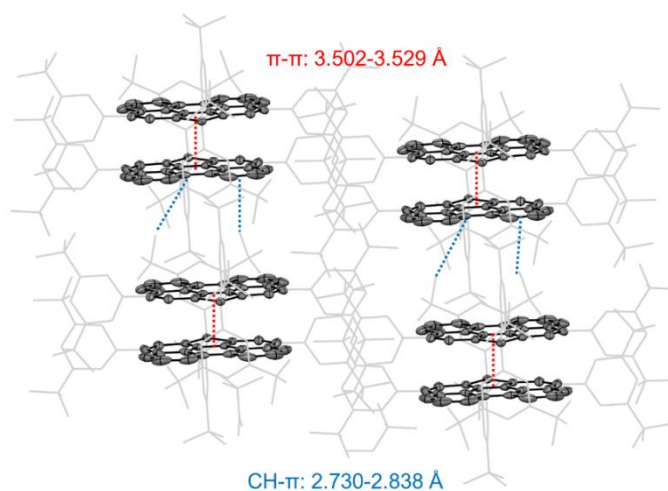

**Fig. S51.** 2D crystal-packing structure of **3** showing close  $\pi$ - $\pi$  contacts and  $[\text{CH}\cdots\pi]$  interactions.

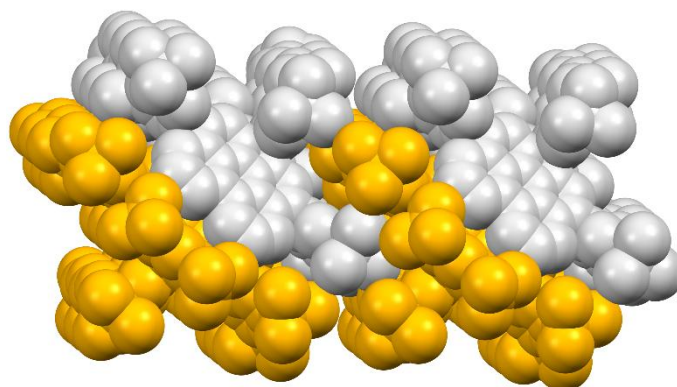

**Fig. S52.** 3D packing structure of **3** with space-filling model.

**Table S7.** Crystal data and structure refinement for **4**.

|                                               |                                                                |
|-----------------------------------------------|----------------------------------------------------------------|
| Identification code                           | CCDC2491986                                                    |
| Empirical formula                             | $C_{77.5}H_{92.5}BrCl_{0.5}O_{0.25}$                           |
| Formula weight                                | 1134.26                                                        |
| Temperature/K                                 | 106.00                                                         |
| Crystal system                                | triclinic                                                      |
| Space group                                   | P-1                                                            |
| $a/\text{\AA}$                                | 17.0845(5)                                                     |
| $b/\text{\AA}$                                | 18.9701(5)                                                     |
| $c/\text{\AA}$                                | 23.5086(7)                                                     |
| $\alpha/^\circ$                               | 91.828(2)                                                      |
| $\beta/^\circ$                                | 92.765(2)                                                      |
| $\gamma/^\circ$                               | 111.670(2)                                                     |
| Volume/ $\text{\AA}^3$                        | 7062.1(4)                                                      |
| $Z$                                           | 4                                                              |
| $\rho_{\text{calc}}/\text{cm}^3$              | 1.067                                                          |
| $\mu/\text{mm}^{-1}$                          | 1.336                                                          |
| $F(000)$                                      | 2428.0                                                         |
| Crystal size/ $\text{mm}^3$                   | $0.133 \times 0.127 \times 0.109$                              |
| Radiation                                     | $\text{CuK}\alpha$ ( $\lambda = 1.54178$ )                     |
| $2\theta$ range for data collection/ $^\circ$ | 3.768 to 133.628                                               |
| Index ranges                                  | $-20 \leq h \leq 19, -22 \leq k \leq 22, -28 \leq l \leq 27$   |
| Reflections collected                         | 179106                                                         |
| Independent reflections                       | 24751 [ $R_{\text{int}} = 0.0522, R_{\text{sigma}} = 0.0302$ ] |
| Data/restraints/parameters                    | 24751/406/1635                                                 |

|                                                |                                  |
|------------------------------------------------|----------------------------------|
| Goodness-of-fit on $F^2$                       | 1.026                            |
| Final R indexes [ $I \geq 2\sigma(I)$ ]        | $R_1 = 0.0544$ , $wR_2 = 0.1396$ |
| Final R indexes [all data]                     | $R_1 = 0.0639$ , $wR_2 = 0.1454$ |
| Largest diff. peak/hole / $e \text{ \AA}^{-3}$ | 0.74/-0.77                       |

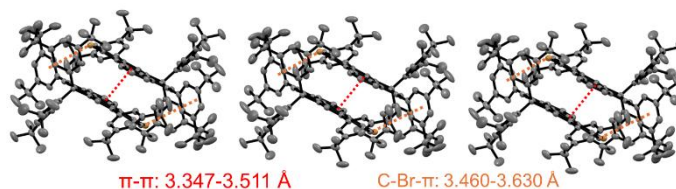

**Fig. S53.** 2D crystal-packing structure of **4** showing close  $\pi$ - $\pi$  contacts and [C-Br $\cdots$  $\pi$ ] interactions.

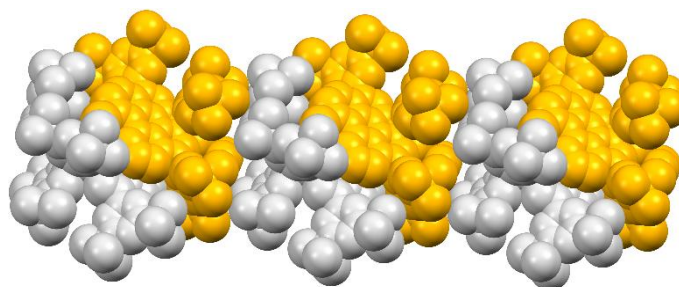

**Fig. S54.** 3D packing structure of **4** with space-filling model.

**Table S8.** Crystal data and structure refinement for **7**.

|                                  |                         |
|----------------------------------|-------------------------|
| Identification code              | CCDC2491987             |
| Empirical formula                | $C_{346}H_{404}Cl_{36}$ |
| Formula weight                   | 5838.87                 |
| Temperature/K                    | 100.00                  |
| Crystal system                   | triclinic               |
| Space group                      | P-1                     |
| $a/\text{\AA}$                   | 15.7143(11)             |
| $b/\text{\AA}$                   | 20.9969(12)             |
| $c/\text{\AA}$                   | 25.8490(17)             |
| $\alpha/^\circ$                  | 99.950(4)               |
| $\beta/^\circ$                   | 93.203(5)               |
| $\gamma/^\circ$                  | 90.623(4)               |
| Volume/ $\text{\AA}^3$           | 8385.7(9)               |
| Z                                | 1                       |
| $\rho_{\text{calc}}/\text{cm}^3$ | 1.156                   |

|                                                |                                                                |
|------------------------------------------------|----------------------------------------------------------------|
| $\mu/\text{mm}^{-1}$                           | 3.053                                                          |
| F(000)                                         | 3092.0                                                         |
| Crystal size/ $\text{mm}^3$                    | $0.96 \times 0.108 \times 0.071$                               |
| Radiation                                      | CuK $\alpha$ ( $\lambda = 1.54178$ )                           |
| 2 $\Theta$ range for data collection/ $^\circ$ | 5.02 to 134.34                                                 |
| Index ranges                                   | $-16 \leq h \leq 18, -24 \leq k \leq 24, -29 \leq l \leq 30$   |
| Reflections collected                          | 137494                                                         |
| Independent reflections                        | 29009 [ $R_{\text{int}} = 0.1518, R_{\text{sigma}} = 0.1682$ ] |
| Data/restraints/parameters                     | 29009/328/1712                                                 |
| Goodness-of-fit on $F^2$                       | 1.194                                                          |
| Final R indexes [ $I \geq 2\sigma(I)$ ]        | $R_1 = 0.1320, wR_2 = 0.3579$                                  |
| Final R indexes [all data]                     | $R_1 = 0.1893, wR_2 = 0.3962$                                  |
| Largest diff. peak/hole / $e \text{ \AA}^{-3}$ | 0.73/-0.64                                                     |

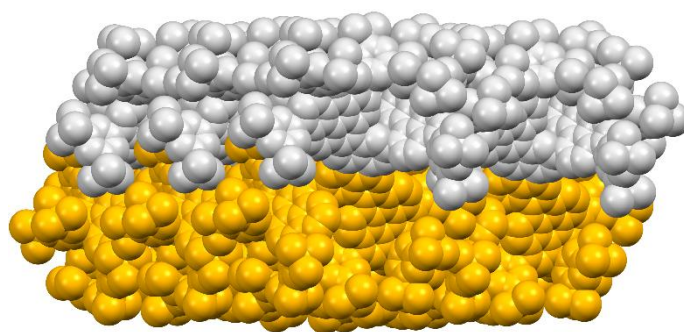

**Fig. S55.** 3D packing structure of **7** with space-filling model.

**Table S9.** Crystal data and structure refinement for **1a-meso**.

|                     |                                              |
|---------------------|----------------------------------------------|
| Identification code | CCDC2491988                                  |
| Empirical formula   | $\text{C}_{400}\text{H}_{412}\text{Cl}_{24}$ |
| Formula weight      | 6070.07                                      |
| Temperature/K       | 100.00                                       |
| Crystal system      | triclinic                                    |
| Space group         | P-1                                          |
| $a/\text{\AA}$      | 13.7074(14)                                  |
| $b/\text{\AA}$      | 25.091(3)                                    |
| $c/\text{\AA}$      | 26.998(3)                                    |
| $\alpha/^\circ$     | 68.915(9)                                    |
| $\beta/^\circ$      | 75.476(8)                                    |

|                                                |                                                                |
|------------------------------------------------|----------------------------------------------------------------|
| $\gamma/^\circ$                                | 80.514(9)                                                      |
| Volume/ $\text{\AA}^3$                         | 8358.2(18)                                                     |
| Z                                              | 1                                                              |
| $\rho_{\text{calc}}/\text{cm}^3$               | 1.206                                                          |
| $\mu/\text{mm}^{-1}$                           | 2.225                                                          |
| F(000)                                         | 3220.0                                                         |
| Crystal size/ $\text{mm}^3$                    | $0.151 \times 0.092 \times 0.06$                               |
| Radiation                                      | CuK $\alpha$ ( $\lambda = 1.54178$ )                           |
| 2 $\Theta$ range for data collection/ $^\circ$ | 6.024 to 133.18                                                |
| Index ranges                                   | $-16 \leq h \leq 15, -29 \leq k \leq 27, -32 \leq l \leq 32$   |
| Reflections collected                          | 115713                                                         |
| Independent reflections                        | 28666 [ $R_{\text{int}} = 0.2511, R_{\text{sigma}} = 0.2120$ ] |
| Data/restraints/parameters                     | 28666/3304/1525                                                |
| Goodness-of-fit on $F^2$                       | 0.892                                                          |
| Final R indexes [ $I \geq 2\sigma(I)$ ]        | $R_1 = 0.1669, wR_2 = 0.3830$                                  |
| Final R indexes [all data]                     | $R_1 = 0.4133, wR_2 = 0.5735$                                  |
| Largest diff. peak/hole / $e \text{\AA}^{-3}$  | 0.36/-0.27                                                     |

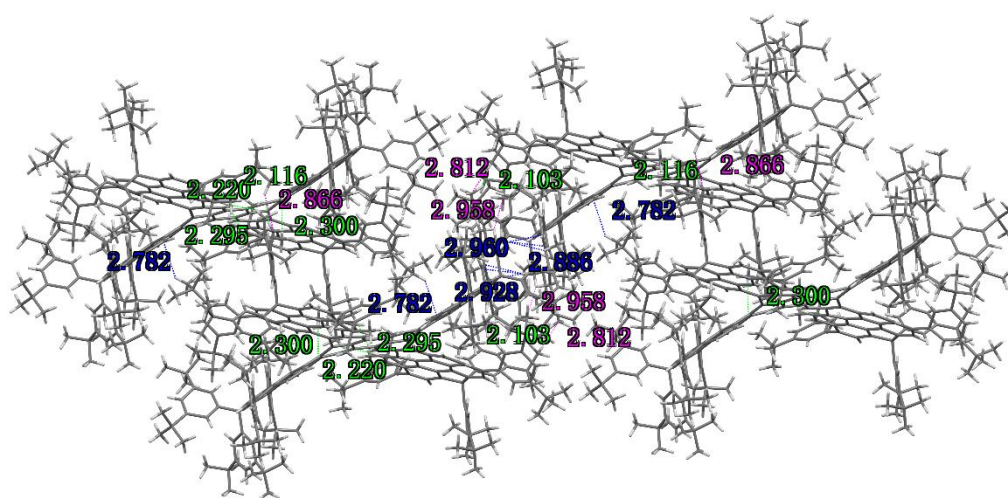

**Fig. S56.** 2D crystal-packing structure of **1a-meso** showing close [C-H $\cdots$  $\pi$ ], [C-H $\cdots$ C-H] and [C-H $\cdots$ C] interactions, labeled in blue, green and magenta, respectively.

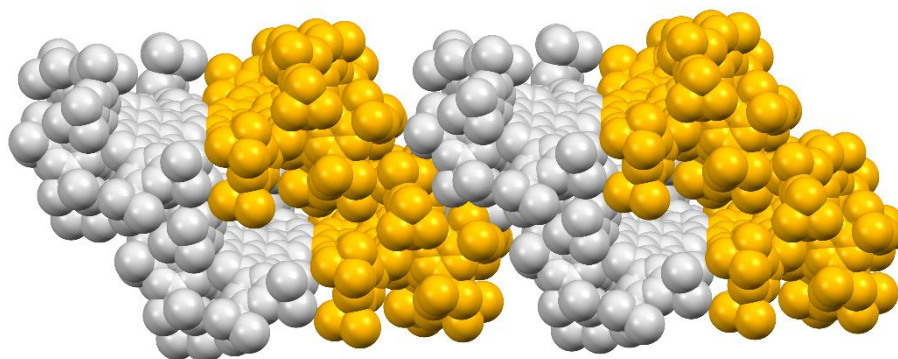

**Fig. S57.** 3D packing structure of **1a-meso** with space-filling model.

**Table S10.** Crystal data and structure refinement for **1b**.

|                                        |                                                                |
|----------------------------------------|----------------------------------------------------------------|
| Identification code                    | CCDC2491989                                                    |
| Empirical formula                      | C <sub>344.89</sub> H <sub>378.68</sub> Cl <sub>3.74</sub>     |
| Formula weight                         | 4656.30                                                        |
| Temperature/K                          | 100.00                                                         |
| Crystal system                         | triclinic                                                      |
| Space group                            | P-1                                                            |
| a/Å                                    | 14.4516(13)                                                    |
| b/Å                                    | 28.598(2)                                                      |
| c/Å                                    | 39.034(3)                                                      |
| $\alpha$ /°                            | 101.304(6)                                                     |
| $\beta$ /°                             | 91.702(6)                                                      |
| $\gamma$ /°                            | 101.051(6)                                                     |
| Volume/Å <sup>3</sup>                  | 15488(2)                                                       |
| Z                                      | 2                                                              |
| $\rho_{\text{calc}}/\text{cm}^3$       | 0.998                                                          |
| $\mu/\text{mm}^{-1}$                   | 0.705                                                          |
| F(000)                                 | 5023.0                                                         |
| Crystal size/mm <sup>3</sup>           | 0.403 × 0.078 × 0.059                                          |
| Radiation                              | CuK $\alpha$ ( $\lambda$ = 1.54178)                            |
| 2 $\theta$ range for data collection/° | 4.332 to 134.072                                               |
| Index ranges                           | -17 ≤ h ≤ 17, -33 ≤ k ≤ 30, -46 ≤ l ≤ 46                       |
| Reflections collected                  | 283312                                                         |
| Independent reflections                | 54159 [R <sub>int</sub> = 0.1473, R <sub>sigma</sub> = 0.1060] |
| Data/restraints/parameters             | 54159/4718/4685                                                |
| Goodness-of-fit on F <sup>2</sup>      | 1.186                                                          |

|                                                |                                  |
|------------------------------------------------|----------------------------------|
| Final R indexes [ $I \geq 2\sigma(I)$ ]        | $R_1 = 0.1179$ , $wR_2 = 0.3192$ |
| Final R indexes [all data]                     | $R_1 = 0.1814$ , $wR_2 = 0.3797$ |
| Largest diff. peak/hole / $e \text{ \AA}^{-3}$ | 1.17/-0.68                       |

---

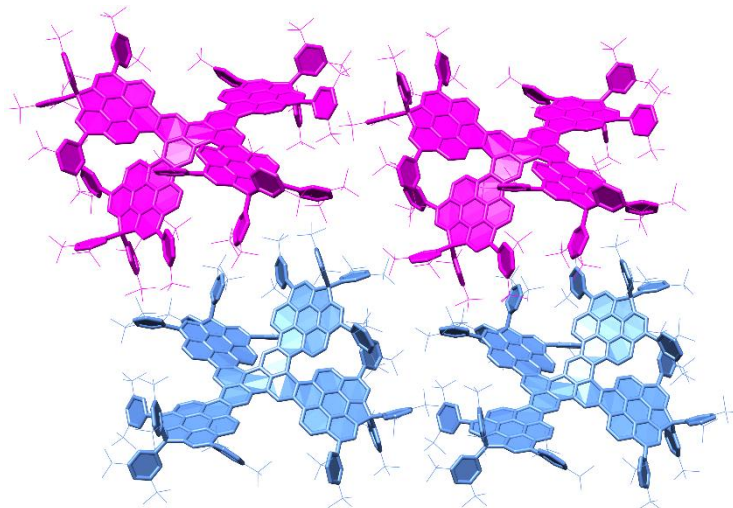

**Fig. S58.** 2D crystal-packing structure of **1b**.

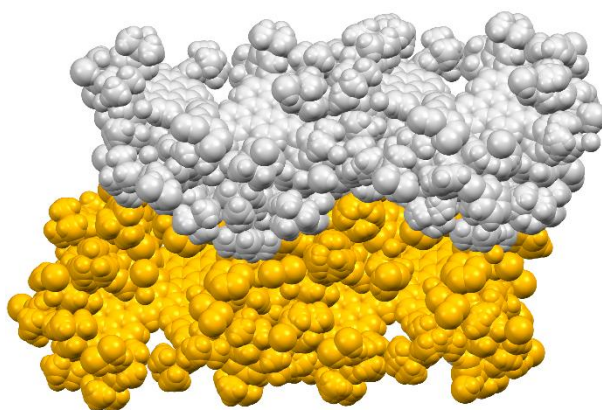

**Fig. S59.** 3D packing structure of **1b** with space-filling model.

**Table S11.** Crystal data and structure refinement for **1c**.

|                     |                                 |
|---------------------|---------------------------------|
| Identification code | CCDC2491990                     |
| Empirical formula   | $C_{335.5}H_{372.5}Cl_5N_{2.5}$ |
| Formula weight      | 4617.09                         |
| Temperature/K       | 100.00                          |
| Crystal system      | triclinic                       |
| Space group         | P-1                             |

|                                             |                                                                 |
|---------------------------------------------|-----------------------------------------------------------------|
| a/Å                                         | 19.5386(8)                                                      |
| b/Å                                         | 27.0718(13)                                                     |
| c/Å                                         | 31.4143(16)                                                     |
| $\alpha$ /°                                 | 67.712(3)                                                       |
| $\beta$ /°                                  | 75.728(3)                                                       |
| $\gamma$ /°                                 | 75.768(3)                                                       |
| Volume/Å <sup>3</sup>                       | 14683.9(13)                                                     |
| Z                                           | 2                                                               |
| $\rho_{\text{calc}}/\text{cm}^3$            | 1.044                                                           |
| $\mu/\text{mm}^{-1}$                        | 0.845                                                           |
| F(000)                                      | 4976.0                                                          |
| Crystal size/mm <sup>3</sup>                | 0.236 × 0.098 × 0.052                                           |
| Radiation                                   | CuK $\alpha$ ( $\lambda$ = 1.54178)                             |
| 2 $\Theta$ range for data collection/°      | 5.15 to 124.996                                                 |
| Index ranges                                | -22 ≤ h ≤ 22, -31 ≤ k ≤ 31, -34 ≤ l ≤ 34                        |
| Reflections collected                       | 235034                                                          |
| Independent reflections                     | 44305 [ $R_{\text{int}}$ = 0.2474, $R_{\text{sigma}}$ = 0.1773] |
| Data/restraints/parameters                  | 44305/3326/4000                                                 |
| Goodness-of-fit on F <sup>2</sup>           | 1.003                                                           |
| Final R indexes [ $I \geq 2\sigma(I)$ ]     | $R_1$ = 0.1234, $wR_2$ = 0.3090                                 |
| Final R indexes [all data]                  | $R_1$ = 0.3024, $wR_2$ = 0.4457                                 |
| Largest diff. peak/hole / e Å <sup>-3</sup> | 0.54/-0.43                                                      |

---

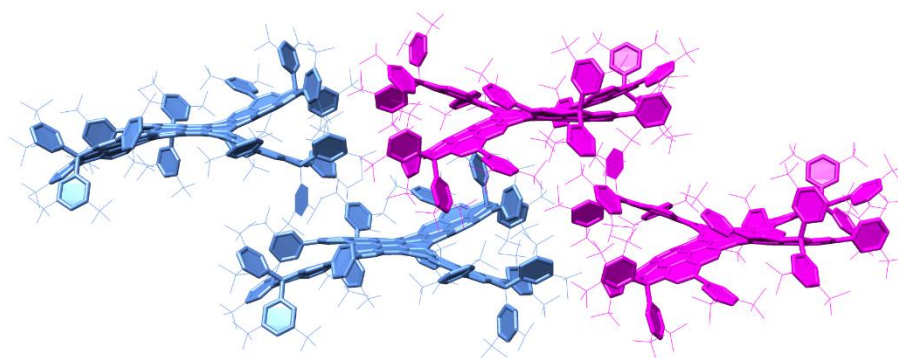

**Fig. S60.** 2D crystal-packing structure of **1c**.

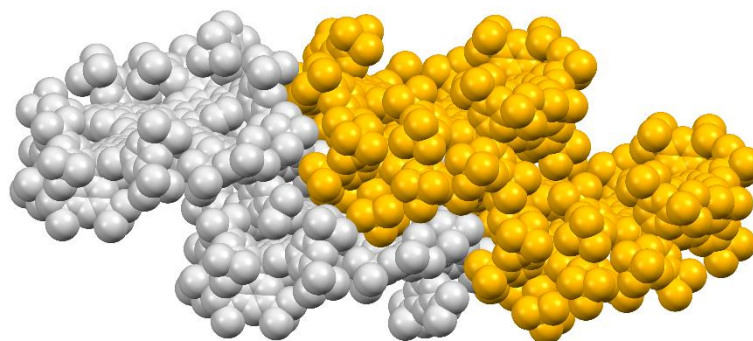

**Fig. S61.** 3D packing structure of **1c** with space-filling model.

## 6. References

- [1] (a) W. Zeng, Q. Qi, J. Wu, *Sci. Bull.* **2015**, *60*, 1266–1271. (b) T. Shen, Y. Zou, X. Hou, H. Wei, L. Ren, L. Jiao, J. Wu, *Angew. Chem. Int. Ed.* **2023**, *62*, e202311928.
- [2] J. M. Fisher, M. L. Williams, J. R. Palmer, N. E. Powers-Riggs, R. M. Young, M. R. Wasielewski, *J. Am. Chem. Soc.* **2024**, *146*, 9911–9919.
- [3] *Gaussian 09; Revision A.2*; M. J. Frisch, G. W. Trucks, H. B. Schlegel, G. E. Scuseria, M. A. Robb, J. R. Cheeseman, G. Scalmani, V. Barone, B. Mennucci, G. A. Petersson, H. Nakatsuji, M. Caricato, X. Li, H. P. Hratchian, A. F. Izmaylov, J. Bloino, G. Zheng, J. L. Sonnenberg, M. Hada, M. Ehara, K. Toyota, R. Fukuda, J. Hasegawa, M. Ishida, T. Nakajima, Y. Honda, O. Kitao, H. Nakai, T. Vreven, J. J. A. Montgomery, J. E. Peralta, F. Ogliaro, M. Bearpark, J. J. Heyd, E. Brothers, K. N. Kudin, V. N. Staroverov, R. Kobayashi, J. Normand, K. Raghavachari, A. Rendell, J. C. Burant, S. S. Iyengar, J. Tomasi, M. Cossi, N. Rega, N. J. Millam, M. Klene, J. E. Knox, J. B. Cross, V. Bakken, C. Adamo, J. Jaramillo, R. Gomperts, R. E. Stratmann, O. Yazyev, A. J. Austin, R. Cammi, C. Pomelli, J. W. Ochterski, R. L. Martin, K. Morokuma, V. G. Zakrzewski, G. A. Voth, P. Salvador, J. J. Dannenberg, S. Dapprich, A. D. Daniels, Ö. Farkas, J. B. Foresman, J. V. Ortiz, J. Cioslowski, D. J. Fox, Gaussian, Inc., Wallingford CT, **2009**.
- [4] (a) A. D. Becke, *J. Chem. Phys.* **1993**, *98*, 5648. (b) C. Lee, W. Yang, R. G. Parr, *Phys. Rev. B: Condens. Matter* **1988**, *37*, 785. (c) R. Ditchfield, W. J. Hehre, J. A. Pople, *J. Chem. Phys.* **1971**, *54*, 724. (d) W. J. Hehre, R. Ditchfield, J. A. Pople, *J. Chem. Phys.* **1972**, *56*, 2257. (e) P. C. Hariharan, J. A. Pople, *Theor. Chim. Acta* **1973**, *28*, 213.
- [5] M. Caricato, A. Frisch, J. Hiscocks, M. J. Frisch. Gaussian 09, Revision d. 01, Gaussian, Inc, Wallingford CT, **2009**, 201.
- [6] T. Yanai, D. Tew, N. Handy, *Chem. Phys. Lett.* **2004**, *393*, 51.
- [7] E. F. Pettersen, T. D. Goddard, C. C. Huang, G. S. Couch, D. M. Greenblatt, E. C. Meng, T. E. Ferrin, *J. Comput. Chem.* **2004**, *25*, 1605.

- [8] SADABS. Ver. 2014/5. L. Krause, R. Herbs-Irmer, G. M. Sheldrick, D. Stalke, *J. Appl. Crystallogr.* **2015**, 48.
- [9] G. M. Sheldrick, *Sect. A, Acta Crystallogr.* **2015**, A71, 3.
- [10] G. M. Sheldrick, Ver. 2014/7. *Acta Crystallographica. Sect C Structural Chemistry* 71, 3.
- [11] L. J. Farrugia, *J. Appl. Cryst.* **1999**, 32, 837.

## 7. Appendix I: NMR and HR-mass spectra of all new compounds

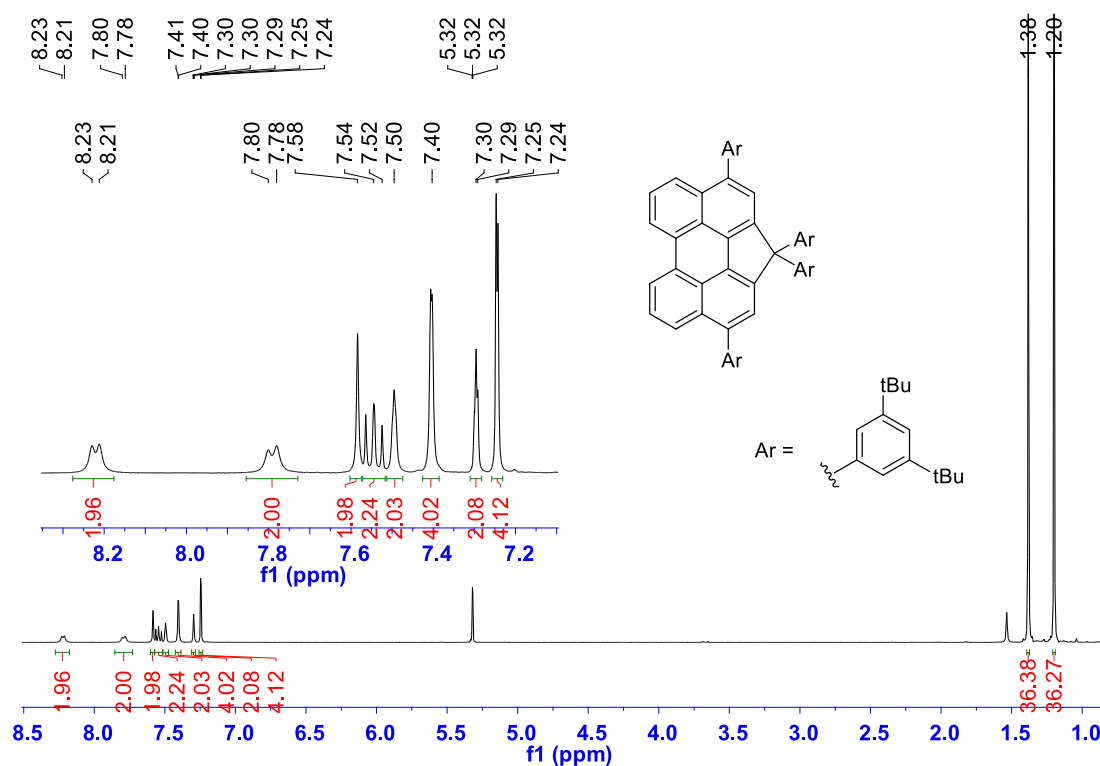

Fig. S62. <sup>1</sup>H NMR spectrum of **3** (400 MHz, CD<sub>2</sub>Cl<sub>2</sub>, 298 K).

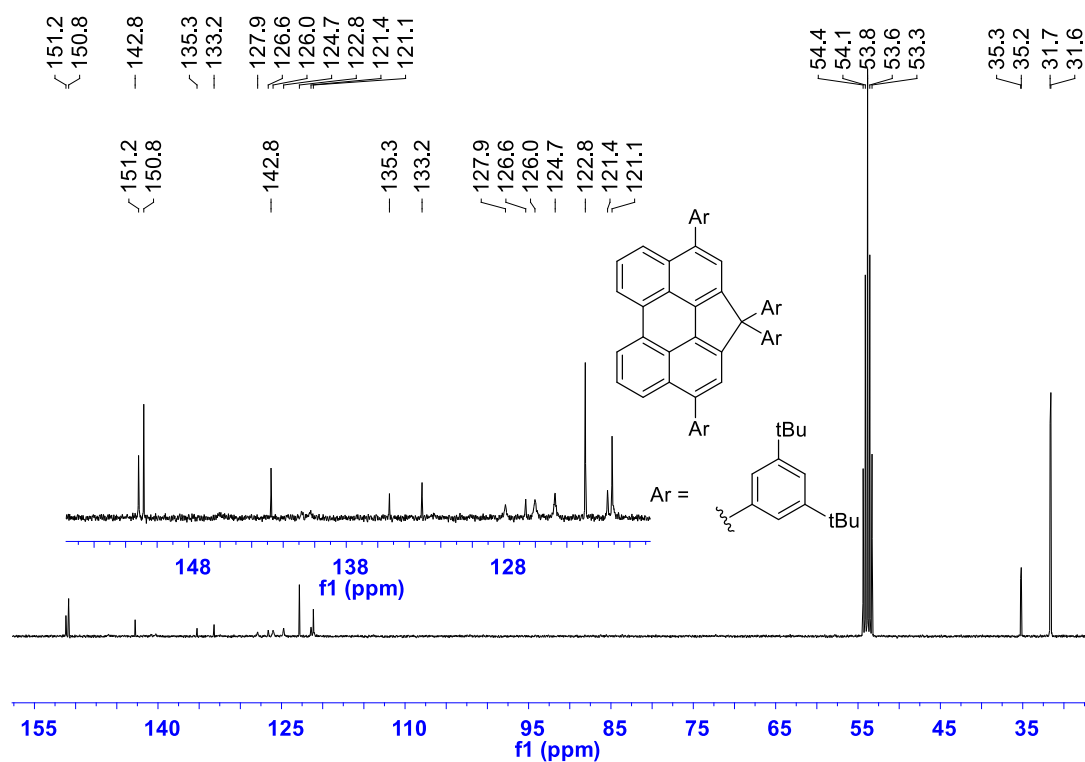

Fig. S63. <sup>13</sup>C NMR spectrum of **3** (100 MHz, CD<sub>2</sub>Cl<sub>2</sub>, 298 K).

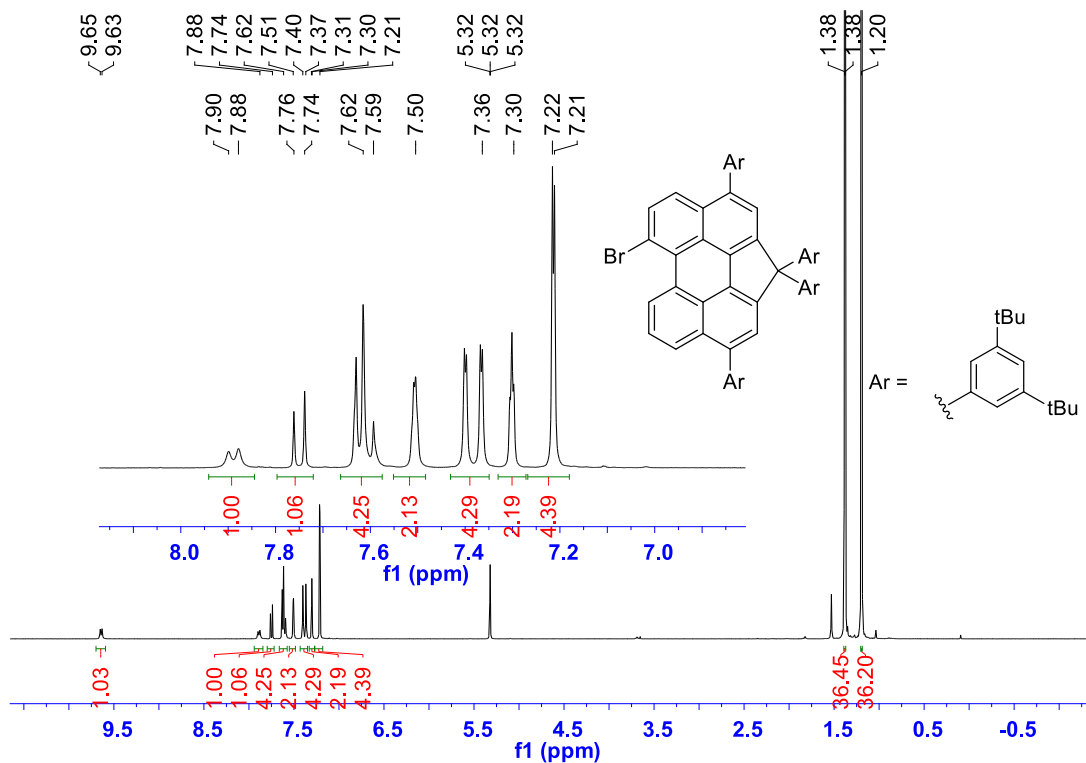

Fig. S64. <sup>1</sup>H NMR spectrum of 4 (400 MHz, CD<sub>2</sub>Cl<sub>2</sub>, 298 K).

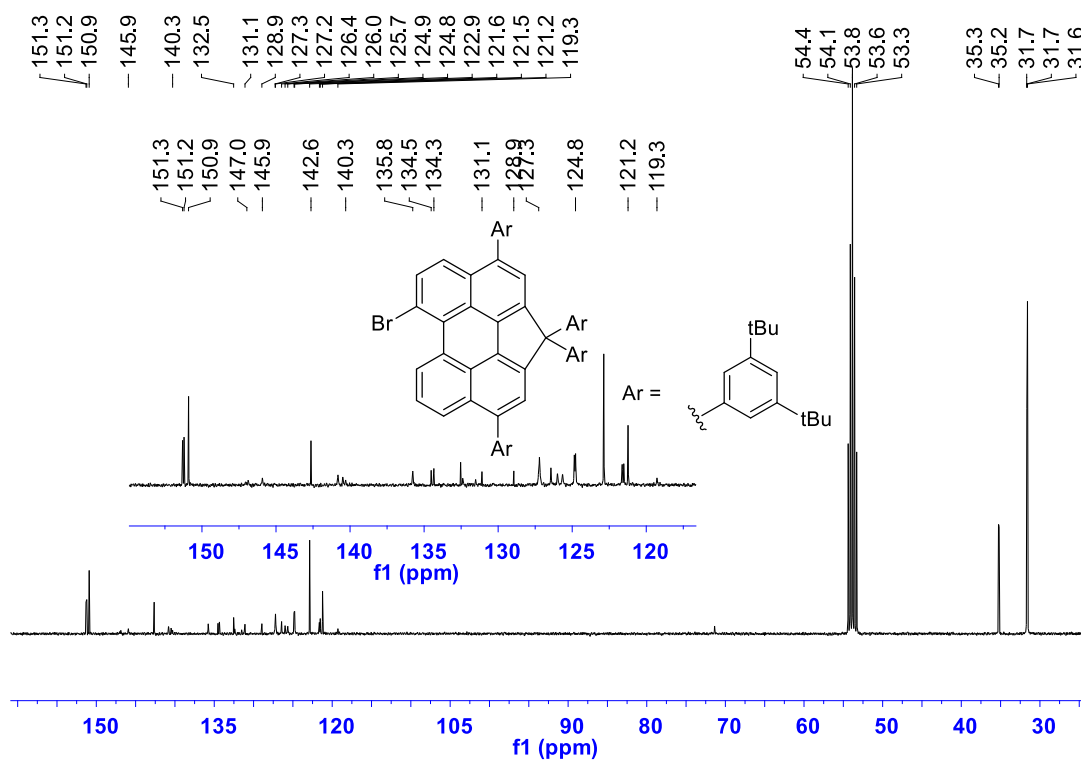

Fig. S65. <sup>13</sup>C NMR spectrum of 4 (100 MHz, CD<sub>2</sub>Cl<sub>2</sub>, 298 K).

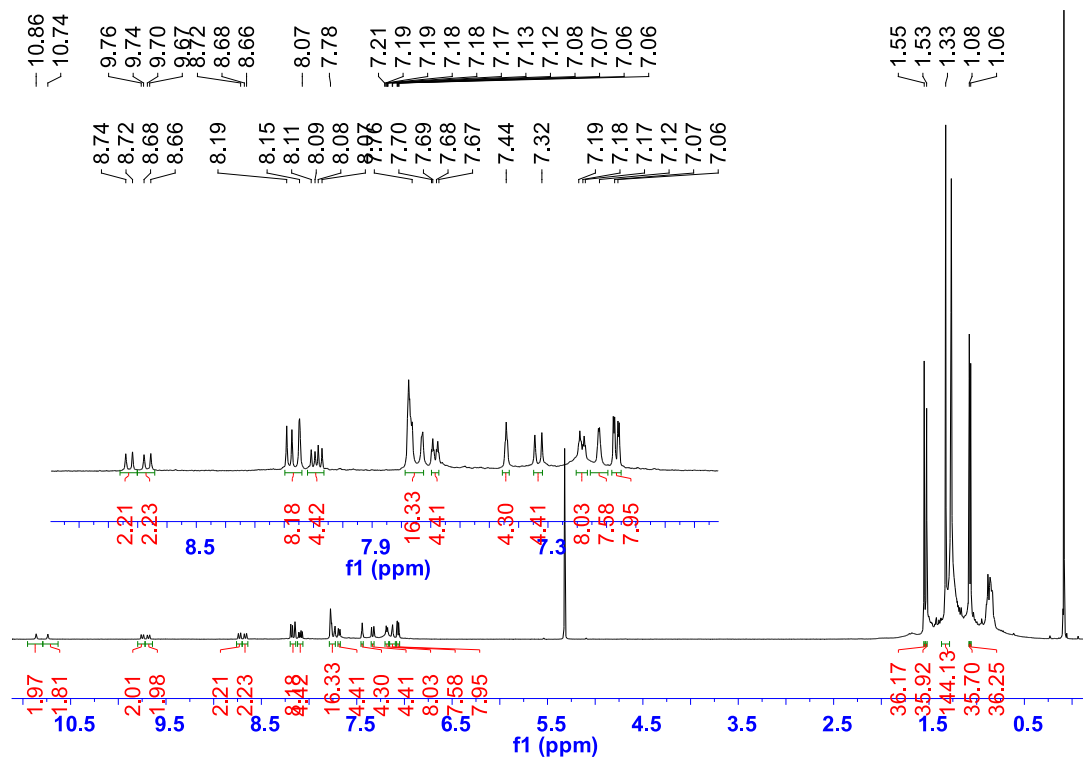

Fig. S66.  $^1\text{H}$  NMR spectrum of **1a** (400 MHz,  $\text{CD}_2\text{Cl}_2$ , 298 K).

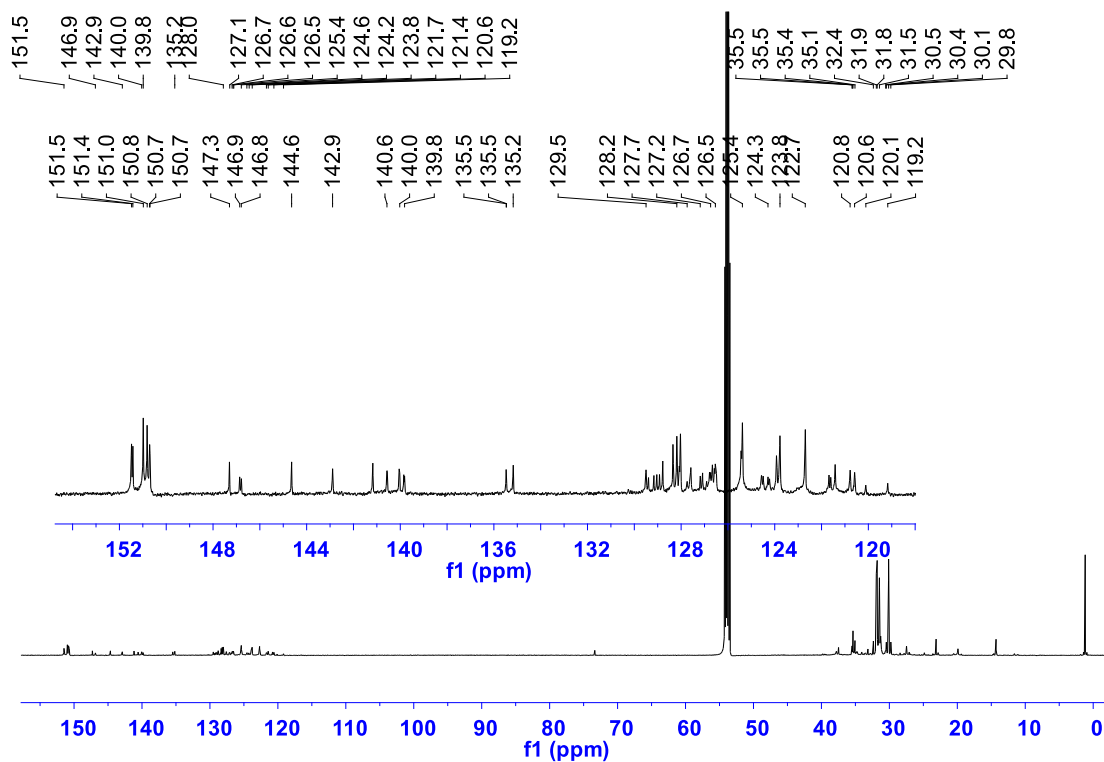

Fig. S67.  $^{13}\text{C}$  NMR spectrum of **1a** (150 MHz,  $\text{CD}_2\text{Cl}_2$ , 298 K).

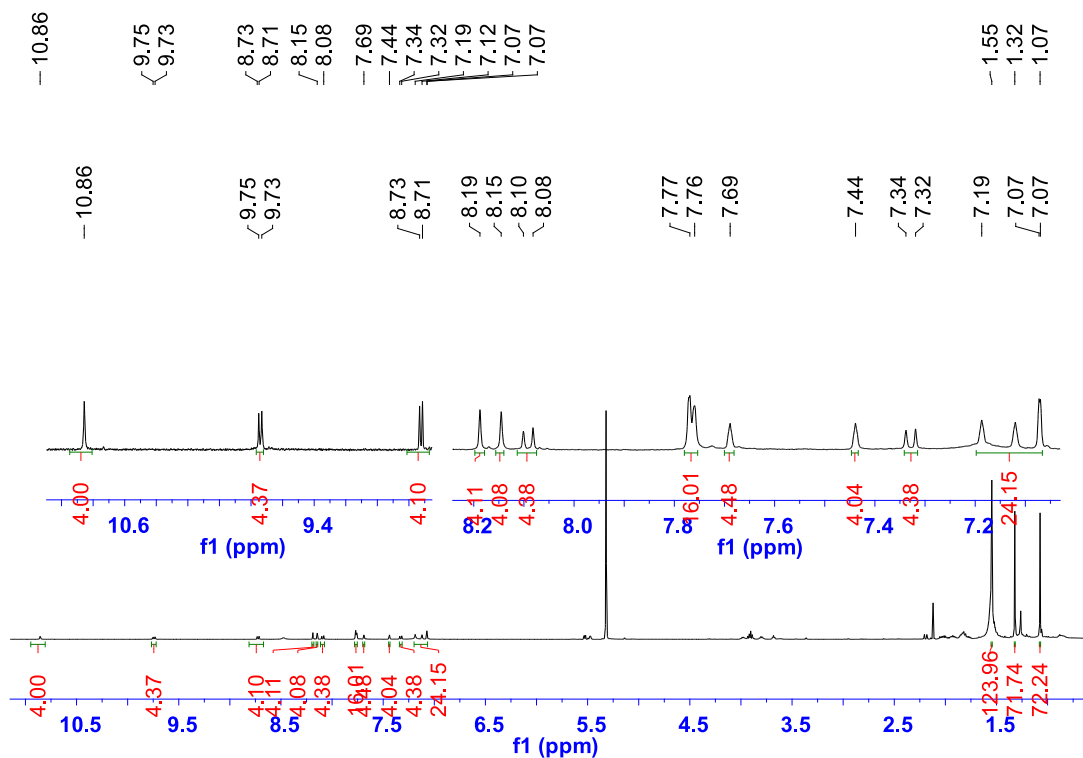

Fig. S68.  $^1\text{H}$  NMR spectrum of **1a-rac** (500 MHz,  $\text{CD}_2\text{Cl}_2$ , 298 K).

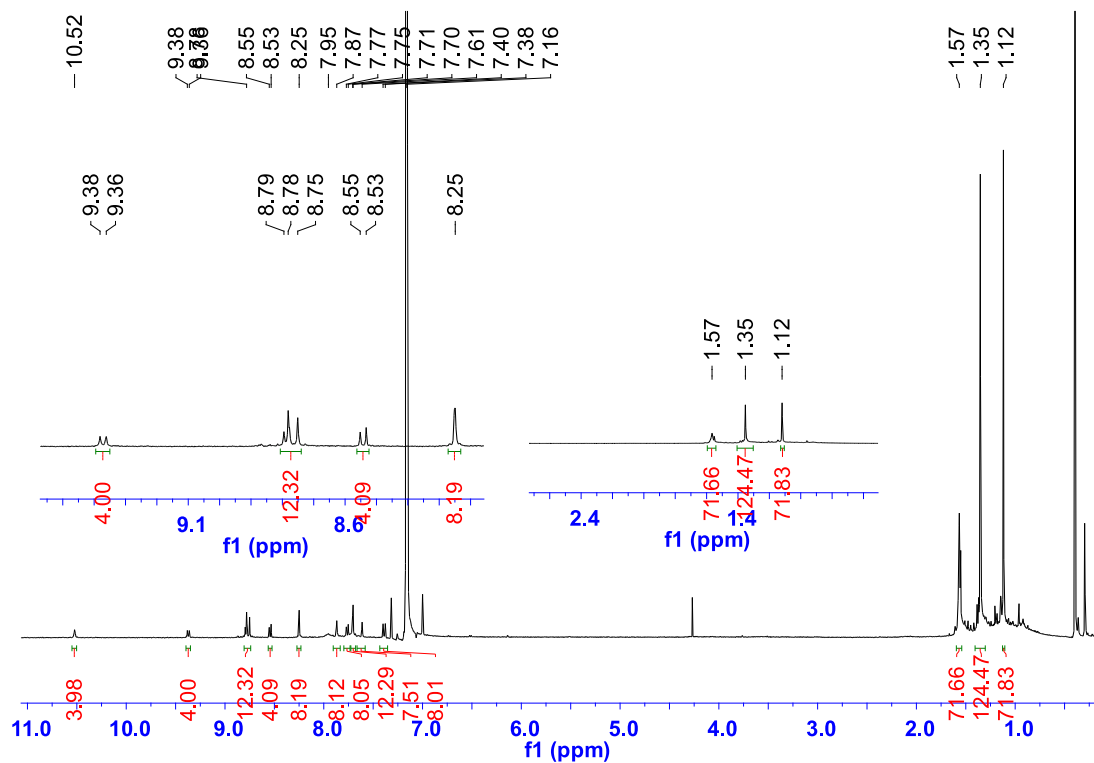

Fig. S69.  $^1\text{H}$  NMR spectrum of **1a-rac** (500 MHz,  $\text{C}_6\text{D}_6$ , 298 K).

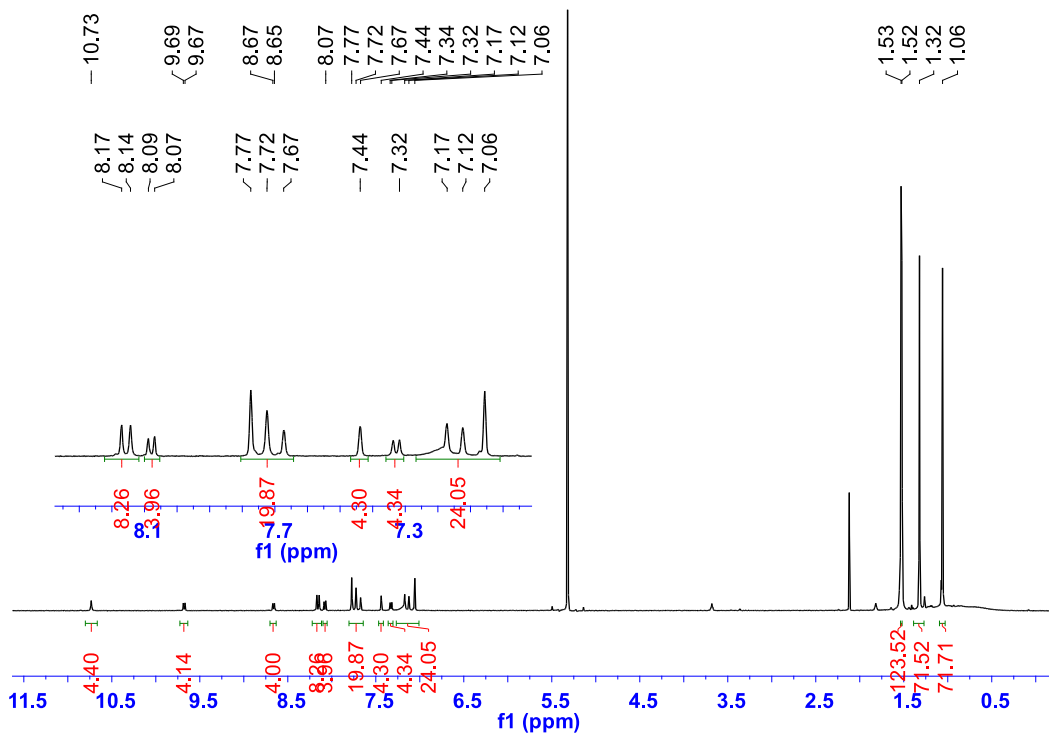

Fig. S70.  $^1\text{H}$  NMR spectrum of **1a-meso** (500 MHz,  $\text{CD}_2\text{Cl}_2$ , 298 K).

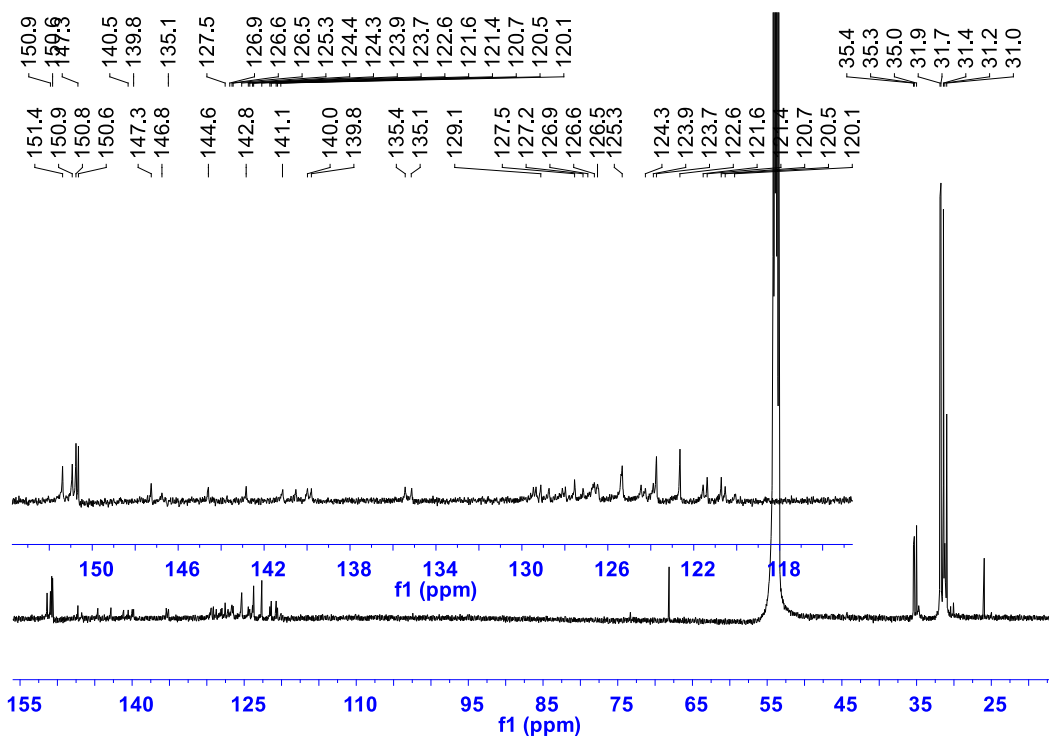

Fig. S71.  $^{13}\text{C}$  NMR spectrum of **1a-meso** (150 MHz,  $\text{CD}_2\text{Cl}_2$ , 298 K).

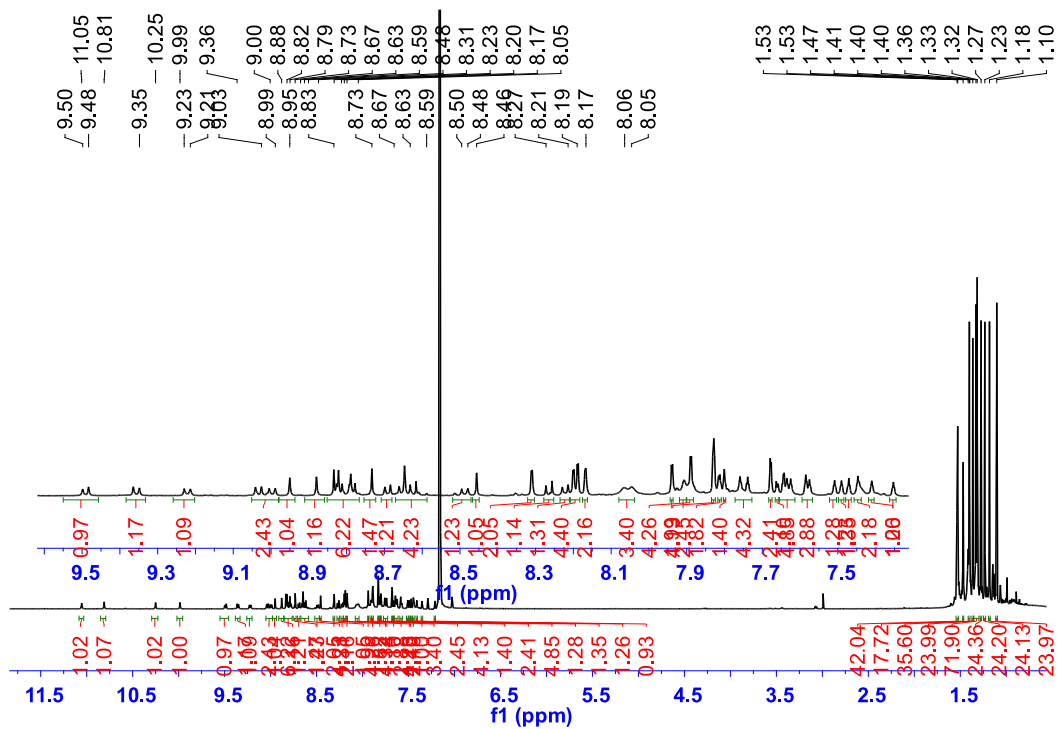

Fig. S72.  $^1\text{H}$  NMR spectrum of **1b** (600 MHz,  $\text{C}_6\text{D}_6$ , 298 K).

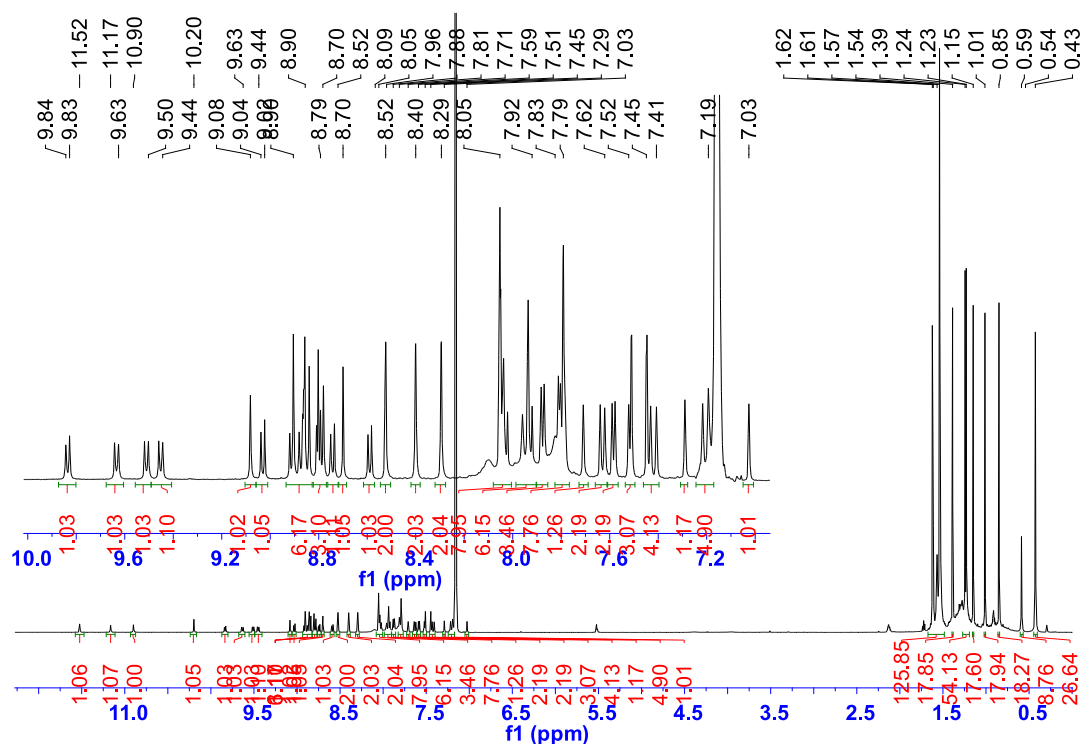

Fig. S73.  $^1\text{H}$  NMR spectrum of **1c** (600 MHz,  $\text{C}_6\text{D}_6$ , 298 K).

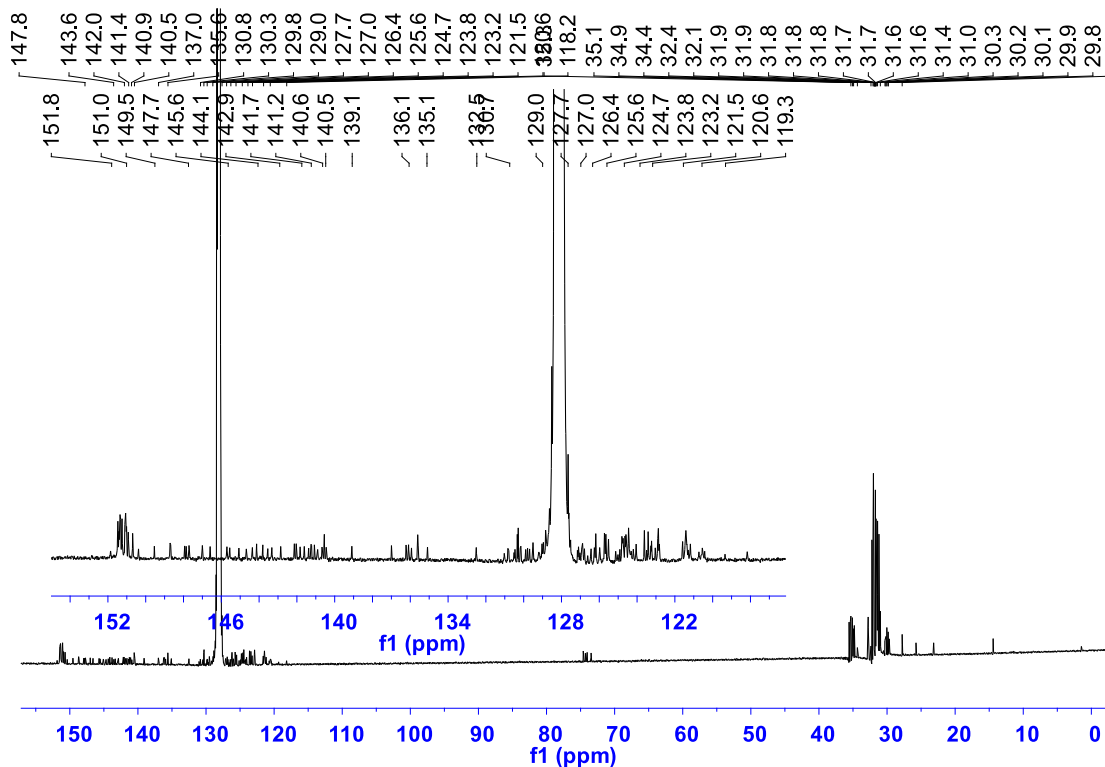

Fig. S74.  $^{13}\text{C}$  NMR spectrum of **1c** (150 MHz,  $\text{C}_6\text{D}_6$ , 298 K).

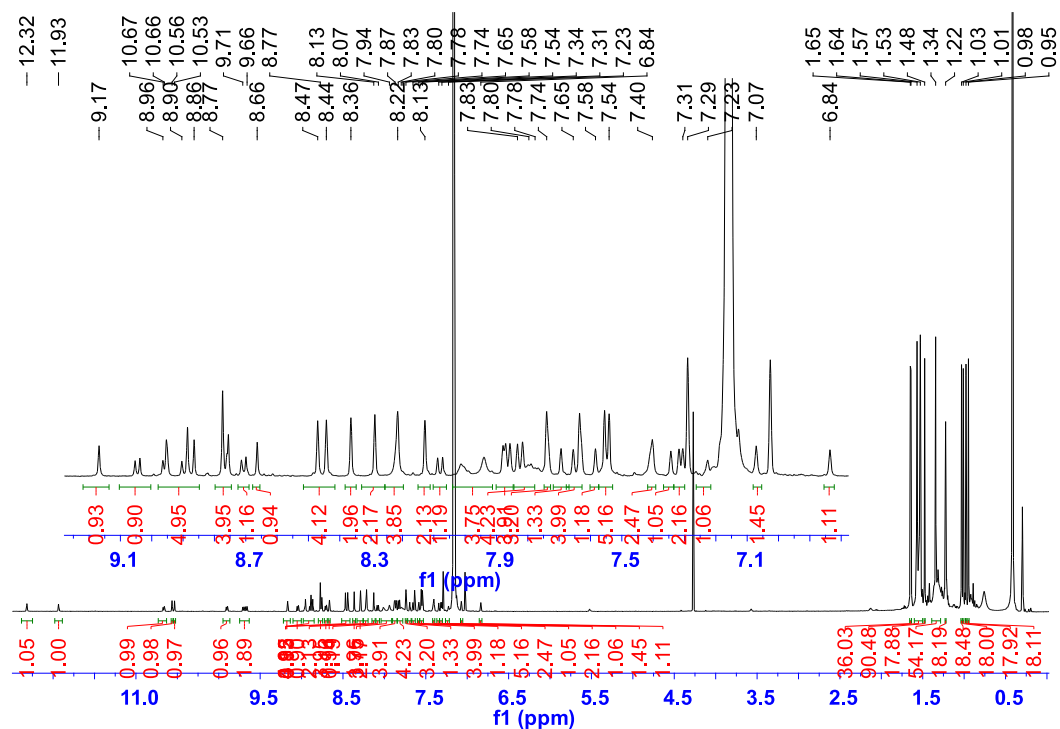

Fig. S75.  $^1\text{H}$  NMR spectrum of **1d** (600 MHz,  $\text{C}_6\text{D}_6$ , 298 K).

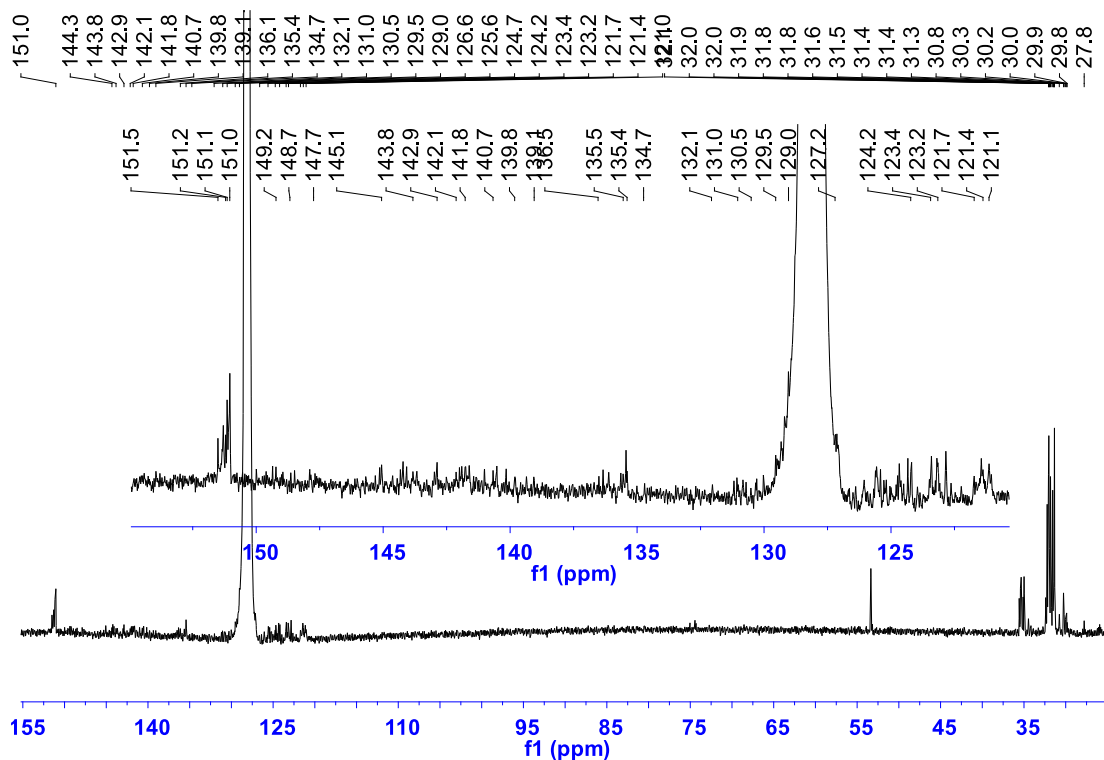

**Fig. S76.**  $^{13}\text{C}$  NMR spectrum of **1d** (150 MHz,  $\text{C}_6\text{D}_6$ , 298 K). The low S/N ratio was due to the low concentration and existence of many  $sp^2$ -carbons.

### Mass Spectrum SmartFormula Report

|                        |                        |                               |                                                                  |
|------------------------|------------------------|-------------------------------|------------------------------------------------------------------|
| <b>Sample Name</b>     | zqf-per                | <b>Data File</b>              | D:\MassHunter\Data\Chemistry\2025\202503\20250320-apci\zqf-per.d |
| <b>Instrument Name</b> | Agilent 6546 LC-QTOF   | <b>IRM Calibration Status</b> | Success                                                          |
| <b>Acq Method</b>      | MS Scan_union_APCI-3.m | <b>Acquired Time</b>          | 20/3/2025 11:42:43 AM (UTC+08:00)                                |
| <b>Comment</b>         | Prof Wu Jishan         | <b>Operator</b>               | WLK                                                              |

| Meas. m/z | # | Formula                      | Calc. Mass | Err [ppm] |
|-----------|---|------------------------------|------------|-----------|
| 1017.7278 | 1 | $\text{C}_{77}\text{H}_{93}$ | 1017.7272  | 0.59      |

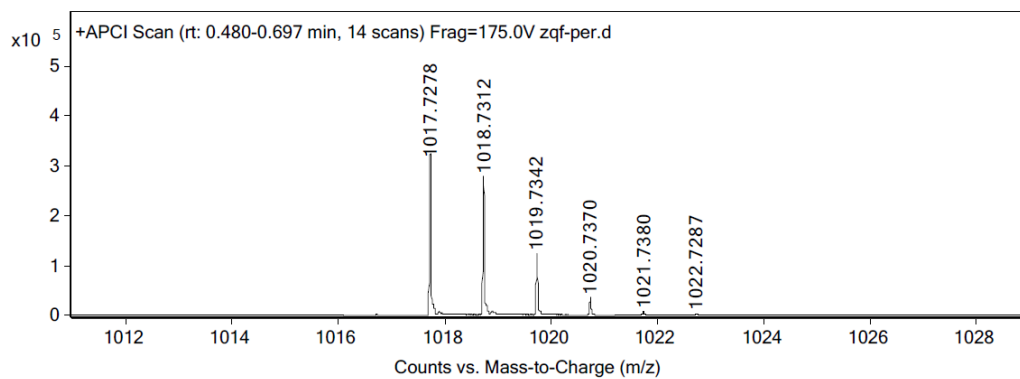

**Fig. S77.** HR mass spectrum (APCI) of compound **3**.

## Mass Spectrum SmartFormula Report

|                        |                        |                               |                                                                     |
|------------------------|------------------------|-------------------------------|---------------------------------------------------------------------|
| <b>Sample Name</b>     | zqf-per-Br             | <b>Data File</b>              | D:\MassHunter\Data\Chemistry\2025\202503\20250320-apci\zqf-per-Br.d |
| <b>Instrument Name</b> | Agilent 6546 LC-QTOF   | <b>IRM Calibration Status</b> | Success                                                             |
| <b>Acq Method</b>      | MS Scan_union_APCI-3.m | <b>Acquired Time</b>          | 20/3/2025 11:56:03 AM (UTC+08:00)                                   |
| <b>Comment</b>         | Prof Wu Jishan         | <b>Operator</b>               | WLK                                                                 |

| Meas. m/z | # | Formula    | Calc. Mass | Err [ppm] |
|-----------|---|------------|------------|-----------|
| 1095.6374 | 1 | C77 H92 Br | 1095.6377  | 0.27      |

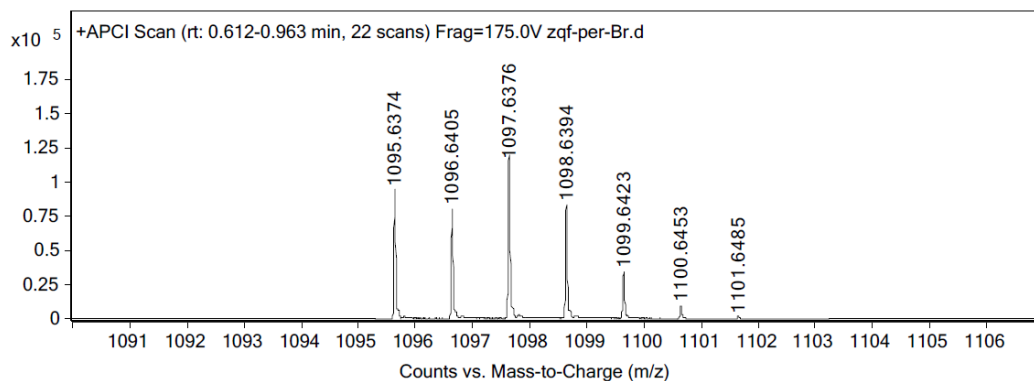

Page 1 of 1

Printed at 12:03 PM on 20-Mar-2025

**Fig. S78.** HR mass spectrum (APCI) of compound 4.

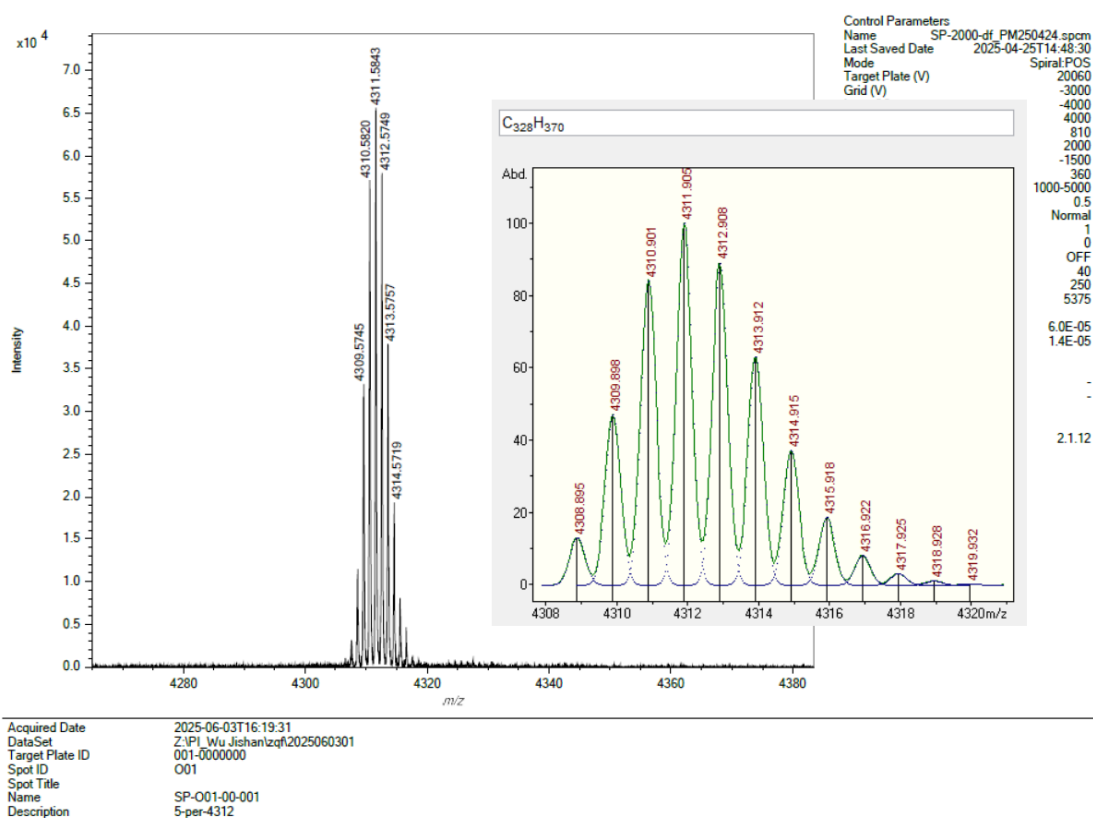

**Fig. S79.** HR mass spectrum (MALDI) of compound 6.

## Mass Spectrum Report

| Sample Name | Compound 7       | Instrument Name | JEOL JMS-S3000 Sprial-TOF |
|-------------|------------------|-----------------|---------------------------|
| Meas. $m/z$ | Formula          | Calc. Mass      | Err [ppm]                 |
| 4306.8715   | $C_{328}H_{368}$ | 4306.8791       | -1.76                     |

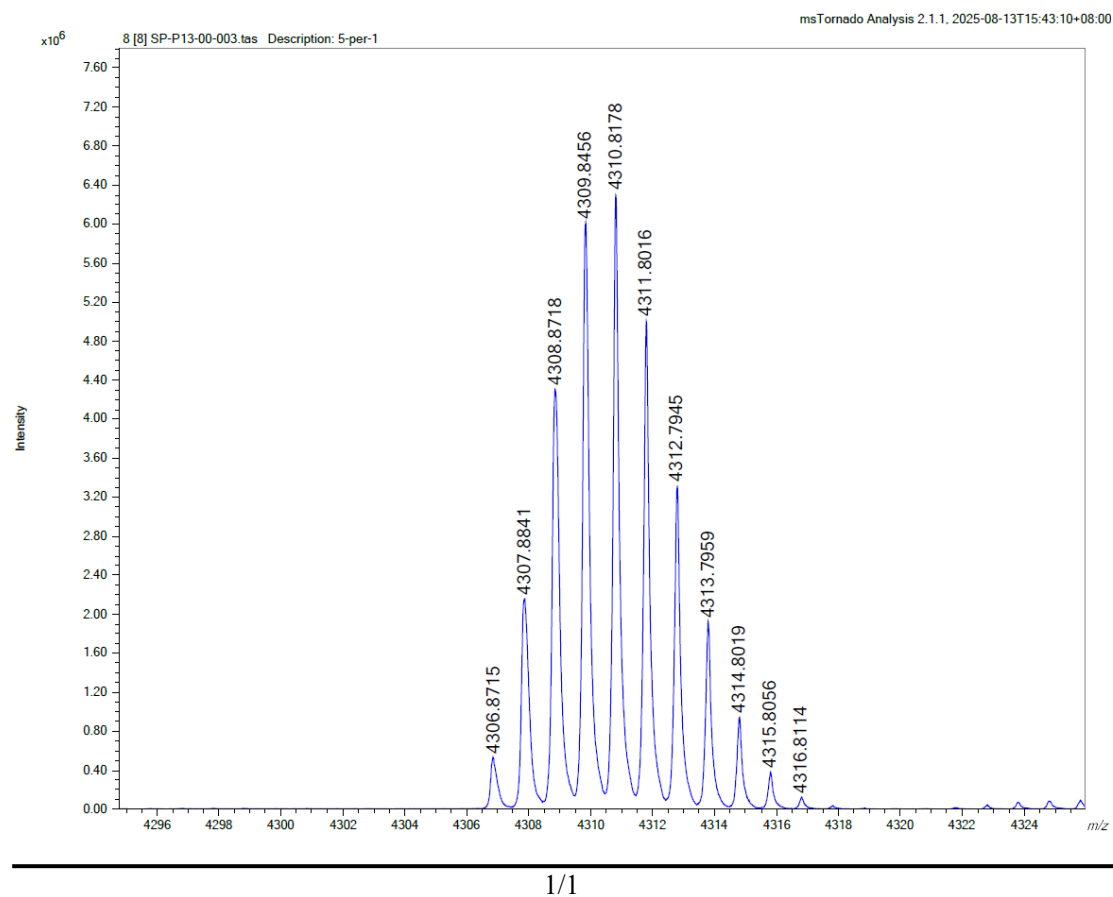

**Fig. S80.** HR mass spectrum (MALDI) of compound 7.

# Mass Spectrum Report

| Sample Name | Compound 1a      | Instrument Name | JEOL JMS-S3000 Sprial-TOF |
|-------------|------------------|-----------------|---------------------------|
| Meas. $m/z$ | Formula          | Calc. Mass      | Err [ppm]                 |
| 4302.8394   | $C_{328}H_{364}$ | 4302.8478       | -1.95                     |

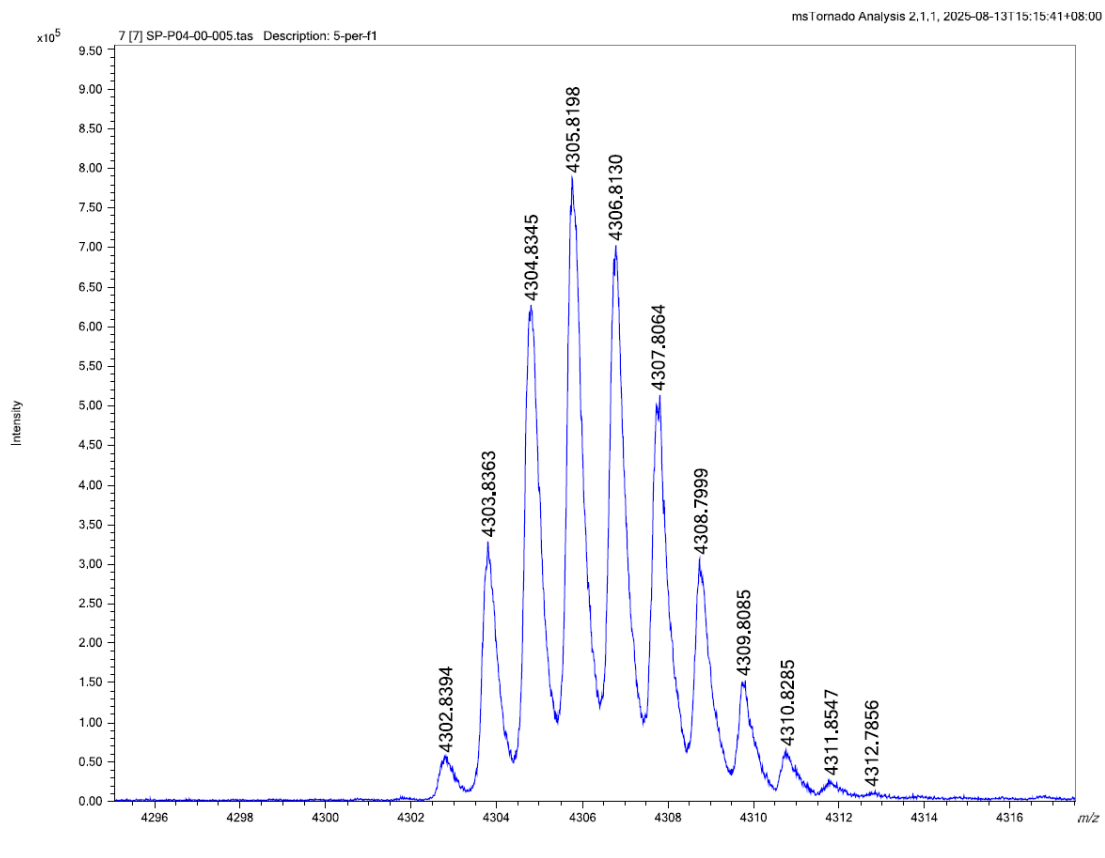

1/1

**Fig. S81.** HR mass spectrum (MALDI) of compound **1a**.

## Mass Spectrum Report

Sample Name Compound **1a-rac** Instrument Name JEOL JMS-S3000 Sprial-TOF

Meas.  $m/z$  Formula Calc. Mass Err [ppm]  
4302.8376  $C_{328}H_{364}$  4302.8478 -2.37

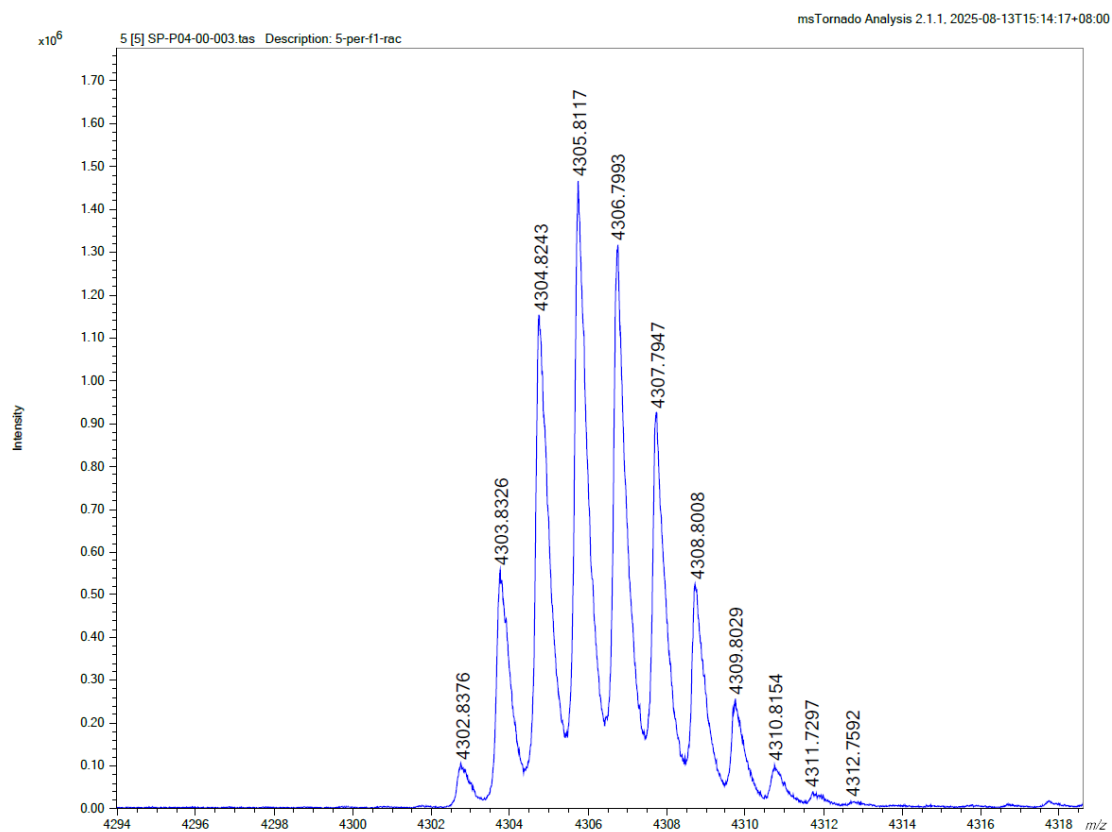

1/1

**Fig. S82.** HR mass spectrum (MALDI) of compound **1a-rac**.

## Mass Spectrum Report

Sample Name Compound **1a-meso** Instrument Name JEOL JMS-S3000 Sprial-TOF

Meas.  $m/z$  Formula Calc. Mass Err [ppm]  
4302.8255  $C_{328}H_{364}$  4302.8478 -5.18

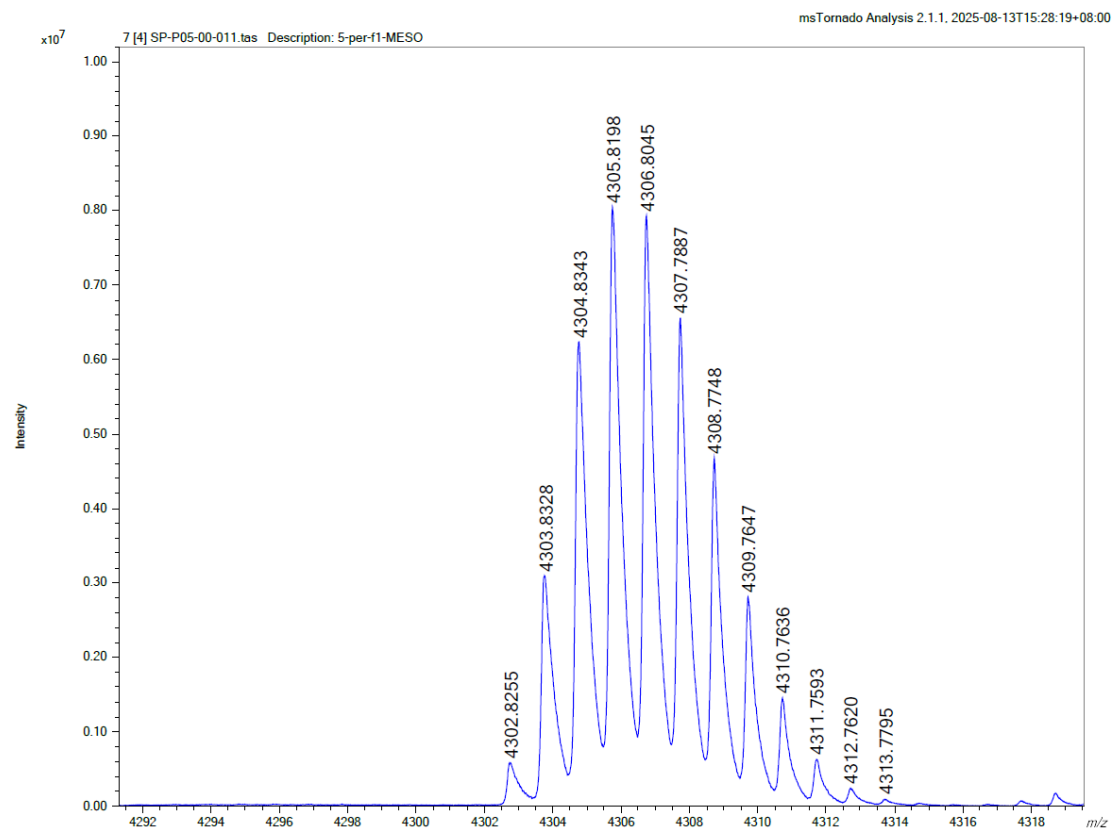

1/1

**Fig. S83.** HR mass spectrum (MALDI) of compound **1a-meso**.

## Mass Spectrum Report

Sample Name Compound **1b** Instrument Name JEOL JMS-S3000 Sprial-TOF

| Meas. $m/z$ | Formula          | Calc. Mass | Err [ppm] |
|-------------|------------------|------------|-----------|
| 4302.8296   | $C_{328}H_{364}$ | 4302.8478  | -4.23     |

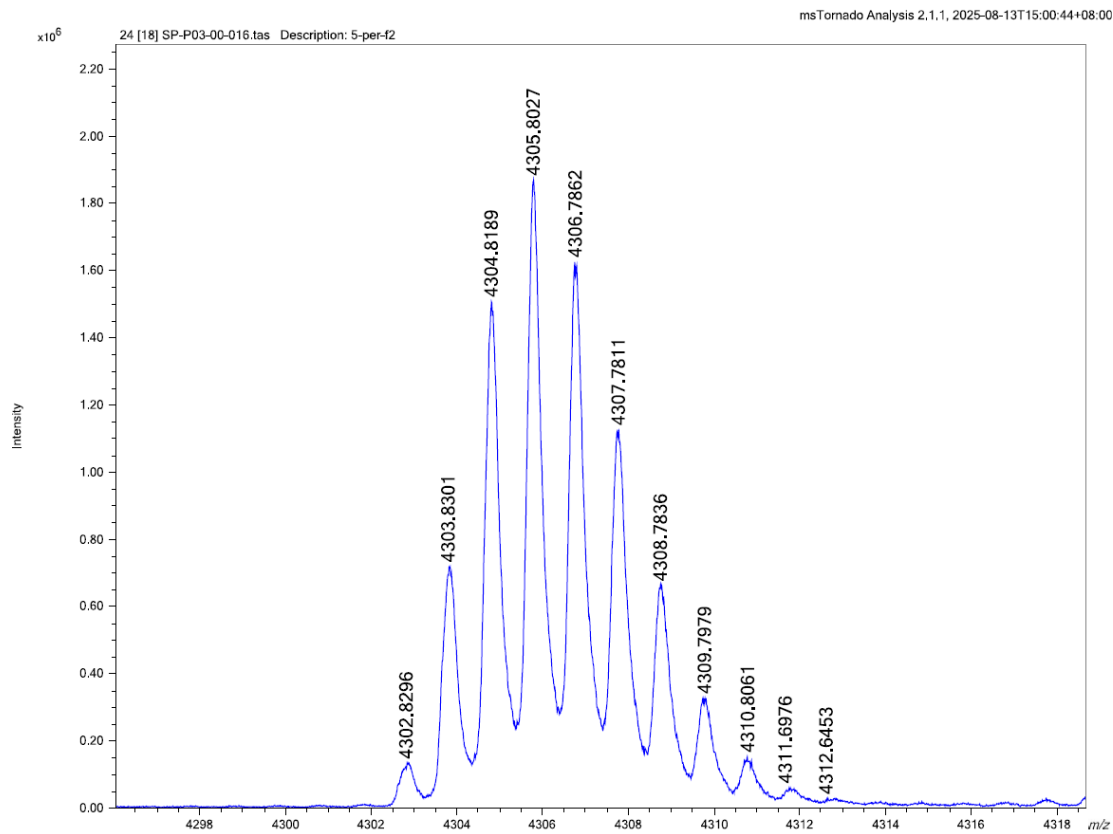

1/1

**Fig. S84.** HR mass spectrum (MALDI) of compound **1b**.

## Mass Spectrum Report

| Sample Name | Compound 1c      | Instrument Name | JEOL JMS-S3000 Sprial-TOF |
|-------------|------------------|-----------------|---------------------------|
| Meas. $m/z$ | Formula          | Calc. Mass      | Err [ppm]                 |
| 4298.8234   | $C_{328}H_{360}$ | 4298.8165       | 1.61                      |

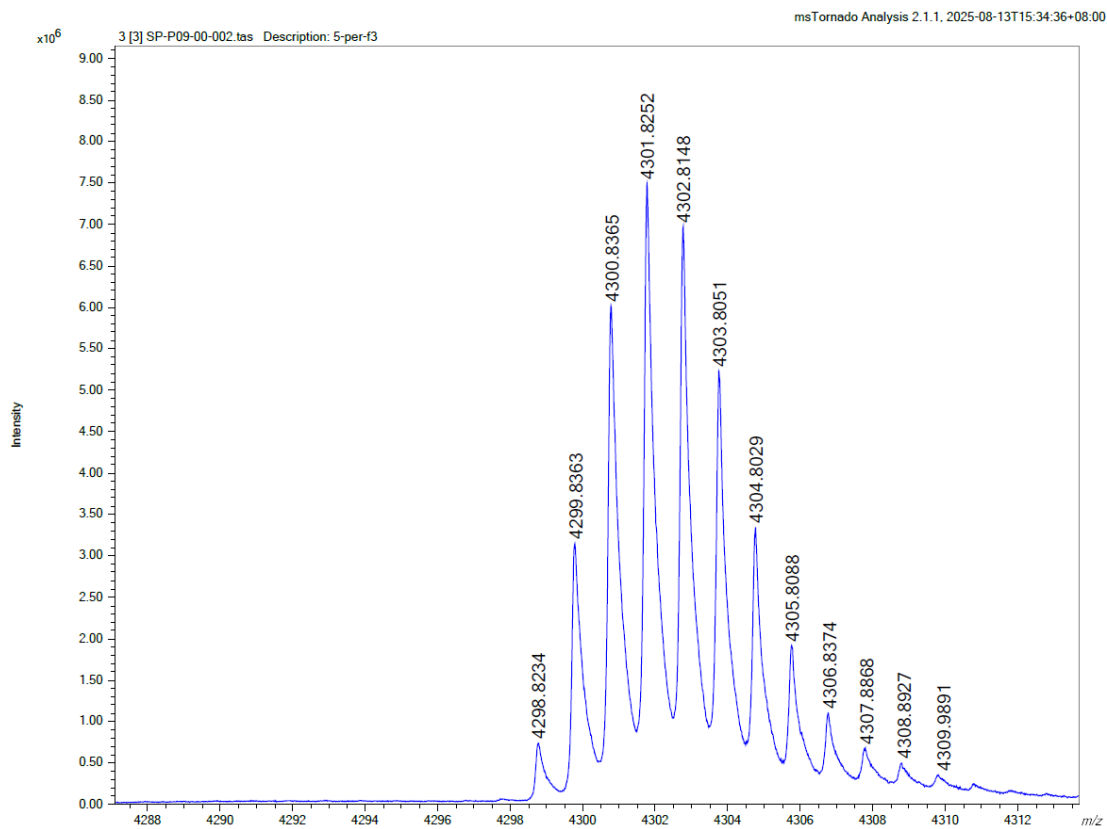

1/1

**Fig. S85.** HR mass spectrum (MALDI) of compound **1c**.

# Mass Spectrum Report

| Sample Name | Compound 1d      | Instrument Name | JEOL JMS-S3000 Sprial-TOF |
|-------------|------------------|-----------------|---------------------------|
| Meas. $m/z$ | Formula          | Calc. Mass      | Err [ppm]                 |
| 4296.8653   | $C_{328}H_{358}$ | 4296.8008       | 15.01                     |

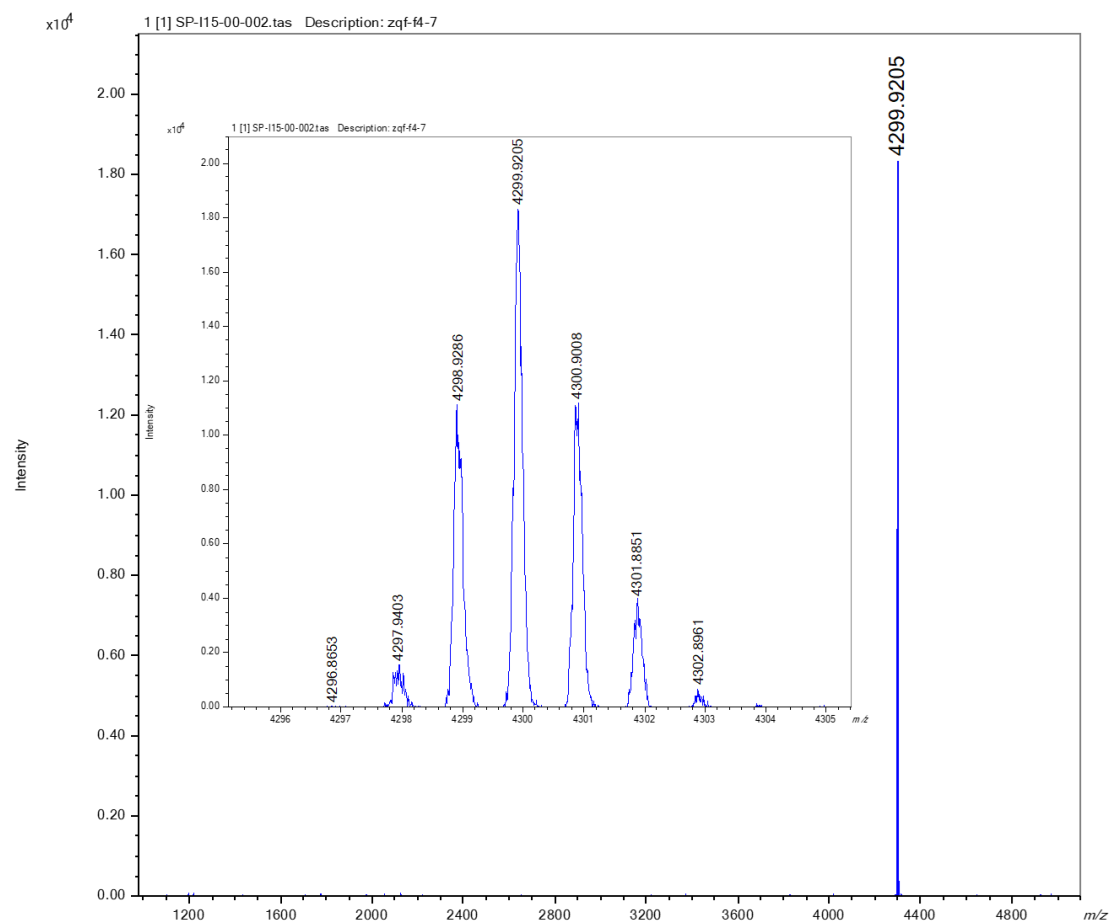

1/1

Fig. S86. HR mass spectrum (MALDI) of compound 1d.

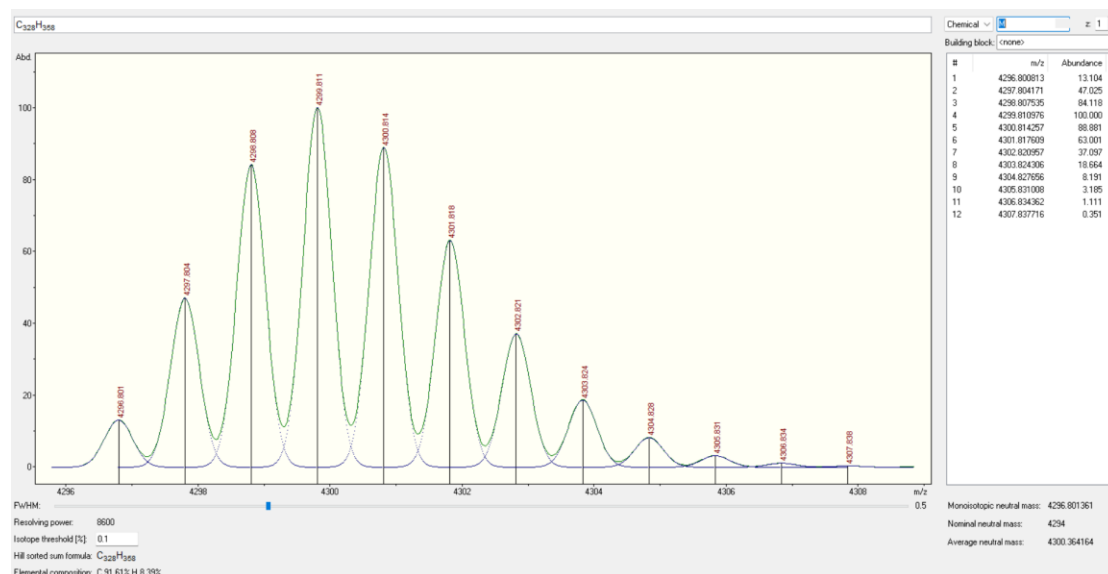

**Fig. S87.** Simulated mass spectrum of compound **1d**.

### Multiple Mass Spectral Measurements of Compound **1d**:

1<sup>st</sup>:

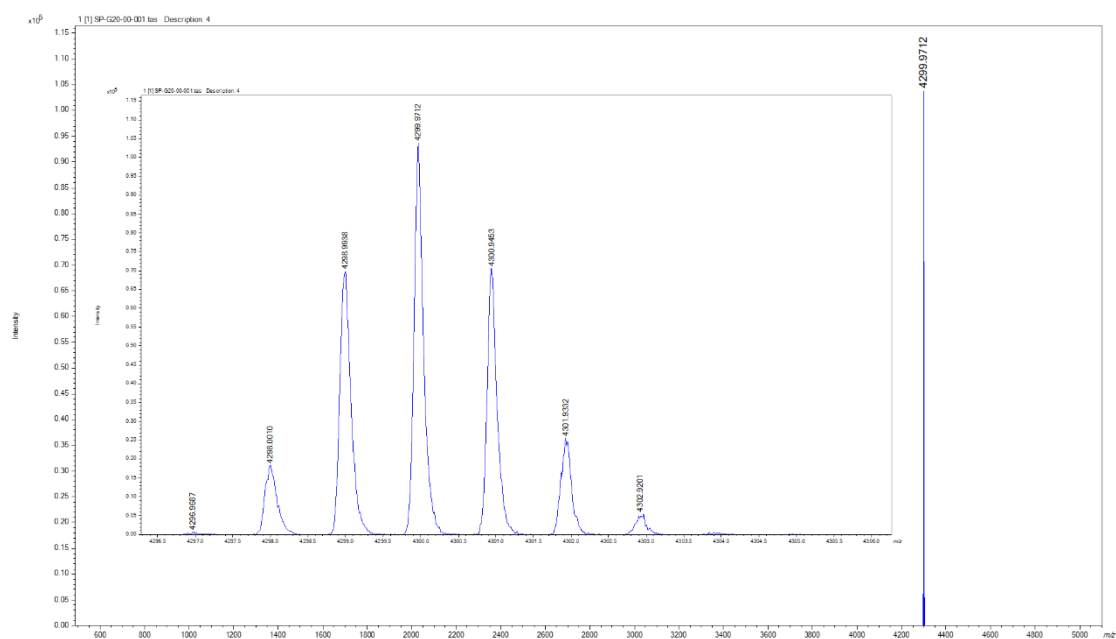

**Fig. S88.** Further measurements of the mass spectrum of compound **1d** (first measurement)

2<sup>nd</sup>.

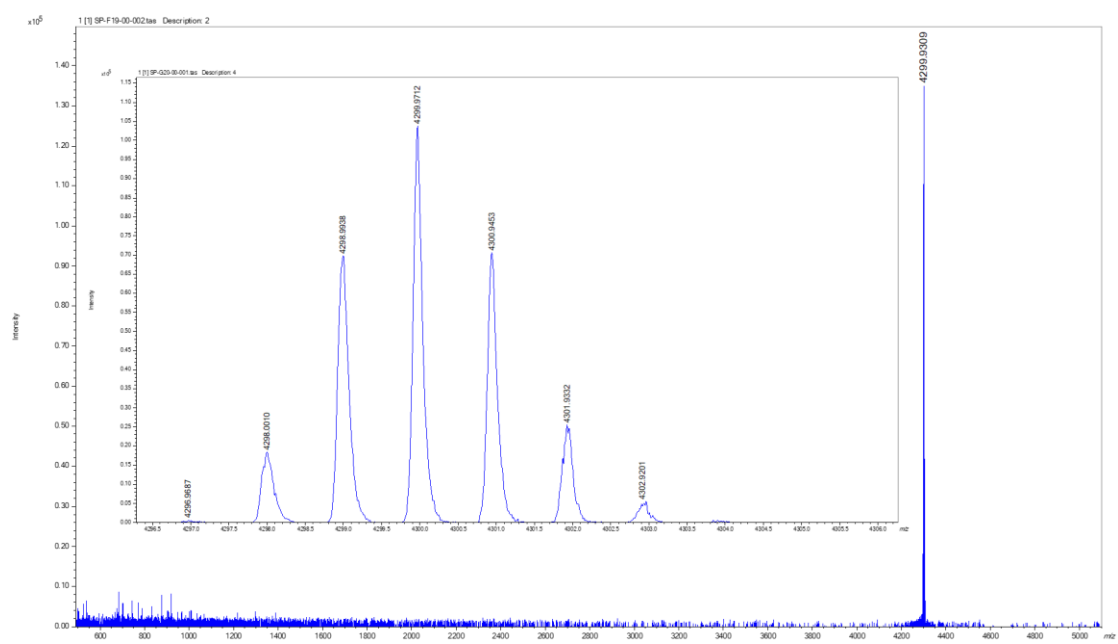

**Fig. S89.** Further measurements of the mass spectrum of compound **1d** (second measurement)

3<sup>rd</sup>.

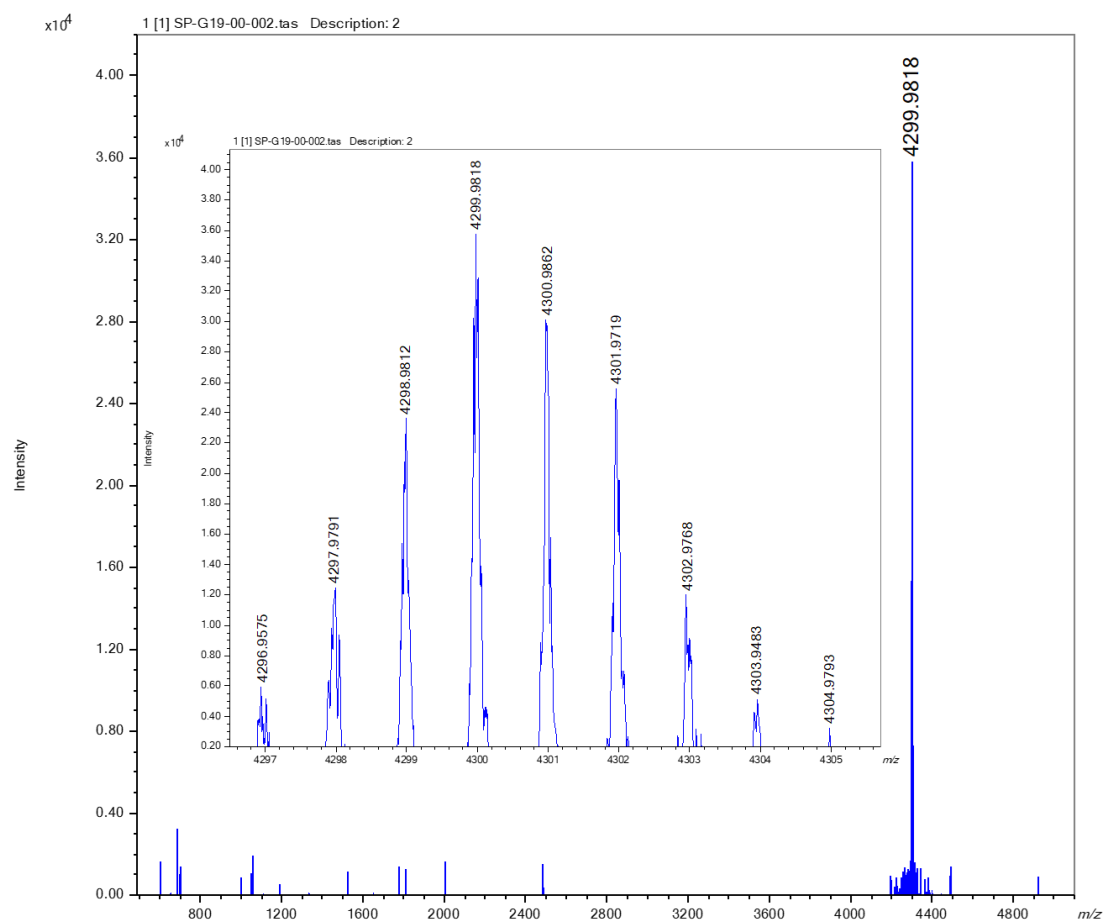

**Fig. S90.** Further measurements of the mass spectrum of compound **1d** (third measurement)

4<sup>th</sup>:

### Mass Spectrum Report

| Sample Name | Compound 1d                       | Instrument Name | JEOL JMS-S3000 Sprial-TOF |
|-------------|-----------------------------------|-----------------|---------------------------|
| Meas. $m/z$ | Formula                           | Calc. Mass      | Err [ppm]                 |
| 4296.8747   | C <sub>328</sub> H <sub>358</sub> | 4296.8008       | 17.20                     |

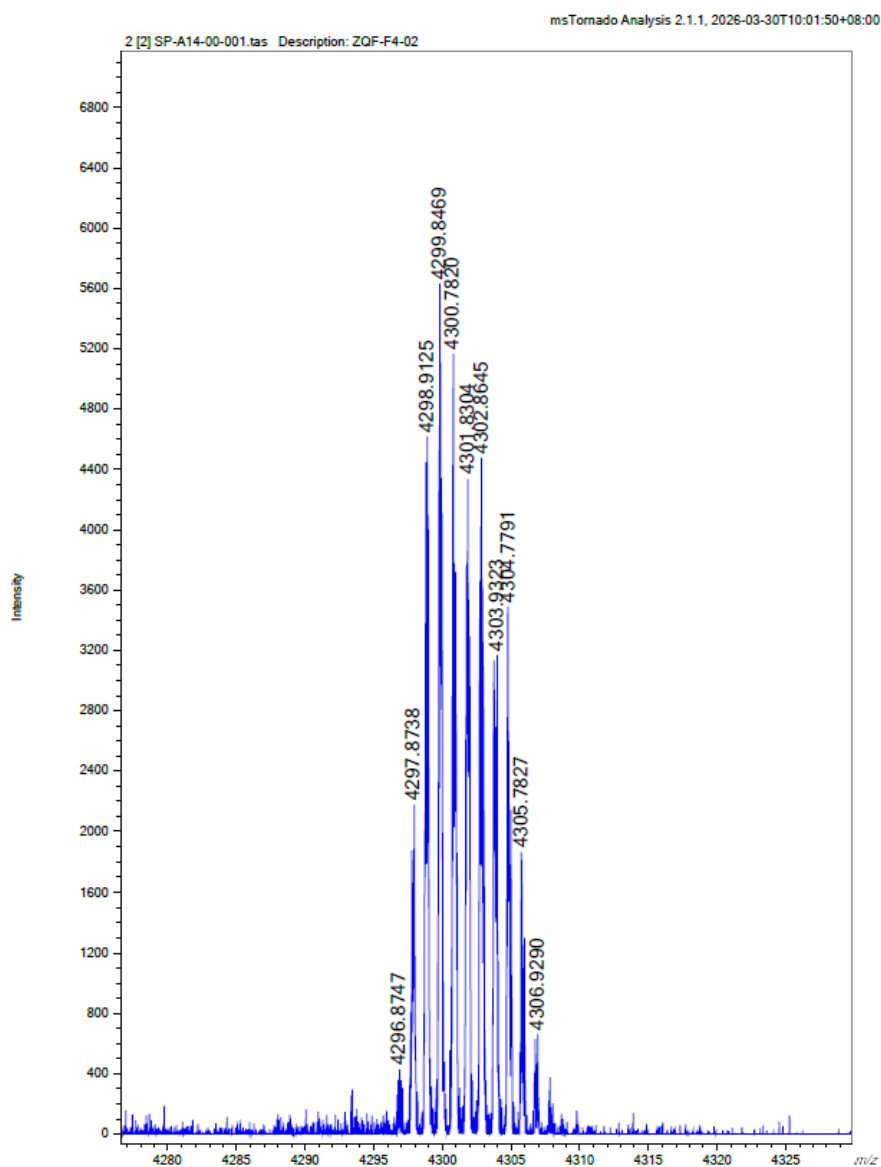

1/1

**Fig. S91.** Further measurements of the mass spectrum of compound **1d** (fourth measurement)

## 8. Appendix II: Cartesian coordinates of optimized structures

Calculated at the B3LYP-D3/6-31G(d,p) level. Coordinates (X, Y, Z) are in Angstroms.

### 1a-rac:

| <i>(M,M)</i> -1a-rac in the ground state |        |        |        | <i>(M,M)</i> -1a-rac in the first excited state |        |        |        |
|------------------------------------------|--------|--------|--------|-------------------------------------------------|--------|--------|--------|
| C                                        | 2.78   | -2.451 | 0.012  | C                                               | -2.759 | -2.457 | 0.063  |
| C                                        | 1.373  | -2.408 | 0.164  | C                                               | -1.372 | -2.427 | -0.09  |
| C                                        | 0.647  | -1.238 | 0.026  | C                                               | -0.63  | -1.235 | 0.005  |
| C                                        | 1.36   | 0.005  | 0.021  | C                                               | -1.341 | 0.006  | -0.017 |
| C                                        | 2.78   | 0.007  | 0.018  | C                                               | -2.765 | 0.008  | -0.015 |
| C                                        | 3.469  | -1.232 | -0.27  | C                                               | -3.452 | -1.217 | 0.315  |
| C                                        | 0.643  | 1.245  | 0.019  | C                                               | -0.626 | 1.246  | -0.04  |
| C                                        | 1.364  | 2.417  | -0.122 | C                                               | -1.365 | 2.44   | 0.056  |
| C                                        | 2.772  | 2.464  | 0.023  | C                                               | -2.752 | 2.474  | -0.094 |
| C                                        | 3.466  | 1.247  | 0.302  | C                                               | -3.449 | 1.235  | -0.343 |
| C                                        | -0.819 | -1.233 | -0.071 | C                                               | 0.814  | -1.231 | 0.062  |
| C                                        | -1.546 | -0.001 | 0.028  | C                                               | 1.54   | 0.002  | -0.02  |
| C                                        | -0.823 | 1.234  | 0.121  | C                                               | 0.818  | 1.238  | -0.099 |
| C                                        | -1.53  | -2.392 | -0.298 | C                                               | 1.541  | -2.414 | 0.252  |
| C                                        | -2.933 | -2.461 | -0.154 | C                                               | 2.926  | -2.47  | 0.107  |
| C                                        | -3.652 | -1.278 | 0.21   | C                                               | 3.649  | -1.267 | -0.236 |
| C                                        | -2.973 | -0.004 | 0.033  | C                                               | 2.972  | 0      | -0.024 |
| C                                        | -3.659 | 1.267  | -0.14  | C                                               | 3.655  | 1.263  | 0.186  |
| C                                        | -2.943 | 2.455  | 0.209  | C                                               | 2.934  | 2.471  | -0.144 |
| C                                        | -1.539 | 2.391  | 0.347  | C                                               | 1.549  | 2.418  | -0.288 |
| C                                        | 2.971  | -4.944 | 0.564  | C                                               | -2.989 | -4.955 | -0.46  |
| C                                        | 3.522  | -3.696 | 0.114  | C                                               | -3.523 | -3.702 | -0.024 |
| C                                        | 4.89   | -3.683 | -0.202 | C                                               | -4.887 | -3.671 | 0.307  |
| C                                        | 5.653  | -4.879 | -0.03  | C                                               | -5.659 | -4.864 | 0.163  |
| C                                        | 5.13   | -6.098 | 0.467  | C                                               | -5.15  | -6.097 | -0.316 |
| C                                        | 3.722  | -6.085 | 0.739  | C                                               | -3.75  | -6.099 | -0.603 |

|   |        |        |        |   |         |        |        |
|---|--------|--------|--------|---|---------|--------|--------|
| C | 6.997  | -4.842 | -0.384 | C | -7.001  | -4.811 | 0.528  |
| C | 7.9    | -5.88  | -0.279 | C | -7.912  | -5.847 | 0.451  |
| C | 7.398  | -7.089 | 0.222  | C | -7.424  | -7.069 | -0.029 |
| C | 6.04   | -7.206 | 0.598  | C | -6.072  | -7.204 | -0.417 |
| C | 5.512  | -2.494 | -0.739 | C | -5.498  | -2.465 | 0.823  |
| C | 6.883  | -2.518 | -1.145 | C | -6.866  | -2.469 | 1.229  |
| C | 7.596  | -3.691 | -0.934 | C | -7.588  | -3.644 | 1.051  |
| C | 4.798  | -1.29  | -0.844 | C | -4.773  | -1.259 | 0.893  |
| C | 5.456  | -0.204 | -1.522 | C | -5.431  | -0.15  | 1.535  |
| C | 6.768  | -0.246 | -1.923 | C | -6.743  | -0.174 | 1.935  |
| C | 7.569  | -1.419 | -1.717 | C | -7.55   | -1.35  | 1.766  |
| C | 8.964  | -1.591 | -2.013 | C | -8.945  | -1.504 | 2.063  |
| C | 9.63   | -2.81  | -1.75  | C | -9.62   | -2.73  | 1.837  |
| C | 8.932  | -3.9   | -1.215 | C | -8.928  | -3.837 | 1.338  |
| C | 9.282  | -5.37  | -0.81  | C | -9.285  | -5.318 | 0.982  |
| C | 9.683  | -6.26  | -1.996 | C | -9.664  | -6.17  | 2.204  |
| C | 10.375 | -5.318 | 0.269  | C | -10.397 | -5.306 | -0.077 |
| C | 10.206 | -7.537 | -1.739 | C | -10.197 | -7.452 | 1.999  |
| C | 10.513 | -8.416 | -2.776 | C | -10.483 | -8.297 | 3.07   |
| C | 10.29  | -8     | -4.097 | C | -10.227 | -7.841 | 4.372  |
| C | 9.772  | -6.737 | -4.382 | C | -9.699  | -6.571 | 4.606  |
| C | 9.472  | -5.873 | -3.318 | C | -9.421  | -5.742 | 3.509  |
| C | 11.718 | -5.186 | -0.115 | C | -11.731 | -5.143 | 0.328  |
| C | 12.735 | -5.078 | 0.835  | C | -12.767 | -5.078 | -0.603 |
| C | 12.39  | -5.102 | 2.193  | C | -12.453 | -5.178 | -1.967 |
| C | 11.062 | -5.225 | 2.603  | C | -11.134 | -5.332 | -2.398 |
| C | 10.061 | -5.328 | 1.628  | C | -10.113 | -5.39  | -1.44  |
| C | 5.58   | -8.516 | 1.129  | C | -5.628  | -8.524 | -0.932 |
| C | 9.758  | -0.461 | -2.566 | C | -9.738  | -0.356 | 2.574  |
| C | 9.392  | 0.186  | -3.753 | C | -9.368  | 0.343  | 3.731  |

|   |        |         |        |   |         |         |        |
|---|--------|---------|--------|---|---------|---------|--------|
| C | 10.138 | 1.26    | -4.251 | C | -10.116 | 1.435   | 4.186  |
| C | 11.258 | 1.691   | -3.532 | C | -11.242 | 1.83    | 3.456  |
| C | 11.653 | 1.059   | -2.346 | C | -11.641 | 1.146   | 2.302  |
| C | 10.905 | -0.027  | -1.887 | C | -10.891 | 0.045   | 1.885  |
| C | 4.898  | -8.606  | 2.354  | C | -4.948  | -8.639  | -2.155 |
| C | 4.492  | -9.84   | 2.869  | C | -4.558  | -9.883  | -2.655 |
| C | 4.776  | -10.999 | 2.137  | C | -4.856  | -11.03  | -1.909 |
| C | 5.457  | -10.945 | 0.916  | C | -5.535  | -10.952 | -0.689 |
| C | 5.855  | -9.697  | 0.426  | C | -5.918  | -9.694  | -0.214 |
| C | 5.464  | 0.225   | 1.541  | C | -5.437  | 0.172   | -1.552 |
| C | 4.799  | 1.31    | 0.868  | C | -4.773  | 1.28    | -0.914 |
| C | 5.509  | 2.514   | 0.756  | C | -5.495  | 2.487   | -0.839 |
| C | 6.884  | 2.54    | 1.149  | C | -6.867  | 2.492   | -1.234 |
| C | 7.577  | 1.442   | 1.713  | C | -7.557  | 1.373   | -1.762 |
| C | 6.779  | 0.269   | 1.93   | C | -6.752  | 0.197   | -1.939 |
| C | 7.594  | 3.713   | 0.929  | C | -7.587  | 3.667   | -1.048 |
| C | 8.933  | 3.922   | 1.192  | C | -8.931  | 3.859   | -1.317 |
| C | 9.639  | 2.832   | 1.717  | C | -9.628  | 2.752   | -1.806 |
| C | 8.976  | 1.613   | 1.99   | C | -8.956  | 1.526   | -2.039 |
| C | 4.881  | 3.702   | 0.222  | C | -4.879  | 3.692   | -0.326 |
| C | 5.642  | 4.897   | 0.039  | C | -5.65   | 4.885   | -0.175 |
| C | 6.989  | 4.862   | 0.382  | C | -6.994  | 4.833   | -0.529 |
| C | 3.511  | 3.711   | -0.086 | C | -3.514  | 3.72    | -0.003 |
| C | 2.955  | 4.957   | -0.535 | C | -2.976  | 4.971   | 0.432  |
| C | 3.704  | 6.098   | -0.72  | C | -3.735  | 6.116   | 0.583  |
| C | 5.114  | 6.114   | -0.459 | C | -5.137  | 6.116   | 0.305  |
| C | 6.023  | 7.22    | -0.605 | C | -6.059  | 7.222   | 0.419  |
| C | 7.385  | 7.105   | -0.241 | C | -7.414  | 7.088   | 0.044  |
| C | 7.891  | 5.9     | 0.261  | C | -7.906  | 5.868   | -0.437 |
| C | 9.279  | 5.39    | 0.778  | C | -9.286  | 5.338   | -0.952 |

|   |        |        |        |   |         |        |        |
|---|--------|--------|--------|---|---------|--------|--------|
| C | 10.359 | 5.335  | -0.314 | C | -10.382 | 5.321  | 0.124  |
| C | 9.695  | 6.285  | 1.956  | C | -9.685  | 6.193  | -2.165 |
| C | 11.706 | 5.204  | 0.055  | C | -11.721 | 5.163  | -0.263 |
| C | 12.712 | 5.093  | -0.906 | C | -12.744 | 5.094  | 0.684  |
| C | 12.352 | 5.113  | -2.261 | C | -12.409 | 5.185  | 2.042  |
| C | 11.019 | 5.234  | -2.655 | C | -11.085 | 5.334  | 2.455  |
| C | 10.029 | 5.34   | -1.669 | C | -10.077 | 5.396  | 1.482  |
| C | 9.505  | 5.9    | 3.282  | C | -9.471  | 5.767  | -3.475 |
| C | 9.821  | 6.767  | 4.339  | C | -9.77   | 6.598  | -4.565 |
| C | 10.331 | 8.031  | 4.043  | C | -10.288 | 7.87   | -4.318 |
| C | 10.533 | 8.444  | 2.718  | C | -10.514 | 8.325  | -3.011 |
| C | 10.212 | 7.562  | 1.688  | C | -10.208 | 7.478  | -1.947 |
| C | 9.778  | 0.481  | 2.526  | C | -9.755  | 0.374  | -2.533 |
| C | 5.558  | 8.527  | -1.141 | C | -5.611  | 8.54   | 0.938  |
| C | 4.867  | 8.61   | -2.36  | C | -4.922  | 8.648  | 2.157  |
| C | 4.457  | 9.84   | -2.88  | C | -4.53   | 9.891  | 2.66   |
| C | 4.748  | 11.004 | -2.158 | C | -4.835  | 11.041 | 1.922  |
| C | 5.439  | 10.958 | -0.943 | C | -5.524  | 10.969 | 0.707  |
| C | 5.84   | 9.713  | -0.448 | C | -5.909  | 9.713  | 0.228  |
| C | 9.433  | -0.169 | 3.718  | C | -9.405  | -0.329 | -3.693 |
| C | 10.186 | -1.246 | 4.198  | C | -10.157 | -1.426 | -4.129 |
| C | 11.29  | -1.678 | 3.456  | C | -11.269 | -1.82  | -3.377 |
| C | 11.663 | -1.044 | 2.265  | C | -11.649 | -1.132 | -2.219 |
| C | 10.909 | 0.046  | 1.823  | C | -10.894 | -0.027 | -1.821 |
| C | -3.019 | -4.914 | -0.866 | C | 3.051   | -4.926 | 0.809  |
| C | -3.619 | -3.729 | -0.316 | C | 3.631   | -3.74  | 0.257  |
| C | -4.97  | -3.806 | 0.043  | C | 4.974   | -3.805 | -0.131 |
| C | -5.656 | -5.05  | -0.116 | C | 5.665   | -5.05  | -0.004 |
| C | -5.065 | -6.235 | -0.621 | C | 5.087   | -6.244 | 0.495  |
| C | -3.696 | -6.102 | -1.025 | C | 3.733   | -6.119 | 0.936  |

|   |         |        |        |   |        |        |        |
|---|---------|--------|--------|---|--------|--------|--------|
| C | -6.991  | -5.1   | 0.262  | C | 6.994  | -5.09  | -0.404 |
| C | -7.818  | -6.203 | 0.196  | C | 7.827  | -6.191 | -0.366 |
| C | -7.251  | -7.377 | -0.312 | C | 7.272  | -7.377 | 0.13   |
| C | -5.893  | -7.408 | -0.705 | C | 5.922  | -7.42  | 0.544  |
| C | -5.644  | -2.661 | 0.615  | C | 5.638  | -2.646 | -0.691 |
| C | -7.011  | -2.771 | 1.023  | C | 6.999  | -2.744 | -1.11  |
| C | -7.658  | -3.982 | 0.799  | C | 7.652  | -3.959 | -0.923 |
| C | -4.986  | -1.427 | 0.768  | C | 4.973  | -1.405 | -0.804 |
| C | -5.699  | -0.409 | 1.497  | C | 5.688  | -0.366 | -1.505 |
| C | -7.01   | -0.53  | 1.89   | C | 6.996  | -0.476 | -1.907 |
| C | -7.754  | -1.728 | 1.626  | C | 7.742  | -1.682 | -1.685 |
| C | -9.138  | -1.982 | 1.912  | C | 9.123  | -1.925 | -1.981 |
| C | -9.734  | -3.234 | 1.637  | C | 9.725  | -3.186 | -1.744 |
| C | -8.979  | -4.273 | 1.08   | C | 8.974  | -4.24  | -1.217 |
| C | -9.219  | -5.784 | 0.748  | C | 9.22   | -5.758 | -0.925 |
| C | -9.589  | -6.484 | 2.066  | C | 9.571  | -6.424 | -2.266 |
| C | -10.255 | -6.047 | -0.352 | C | 10.269 | -6.049 | 0.155  |
| C | -8.642  | -7.158 | 2.837  | C | 8.611  | -7.073 | -3.042 |
| C | -8.987  | -7.732 | 4.069  | C | 8.937  | -7.612 | -4.295 |
| C | -10.304 | -7.618 | 4.519  | C | 10.246 | -7.489 | -4.76  |
| C | -11.275 | -6.94  | 3.768  | C | 11.231 | -6.836 | -4.004 |
| C | -10.904 | -6.382 | 2.545  | C | 10.879 | -6.311 | -2.761 |
| C | -10.726 | -7.355 | -0.543 | C | 10.75  | -7.359 | 0.299  |
| C | -11.59  | -7.667 | -1.592 | C | 11.627 | -7.699 | 1.33   |
| C | -11.985 | -6.642 | -2.462 | C | 12.022 | -6.7   | 2.229  |
| C | -11.536 | -5.332 | -2.293 | C | 11.561 | -5.388 | 2.107  |
| C | -10.666 | -5.045 | -1.23  | C | 10.681 | -5.074 | 1.062  |
| C | -5.346  | -8.698 | -1.202 | C | 5.386  | -8.72  | 1.025  |
| C | -10.006 | -0.937 | 2.518  | C | 9.991  | -0.863 | -2.556 |
| C | -9.718  | -0.399 | 3.781  | C | 9.698  | -0.279 | -3.796 |

|   |         |         |        |   |        |         |        |
|---|---------|---------|--------|---|--------|---------|--------|
| C | -10.583 | 0.513   | 4.391  | C | 10.566 | 0.648   | -4.38  |
| C | -11.746 | 0.892   | 3.709  | C | 11.736 | 0.994   | -3.693 |
| C | -12.041 | 0.403   | 2.433  | C | 12.037 | 0.457   | -2.437 |
| C | -11.165 | -0.52   | 1.851  | C | 11.159 | -0.479  | -1.883 |
| C | -6.019  | -9.41   | -2.206 | C | 6.09   | -9.462  | 1.984  |
| C | -5.541  | -10.638 | -2.672 | C | 5.622  | -10.701 | 2.432  |
| C | -4.369  | -11.157 | -2.112 | C | 4.43   | -11.201 | 1.897  |
| C | -3.676  | -10.477 | -1.103 | C | 3.707  | -10.49  | 0.931  |
| C | -4.175  | -9.25   | -0.658 | C | 4.195  | -9.252  | 0.505  |
| C | -3.022  | 4.932   | 0.844  | C | 3.048  | 4.952   | -0.76  |
| C | -3.634  | 3.723   | 0.366  | C | 3.644  | 3.74    | -0.287 |
| C | -4.996  | 3.783   | 0.042  | C | 5      | 3.788   | 0.061  |
| C | -5.69   | 5.022   | 0.209  | C | 5.7    | 5.026   | -0.077 |
| C | -5.101  | 6.213   | 0.7    | C | 5.125  | 6.227   | -0.562 |
| C | -3.705  | 6.114   | 1.009  | C | 3.738  | 6.14    | -0.895 |
| C | -7.02   | 5.071   | -0.187 | C | 7.026  | 5.064   | 0.336  |
| C | -7.839  | 6.181   | -0.16  | C | 7.851  | 6.171   | 0.336  |
| C | -7.28   | 7.357   | 0.352  | C | 7.306  | 7.358   | -0.167 |
| C | -5.935  | 7.383   | 0.786  | C | 5.969  | 7.397   | -0.62  |
| C | -5.666  | 2.634   | -0.528 | C | 5.66   | 2.625   | 0.618  |
| C | -7.032  | 2.74    | -0.944 | C | 7.021  | 2.717   | 1.042  |
| C | -7.682  | 3.951   | -0.729 | C | 7.677  | 3.932   | 0.861  |
| C | -4.998  | 1.406   | -0.689 | C | 4.985  | 1.391   | 0.744  |
| C | -5.706  | 0.385   | -1.419 | C | 5.693  | 0.35    | 1.447  |
| C | -7.014  | 0.503   | -1.821 | C | 7      | 0.456   | 1.856  |
| C | -7.764  | 1.699   | -1.567 | C | 7.752  | 1.658   | 1.639  |
| C | -9.139  | 1.96    | -1.89  | C | 9.126  | 1.905   | 1.967  |
| C | -9.735  | 3.216   | -1.63  | C | 9.729  | 3.167   | 1.742  |
| C | -8.992  | 4.249   | -1.049 | C | 8.99   | 4.217   | 1.191  |
| C | -9.229  | 5.766   | -0.742 | C | 9.234  | 5.74    | 0.921  |

|   |         |         |        |   |         |         |        |
|---|---------|---------|--------|---|---------|---------|--------|
| C | -10.295 | 6.052   | 0.321  | C | 10.309  | 6.049   | -0.127 |
| C | -9.551  | 6.45    | -2.082 | C | 9.543   | 6.391   | 2.279  |
| C | -10.774 | 7.362   | 0.47   | C | 10.801  | 7.358   | -0.232 |
| C | -11.667 | 7.696   | 1.488  | C | 11.703  | 7.714   | -1.236 |
| C | -12.081 | 6.69    | 2.371  | C | 12.11   | 6.733   | -2.149 |
| C | -11.623 | 5.378   | 2.245  | C | 11.637  | 5.422   | -2.066 |
| C | -10.726 | 5.07    | 1.212  | C | 10.734  | 5.091   | -1.047 |
| C | -8.57   | 7.095   | -2.836 | C | 8.557   | 7.025   | 3.036  |
| C | -8.869  | 7.652   | -4.088 | C | 8.844   | 7.554   | 4.302  |
| C | -10.173 | 7.552   | -4.574 | C | 10.143  | 7.437   | 4.801  |
| C | -11.177 | 6.903   | -3.841 | C | 11.152  | 6.8     | 4.066  |
| C | -10.852 | 6.36    | -2.598 | C | 10.838  | 6.285   | 2.808  |
| C | -5.404  | 8.663   | 1.324  | C | 5.454   | 8.685   | -1.153 |
| C | -9.996  | 0.926   | -2.529 | C | 9.982   | 0.852   | 2.574  |
| C | -9.649  | 0.357   | -3.765 | C | 9.638   | 0.249   | 3.795  |
| C | -10.501 | -0.541  | -4.411 | C | 10.491  | -0.668  | 4.412  |
| C | -11.718 | -0.87   | -3.797 | C | 11.706  | -0.98   | 3.786  |
| C | -12.078 | -0.345  | -2.554 | C | 12.062  | -0.422  | 2.556  |
| C | -11.208 | 0.559   | -1.932 | C | 11.191  | 0.499   | 1.962  |
| C | -5.571  | 9.855   | 0.603  | C | 5.629   | 9.871   | -0.424 |
| C | -5.104  | 11.076  | 1.098  | C | 5.178   | 11.099  | -0.915 |
| C | -4.465  | 11.094  | 2.343  | C | 4.547   | 11.132  | -2.163 |
| C | -4.288  | 9.925   | 3.092  | C | 4.364   | 9.969   | -2.921 |
| C | -4.761  | 8.717   | 2.571  | C | 4.82    | 8.753   | -2.404 |
| C | 5.721   | -12.202 | 0.121  | C | -5.814  | -12.196 | 0.123  |
| C | 3.797   | -9.928  | 4.207  | C | -3.865  | -9.998  | -3.993 |
| C | 9.724   | 1.936   | -5.538 | C | -9.695  | 2.171   | 5.437  |
| C | 12.826  | 1.569   | -1.545 | C | -12.824 | 1.614   | 1.488  |
| C | 12.82   | -1.555  | 1.439  | C | -12.815 | -1.6    | -1.382 |
| C | 9.795   | -1.926  | 5.49   | C | -9.755  | -2.169  | -5.382 |

|   |         |         |        |   |         |         |        |
|---|---------|---------|--------|---|---------|---------|--------|
| C | 3.751   | 9.92    | -4.213 | C | -3.826  | 9.999   | 3.993  |
| C | 5.71    | 12.22   | -0.158 | C | -5.811  | 12.217  | -0.095 |
| C | -2.44   | -11.081 | -0.479 | C | 2.448   | -11.073 | 0.333  |
| C | -6.254  | -11.366 | -3.788 | C | 6.369   | -11.463 | 3.502  |
| C | -10.299 | 1.046   | 5.776  | C | 10.275  | 1.233   | -5.742 |
| C | -13.259 | 0.887   | 1.681  | C | 13.263  | 0.906   | -1.678 |
| C | -3.639  | 9.974   | 4.455  | C | 3.724   | 10.034  | -4.288 |
| C | -5.248  | 12.342  | 0.287  | C | 5.33    | 12.359  | -0.095 |
| C | -10.143 | -1.137  | -5.751 | C | 10.125  | -1.319  | 5.725  |
| C | -13.361 | -0.764  | -1.876 | C | 13.343  | -0.823  | 1.862  |
| C | -7.939  | -8.44   | 4.894  | C | 7.873   | -8.297  | -5.121 |
| C | -12.687 | -6.804  | 4.286  | C | 12.636  | -6.69   | -4.539 |
| C | -12.112 | -9.073  | -1.774 | C | 12.16   | -9.107  | 1.461  |
| C | -11.979 | -4.227  | -3.219 | C | 12.006  | -4.312  | 3.065  |
| C | -12.087 | 4.296   | 3.188  | C | 12.094  | 4.366   | -3.042 |
| C | -12.197 | 9.104   | 1.625  | C | 12.248  | 9.12    | -1.324 |
| C | -7.784  | 8.327   | -4.894 | C | 7.753   | 8.215   | 5.111  |
| C | -12.576 | 6.78    | -4.399 | C | 12.543  | 6.659   | 4.637  |
| C | 9.594   | 6.325   | 5.766  | C | -9.509  | 6.116   | -5.973 |
| C | 11.108  | 9.81    | 2.423  | C | -11.103 | 9.695   | -2.768 |
| C | 14.157  | 4.927   | -0.498 | C | -14.181 | 4.9     | 0.26   |
| C | 10.631  | 5.276   | -4.114 | C | -10.724 | 5.454   | 3.916  |
| C | 11.099  | -9.78   | -2.492 | C | -11.082 | -9.665  | 2.842  |
| C | 9.517   | -6.295  | -5.804 | C | -9.406  | -6.088  | 6.007  |
| C | 14.174  | -4.906  | 0.41   | C | -14.197 | -4.878  | -0.16  |
| C | 10.691  | -5.271  | 4.066  | C | -10.796 | -5.461  | -3.863 |
| H | 0.846   | -3.337  | 0.331  | H | -0.845  | -3.356  | -0.266 |
| H | 0.833   | 3.345   | -0.288 | H | -0.836  | 3.367   | 0.231  |
| H | -0.991  | -3.302  | -0.52  | H | 1.004   | -3.323  | 0.481  |
| H | -1      | 3.302   | 0.571  | H | 1.012   | 3.326   | -0.521 |

|   |        |         |        |   |         |         |        |
|---|--------|---------|--------|---|---------|---------|--------|
| H | 1.914  | -4.997  | 0.804  | H | -1.936  | -5.017  | -0.714 |
| H | 3.234  | -6.99   | 1.083  | H | -3.269  | -7.012  | -0.935 |
| H | 8.041  | -7.955  | 0.346  | H | -8.075  | -7.932  | -0.131 |
| H | 4.892  | 0.701   | -1.711 | H | -4.864  | 0.758   | 1.693  |
| H | 7.202  | 0.627   | -2.394 | H | -7.174  | 0.717   | 2.374  |
| H | 10.687 | -2.881  | -1.991 | H | -10.676 | -2.787  | 2.081  |
| H | 10.387 | -7.839  | -0.711 | H | -10.402 | -7.785  | 0.986  |
| H | 10.527 | -8.677  | -4.915 | H | -10.446 | -8.492  | 5.216  |
| H | 9.066  | -4.889  | -3.532 | H | -9.007  | -4.754  | 3.682  |
| H | 11.971 | -5.187  | -1.171 | H | -11.96  | -5.088  | 1.388  |
| H | 13.176 | -5.029  | 2.943  | H | -13.254 | -5.14   | -2.702 |
| H | 9.026  | -5.424  | 1.939  | H | -9.085  | -5.51   | -1.768 |
| H | 8.523  | -0.166  | -4.303 | H | -8.496  | 0.017   | 4.292  |
| H | 11.833 | 2.538   | -3.896 | H | -11.82  | 2.688   | 3.789  |
| H | 11.193 | -0.537  | -0.974 | H | -11.182 | -0.503  | 0.995  |
| H | 4.705  | -7.699  | 2.919  | H | -4.744  | -7.741  | -2.733 |
| H | 4.461  | -11.965 | 2.528  | H | -4.553  | -12.004 | -2.288 |
| H | 6.372  | -9.634  | -0.528 | H | -6.433  | -9.613  | 0.74   |
| H | 4.902  | -0.68   | 1.737  | H | -4.871  | -0.737  | -1.715 |
| H | 7.219  | -0.604  | 2.398  | H | -7.188  | -0.695  | -2.375 |
| H | 10.699 | 2.903   | 1.943  | H | -10.689 | 2.807   | -2.033 |
| H | 1.896  | 5.008   | -0.767 | H | -1.921  | 5.033   | 0.68   |
| H | 3.212  | 7.001   | -1.064 | H | -3.252  | 7.028   | 0.914  |
| H | 8.026  | 7.97    | -0.378 | H | -8.065  | 7.949   | 0.157  |
| H | 11.972 | 5.209   | 1.108  | H | -11.967 | 5.114   | -1.32  |
| H | 13.129 | 5.039   | -3.019 | H | -13.2   | 5.144   | 2.789  |
| H | 8.991  | 5.435   | -1.968 | H | -9.044  | 5.512   | 1.796  |
| H | 9.105  | 4.916   | 3.504  | H | -9.065  | 4.777   | -3.659 |
| H | 10.579 | 8.711   | 4.856  | H | -10.524 | 8.522   | -5.157 |
| H | 10.377 | 7.862   | 0.656  | H | -10.392 | 7.81    | -0.929 |

|   |         |         |        |   |        |         |        |
|---|---------|---------|--------|---|--------|---------|--------|
| H | 4.668   | 7.699   | -2.918 | H | -4.712 | 7.748   | 2.728  |
| H | 4.431   | 11.967  | -2.553 | H | -4.531 | 12.014  | 2.304  |
| H | 6.365   | 9.655   | 0.502  | H | -6.431 | 9.636   | -0.722 |
| H | 8.576   | 0.184   | 4.286  | H | -8.544 | -0.003  | -4.271 |
| H | 11.87   | -2.527  | 3.807  | H | -11.85 | -2.682  | -3.695 |
| H | 11.18   | 0.556   | 0.905  | H | -11.17 | 0.524   | -0.927 |
| H | -1.993  | -4.873  | -1.215 | H | 2.034  | -4.889  | 1.186  |
| H | -3.186  | -6.943  | -1.48  | H | 3.235  | -6.966  | 1.395  |
| H | -7.829  | -8.292  | -0.386 | H | 7.857  | -8.29   | 0.178  |
| H | -5.178  | 0.509   | 1.738  | H | 5.167  | 0.56    | -1.711 |
| H | -7.485  | 0.296   | 2.407  | H | 7.469  | 0.367   | -2.398 |
| H | -10.778 | -3.373  | 1.902  | H | 10.768 | -3.314  | -2.015 |
| H | -7.622  | -7.248  | 2.478  | H | 7.595  | -7.169  | -2.672 |
| H | -10.584 | -8.068  | 5.469  | H | 10.512 | -7.912  | -5.727 |
| H | -11.651 | -5.874  | 1.941  | H | 11.635 | -5.821  | -2.154 |
| H | -10.415 | -8.136  | 0.144  | H | 10.439 | -8.12   | -0.411 |
| H | -12.655 | -6.874  | -3.288 | H | 12.7   | -6.954  | 3.042  |
| H | -10.302 | -4.031  | -1.098 | H | 10.308 | -4.059  | 0.966  |
| H | -8.823  | -0.726  | 4.303  | H | 8.797  | -0.581  | -4.323 |
| H | -12.434 | 1.587   | 4.182  | H | 12.426 | 1.701   | -4.147 |
| H | -11.372 | -0.915  | 0.859  | H | 11.37  | -0.91   | -0.908 |
| H | -6.92   | -8.983  | -2.639 | H | 7.006  | -9.051  | 2.4    |
| H | -3.987  | -12.112 | -2.467 | H | 4.057  | -12.164 | 2.237  |
| H | -3.662  | -8.721  | 0.14   | H | 3.658  | -8.701  | -0.262 |
| H | -1.97   | 4.924   | 1.106  | H | 2.001  | 4.951   | -1.042 |
| H | -3.171  | 6.987   | 1.366  | H | 3.212  | 7.018   | -1.248 |
| H | -7.87   | 8.263   | 0.447  | H | 7.904  | 8.26    | -0.244 |
| H | -5.181  | -0.531  | -1.657 | H | 5.168  | -0.573  | 1.654  |
| H | -7.481  | -0.326  | -2.34  | H | 7.464  | -0.389  | 2.352  |
| H | -10.768 | 3.364   | -1.93  | H | 10.763 | 3.302   | 2.045  |

|   |         |         |        |   |         |         |        |
|---|---------|---------|--------|---|---------|---------|--------|
| H | -10.446 | 8.129   | -0.226 | H | 10.478  | 8.106   | 0.486  |
| H | -12.773 | 6.939   | 3.174  | H | 12.807  | 7       | -2.941 |
| H | -10.355 | 4.054   | 1.113  | H | 10.351  | 4.076   | -0.983 |
| H | -7.559  | 7.173   | -2.45  | H | 7.551   | 7.115   | 2.64   |
| H | -10.419 | 7.99    | -5.54  | H | 10.379  | 7.853   | 5.778  |
| H | -11.624 | 5.874   | -2.009 | H | 11.615  | 5.807   | 2.217  |
| H | -8.717  | 0.651   | -4.239 | H | 8.708   | 0.531   | 4.28   |
| H | -12.396 | -1.553  | -4.302 | H | 12.387  | -1.675  | 4.271  |
| H | -11.467 | 0.981   | -0.964 | H | 11.448  | 0.949   | 1.006  |
| H | -6.056  | 9.819   | -0.369 | H | 6.107   | 9.824   | 0.551  |
| H | -4.097  | 12.039  | 2.738  | H | 4.192   | 12.083  | -2.555 |
| H | -4.652  | 7.804   | 3.149  | H | 4.705   | 7.846   | -2.99  |
| H | 4.901   | -12.404 | -0.58  | H | -4.997  | -12.399 | 0.826  |
| H | 6.638   | -12.116 | -0.47  | H | -6.73   | -12.092 | 0.711  |
| H | 5.816   | -13.076 | 0.772  | H | -5.919  | -13.078 | -0.518 |
| H | 4.509   | -10.171 | 5.006  | H | -4.577  | -10.263 | -4.784 |
| H | 3.031   | -10.71  | 4.209  | H | -3.094  | -10.775 | -3.978 |
| H | 3.317   | -8.982  | 4.474  | H | -3.391  | -9.055  | -4.282 |
| H | 9.517   | 1.201   | -6.323 | H | -9.43   | 1.474   | 6.239  |
| H | 8.808   | 2.523   | -5.4   | H | -8.811  | 2.795   | 5.251  |
| H | 10.5    | 2.614   | -5.904 | H | -10.489 | 2.826   | 5.805  |
| H | 13.531  | 2.125   | -2.17  | H | -13.527 | 2.192   | 2.094  |
| H | 12.484  | 2.254   | -0.761 | H | -12.492 | 2.266   | 0.673  |
| H | 13.367  | 0.749   | -1.062 | H | -13.363 | 0.77    | 1.046  |
| H | 13.542  | -2.102  | 2.052  | H | -13.533 | -2.173  | -1.976 |
| H | 13.344  | -0.736  | 0.937  | H | -13.342 | -0.756  | -0.925 |
| H | 12.462  | -2.248  | 0.669  | H | -12.468 | -2.257  | -0.577 |
| H | 10.577  | -2.603  | 5.842  | H | -10.559 | -2.817  | -5.741 |
| H | 8.878   | -2.515  | 5.366  | H | -8.876  | -2.801  | -5.202 |
| H | 9.599   | -1.193  | 6.28   | H | -9.49   | -1.476  | -6.188 |

|   |         |         |        |   |        |         |        |
|---|---------|---------|--------|---|--------|---------|--------|
| H | 4.456   | 10.156  | -5.019 | H | -4.532 | 10.262  | 4.791  |
| H | 2.985   | 10.703  | -4.214 | H | -3.055 | 10.776  | 3.975  |
| H | 3.267   | 8.973   | -4.469 | H | -3.351 | 9.055   | 4.274  |
| H | 4.893   | 12.431  | 0.543  | H | -4.996 | 12.427  | -0.8   |
| H | 5.807   | 13.089  | -0.816 | H | -5.917 | 13.094  | 0.551  |
| H | 6.628   | 12.135  | 0.431  | H | -6.729 | 12.113  | -0.682 |
| H | -1.813  | -10.318 | -0.009 | H | 1.82   | -10.298 | -0.116 |
| H | -1.832  | -11.606 | -1.224 | H | 1.852  | -11.596 | 1.088  |
| H | -2.705  | -11.811 | 0.296  | H | 2.685  | -11.8   | -0.454 |
| H | -7.332  | -11.18  | -3.762 | H | 7.445  | -11.275 | 3.45   |
| H | -6.093  | -12.447 | -3.728 | H | 6.207  | -12.542 | 3.413  |
| H | -5.89   | -11.035 | -4.769 | H | 6.034  | -11.164 | 4.503  |
| H | -9.23   | 1.013   | 6.006  | H | 9.205  | 1.209   | -5.968 |
| H | -10.817 | 0.454   | 6.541  | H | 10.789 | 0.67    | -6.531 |
| H | -10.637 | 2.082   | 5.882  | H | 10.613 | 2.272   | -5.811 |
| H | -14.033 | 1.253   | 2.362  | H | 14.035 | 1.293   | -2.35  |
| H | -12.999 | 1.714   | 1.008  | H | 13.014 | 1.707   | -0.971 |
| H | -13.693 | 0.094   | 1.067  | H | 13.697 | 0.086   | -1.097 |
| H | -4.376  | 10.204  | 5.234  | H | 4.466  | 10.277  | -5.059 |
| H | -3.178  | 9.016   | 4.714  | H | 3.269  | 9.078   | -4.564 |
| H | -2.866  | 10.747  | 4.502  | H | 2.948  | 10.805  | -4.33  |
| H | -5.369  | 13.219  | 0.931  | H | 5.455  | 13.24   | -0.732 |
| H | -6.111  | 12.292  | -0.384 | H | 6.193  | 12.3    | 0.576  |
| H | -4.361  | 12.515  | -0.334 | H | 4.444  | 12.532  | 0.529  |
| H | -10.171 | -2.232  | -5.716 | H | 9.931  | -2.39   | 5.592  |
| H | -9.141  | -0.838  | -6.071 | H | 9.228  | -0.871  | 6.16   |
| H | -10.85  | -0.822  | -6.527 | H | 10.938 | -1.228  | 6.454  |
| H | -14.058 | -1.225  | -2.581 | H | 14.054 | -1.277  | 2.558  |
| H | -13.164 | -1.496  | -1.082 | H | 13.144 | -1.557  | 1.07   |
| H | -13.865 | 0.089   | -1.41  | H | 13.83  | 0.037   | 1.391  |

|   |         |        |        |   |         |        |        |
|---|---------|--------|--------|---|---------|--------|--------|
| H | -8.391  | -9.101 | 5.64   | H | 8.31    | -8.88  | -5.937 |
| H | -7.275  | -9.042 | 4.264  | H | 7.265   | -8.97  | -4.509 |
| H | -7.308  | -7.72  | 5.43   | H | 7.19    | -7.563 | -5.568 |
| H | -13.386 | -6.549 | 3.484  | H | 13.342  | -6.427 | -3.747 |
| H | -12.753 | -6.014 | 5.045  | H | 12.687  | -5.902 | -5.301 |
| H | -13.033 | -7.731 | 4.755  | H | 12.982  | -7.616 | -5.01  |
| H | -11.484 | -9.804 | -1.257 | H | 11.527  | -9.826 | 0.933  |
| H | -13.128 | -9.172 | -1.374 | H | 13.17   | -9.187 | 1.04   |
| H | -12.154 | -9.35  | -2.833 | H | 12.222  | -9.414 | 2.51   |
| H | -12.754 | -3.608 | -2.752 | H | 12.803  | -3.699 | 2.627  |
| H | -11.15  | -3.557 | -3.464 | H | 11.185  | -3.632 | 3.307  |
| H | -12.39  | -4.622 | -4.153 | H | 12.39   | -4.734 | 3.999  |
| H | -12.462 | 4.713  | 4.128  | H | 12.473  | 4.808  | -3.968 |
| H | -12.898 | 3.706  | 2.743  | H | 12.898  | 3.755  | -2.614 |
| H | -11.279 | 3.597  | 3.418  | H | 11.279  | 3.682  | -3.294 |
| H | -11.564 | 9.824  | 1.098  | H | 11.609  | 9.832  | -0.794 |
| H | -12.256 | 9.408  | 2.675  | H | 12.334  | 9.451  | -2.364 |
| H | -13.208 | 9.188  | 1.207  | H | 13.25   | 9.184  | -0.881 |
| H | -7.114  | 8.909  | -4.253 | H | 7.095   | 8.817  | 4.476  |
| H | -7.167  | 7.587  | -5.418 | H | 7.125   | 7.466  | 5.609  |
| H | -8.202  | 9      | -5.649 | H | 8.165   | 8.866  | 5.888  |
| H | -13.301 | 6.545  | -3.615 | H | 13.275  | 6.423  | 3.859  |
| H | -12.893 | 7.706  | -4.89  | H | 12.865  | 7.579  | 5.137  |
| H | -12.631 | 5.981  | -5.149 | H | 12.583  | 5.855  | 5.382  |
| H | 10.102  | 5.375  | 5.972  | H | -9.924  | 5.115  | -6.133 |
| H | 9.962   | 7.065  | 6.482  | H | -9.947  | 6.788  | -6.717 |
| H | 8.528   | 6.166  | 5.965  | H | -8.433  | 6.053  | -6.174 |
| H | 12.176  | 9.852  | 2.672  | H | -12.182 | 9.702  | -2.968 |
| H | 10.61   | 10.587 | 3.011  | H | -10.649 | 10.446 | -3.422 |
| H | 11.006  | 10.068 | 1.365  | H | -10.959 | 10.015 | -1.732 |

|   |        |         |        |   |         |         |        |
|---|--------|---------|--------|---|---------|---------|--------|
| H | 14.442 | 3.867   | -0.491 | H | -14.487 | 3.854   | 0.378  |
| H | 14.338 | 5.321   | 0.506  | H | -14.33  | 5.17    | -0.789 |
| H | 14.831 | 5.439   | -1.192 | H | -14.862 | 5.506   | 0.867  |
| H | 9.812  | 4.58    | -4.322 | H | -9.899  | 4.783   | 4.173  |
| H | 11.47  | 5.012   | -4.763 | H | -11.572 | 5.21    | 4.563  |
| H | 10.288 | 6.276   | -4.402 | H | -10.402 | 6.474   | 4.16   |
| H | 10.615 | -10.555 | -3.097 | H | -10.626 | -10.415 | 3.496  |
| H | 12.169 | -9.808  | -2.73  | H | -12.159 | -9.665  | 3.052  |
| H | 10.987 | -10.053 | -1.439 | H | -10.95  | -9.993  | 1.807  |
| H | 9.934  | -7      | -6.528 | H | -9.823  | -6.761  | 6.761  |
| H | 8.441  | -6.211  | -6.003 | H | -8.326  | -6.02   | 6.182  |
| H | 9.956  | -5.31   | -5.999 | H | -9.822  | -5.089  | 6.177  |
| H | 14.451 | -3.845  | 0.384  | H | -14.5   | -3.83   | -0.277 |
| H | 14.348 | -5.314  | -0.59  | H | -14.331 | -5.143  | 0.893  |
| H | 14.859 | -5.403  | 1.104  | H | -14.889 | -5.483  | -0.754 |
| H | 11.536 | -5.004  | 4.706  | H | -11.653 | -5.221  | -4.499 |
| H | 9.87   | -4.581  | 4.284  | H | -9.976  | -4.79   | -4.137 |
| H | 10.358 | -6.275  | 4.357  | H | -10.476 | -6.481  | -4.107 |

**1a-meso and perylene in ground states:**

| <b>1a-meso</b> in the ground state |        |        |        | <b>Perylene</b> in the ground state |        |        |       |
|------------------------------------|--------|--------|--------|-------------------------------------|--------|--------|-------|
| C                                  | -2.871 | -2.413 | -0.076 | C                                   | -2.886 | 2.422  | 0.001 |
| C                                  | -1.471 | -2.36  | -0.264 | C                                   | -1.479 | 2.427  | 0     |
| C                                  | -0.737 | -1.199 | -0.103 | C                                   | -0.738 | 1.25   | 0     |
| C                                  | -1.45  | 0.042  | 0.013  | C                                   | -1.439 | 0      | 0     |
| C                                  | -2.874 | 0.038  | 0.048  | C                                   | -2.874 | 0      | 0     |
| C                                  | -3.55  | -1.217 | 0.3    | C                                   | -3.575 | 1.232  | 0     |
| C                                  | -0.74  | 1.287  | 0.079  | C                                   | -0.738 | -1.25  | 0     |
| C                                  | -1.474 | 2.453  | 0.184  | C                                   | -1.479 | -2.427 | 0     |
| C                                  | -2.878 | 2.5    | 0.021  | C                                   | 2.886  | -2.422 | 0.001 |

|   |        |        |        |   |        |        |        |
|---|--------|--------|--------|---|--------|--------|--------|
| C | -3.579 | 1.278  | -0.208 | C | -3.575 | -1.232 | 0      |
| C | 0.735  | -1.199 | -0.091 | C | 0.738  | 1.25   | 0      |
| C | 1.445  | 0.045  | 0.006  | C | 1.439  | 0      | 0      |
| C | 0.734  | 1.289  | 0.061  | C | 0.738  | -1.25  | 0      |
| C | 1.469  | -2.364 | -0.213 | C | 1.479  | 2.427  | 0      |
| C | 2.87   | -2.412 | -0.024 | C | 2.886  | 2.422  | 0      |
| C | 3.549  | -1.204 | 0.311  | C | 3.575  | 1.232  | 0      |
| C | 2.869  | 0.044  | 0.032  | C | 2.874  | 0      | 0      |
| C | 3.571  | 1.278  | -0.256 | C | 3.575  | -1.232 | 0      |
| C | 2.868  | 2.505  | -0.054 | C | -2.886 | -2.422 | -0.001 |
| C | 1.466  | 2.46   | 0.123  | C | 1.479  | -2.427 | 0      |
| C | -3.08  | -4.846 | -0.836 | H | -3.421 | 3.367  | 0.001  |
| C | -3.613 | -3.65  | -0.247 | H | -0.978 | 3.388  | 0.001  |
| C | -4.971 | -3.663 | 0.105  | H | -4.661 | 1.218  | 0      |
| C | -5.734 | -4.849 | -0.125 | H | -0.978 | -3.388 | -0.001 |
| C | -5.212 | -6.042 | -0.685 | H | 3.421  | -3.367 | 0.001  |
| C | -3.829 | -5.98  | -1.057 | H | -4.662 | -1.218 | 0      |
| C | -7.079 | -4.826 | 0.227  | H | 0.978  | 3.388  | -0.001 |
| C | -7.98  | -5.861 | 0.077  | H | 3.421  | 3.367  | -0.001 |
| C | -7.475 | -7.05  | -0.465 | H | 4.661  | 1.218  | 0      |
| C | -6.115 | -7.152 | -0.841 | H | 4.662  | -1.218 | 0      |
| C | -5.581 | -2.512 | 0.732  | H | -3.421 | -3.367 | -0.001 |
| C | -6.947 | -2.562 | 1.152  | H | 0.978  | -3.388 | 0.001  |
| C | -7.671 | -3.711 | 0.853  |   |        |        |        |
| C | -4.863 | -1.318 | 0.907  |   |        |        |        |
| C | -5.507 | -0.28  | 1.668  |   |        |        |        |
| C | -6.805 | -0.361 | 2.111  |   |        |        |        |
| C | -7.611 | -1.518 | 1.84   |   |        |        |        |
| C | -8.99  | -1.729 | 2.186  |   |        |        |        |
| C | -9.669 | -2.916 | 1.822  |   |        |        |        |

|   |         |         |        |
|---|---------|---------|--------|
| C | -8.999  | -3.944  | 1.149  |
| C | -9.348  | -5.396  | 0.679  |
| C | -9.677  | -6.341  | 1.85   |
| C | -10.499 | -5.361  | -0.338 |
| C | -10.265 | -7.586  | 1.578  |
| C | -10.509 | -8.509  | 2.595  |
| C | -10.161 | -8.168  | 3.91   |
| C | -9.575  | -6.937  | 4.209  |
| C | -9.333  | -6.032  | 3.166  |
| C | -11.796 | -5.089  | 0.119  |
| C | -12.884 | -5.064  | -0.755 |
| C | -12.66  | -5.327  | -2.112 |
| C | -11.379 | -5.6    | -2.598 |
| C | -10.303 | -5.601  | -1.7   |
| C | -5.646  | -8.45   | -1.393 |
| C | -9.749  | -0.728  | 2.981  |
| C | -9.261  | -0.258  | 4.212  |
| C | -10.011 | 0.617   | 5.001  |
| C | -11.273 | 1.019   | 4.545  |
| C | -11.78  | 0.583   | 3.317  |
| C | -11.008 | -0.295  | 2.549  |
| C | -4.522  | -9.103  | -0.862 |
| C | -4.097  | -10.337 | -1.36  |
| C | -4.815  | -10.92  | -2.411 |
| C | -5.941  | -10.299 | -2.96  |
| C | -6.347  | -9.066  | -2.439 |
| C | -5.63   | 0.23    | -1.339 |
| C | -4.931  | 1.332   | -0.731 |
| C | -5.63   | 2.547   | -0.655 |
| C | -7.02   | 2.565   | -0.995 |

|   |         |       |        |
|---|---------|-------|--------|
| C | -7.753  | 1.436 | -1.433 |
| C | -6.969  | 0.252 | -1.635 |
| C | -7.702  | 3.768 | -0.858 |
| C | -9.048  | 3.979 | -1.084 |
| C | -9.795  | 2.856 | -1.465 |
| C | -9.167  | 1.601 | -1.638 |
| C | -4.968  | 3.76  | -0.23  |
| C | -5.698  | 4.987 | -0.148 |
| C | -7.05   | 4.955 | -0.47  |
| C | -3.594  | 3.765 | 0.053  |
| C | -3.004  | 5.034 | 0.382  |
| C | -3.721  | 6.206 | 0.464  |
| C | -5.133  | 6.234 | 0.218  |
| C | -6.01   | 7.375 | 0.263  |
| C | -7.377  | 7.262 | -0.079 |
| C | -7.916  | 6.029 | -0.466 |
| C | -9.33   | 5.508 | -0.885 |
| C | -10.303 | 5.837 | 0.254  |
| C | -9.808  | 6.063 | -2.237 |
| C | -10.886 | 7.108 | 0.314  |
| C | -11.691 | 7.488 | 1.393  |
| C | -11.9   | 6.57  | 2.426  |
| C | -11.327 | 5.293 | 2.394  |
| C | -10.533 | 4.937 | 1.299  |
| C | -8.953  | 6.737 | -3.106 |
| C | -9.394  | 7.17  | -4.366 |
| C | -10.712 | 6.913 | -4.741 |
| C | -11.596 | 6.237 | -3.886 |
| C | -11.131 | 5.819 | -2.641 |
| C | -10.012 | 0.423 | -1.972 |

|   |         |        |        |
|---|---------|--------|--------|
| C | -5.506  | 8.712  | 0.674  |
| C | -5.77   | 9.839  | -0.117 |
| C | -5.334  | 11.113 | 0.263  |
| C | -4.626  | 11.248 | 1.462  |
| C | -4.352  | 10.145 | 2.278  |
| C | -4.796  | 8.884  | 1.873  |
| C | -9.724  | -0.404 | -3.067 |
| C | -10.48  | -1.55  | -3.329 |
| C | -11.559 | -1.85  | -2.491 |
| C | -11.893 | -1.028 | -1.41  |
| C | -11.113 | 0.107  | -1.162 |
| C | 3.067   | -4.886 | -0.654 |
| C | 3.614   | -3.652 | -0.163 |
| C | 4.982   | -3.644 | 0.15   |
| C | 5.751   | -4.827 | -0.071 |
| C | 5.229   | -6.036 | -0.594 |
| C | 3.821   | -6.019 | -0.863 |
| C | 7.096   | -4.795 | 0.282  |
| C | 7.993   | -5.838 | 0.173  |
| C | 7.49    | -7.038 | -0.346 |
| C | 6.137   | -7.143 | -0.74  |
| C | 5.592   | -2.477 | 0.747  |
| C | 6.96    | -2.513 | 1.161  |
| C | 7.686   | -3.666 | 0.885  |
| C | 4.868   | -1.285 | 0.909  |
| C | 5.51    | -0.23  | 1.648  |
| C | 6.809   | -0.299 | 2.089  |
| C | 7.619   | -1.457 | 1.837  |
| C | 8.996   | -1.662 | 2.196  |
| C | 9.676   | -2.856 | 1.86   |

|   |        |         |        |
|---|--------|---------|--------|
| C | 9.011  | -3.896  | 1.2    |
| C | 9.359  | -5.36   | 0.769  |
| C | 10.517 | -5.353  | -0.24  |
| C | 9.675  | -6.278  | 1.965  |
| C | 11.811 | -5.072  | 0.219  |
| C | 12.905 | -5.067  | -0.647 |
| C | 12.69  | -5.361  | -2     |
| C | 11.412 | -5.645  | -2.488 |
| C | 10.33  | -5.625  | -1.597 |
| C | 9.322  | -5.936  | 3.27   |
| C | 9.541  | -6.823  | 4.335  |
| C | 10.117 | -8.065  | 4.069  |
| C | 10.479 | -8.436  | 2.765  |
| C | 10.252 | -7.535  | 1.726  |
| C | 5.676  | -8.441  | -1.299 |
| C | 9.749  | -0.649  | 2.981  |
| C | 9.253  | -0.159  | 4.2    |
| C | 9.998  | 0.727   | 4.981  |
| C | 11.264 | 1.121   | 4.527  |
| C | 11.779 | 0.665   | 3.31   |
| C | 11.012 | -0.225  | 2.55   |
| C | 5.005  | -8.505  | -2.531 |
| C | 4.598  | -9.727  | -3.073 |
| C | 4.872  | -10.901 | -2.361 |
| C | 5.542  | -10.873 | -1.133 |
| C | 5.941  | -9.637  | -0.616 |
| C | 2.991  | 5.047   | 0.24   |
| C | 3.582  | 3.772   | -0.057 |
| C | 4.957  | 3.761   | -0.34  |
| C | 5.686  | 4.99    | -0.285 |

|   |        |       |        |
|---|--------|-------|--------|
| C | 5.12   | 6.244 | 0.054  |
| C | 3.708  | 6.221 | 0.297  |
| C | 7.039  | 4.951 | -0.603 |
| C | 7.906  | 6.024 | -0.619 |
| C | 7.366  | 7.264 | -0.258 |
| C | 5.998  | 7.385 | 0.077  |
| C | 5.619  | 2.539 | -0.737 |
| C | 7.009  | 2.55  | -1.077 |
| C | 7.691  | 3.756 | -0.965 |
| C | 4.921  | 1.322 | -0.785 |
| C | 5.62   | 0.208 | -1.37  |
| C | 6.959  | 0.223 | -1.665 |
| C | 7.744  | 1.411 | -1.487 |
| C | 9.159  | 1.57  | -1.69  |
| C | 9.786  | 2.83  | -1.543 |
| C | 9.039  | 3.961 | -1.19  |
| C | 9.321  | 5.493 | -1.021 |
| C | 9.807  | 6.021 | -2.379 |
| C | 10.288 | 5.843 | 0.118  |
| C | 11.132 | 5.77  | -2.771 |
| C | 11.605 | 6.167 | -4.021 |
| C | 10.727 | 6.828 | -4.892 |
| C | 9.406  | 7.091 | -4.531 |
| C | 8.957  | 6.681 | -3.266 |
| C | 10.873 | 7.113 | 0.157  |
| C | 11.672 | 7.513 | 1.233  |
| C | 11.871 | 6.616 | 2.286  |
| C | 11.295 | 5.34  | 2.276  |
| C | 10.508 | 4.963 | 1.183  |
| C | 5.494  | 8.73  | 0.461  |

|   |         |         |        |
|---|---------|---------|--------|
| C | 10.005  | 0.385   | -1.992 |
| C | 9.721   | -0.471  | -3.066 |
| C | 10.477  | -1.623  | -3.295 |
| C | 11.555  | -1.9    | -2.448 |
| C | 11.886  | -1.048  | -1.389 |
| C | 11.105  | 0.091   | -1.172 |
| C | 4.779   | 8.926   | 1.653  |
| C | 4.336   | 10.196  | 2.033  |
| C | 4.616   | 11.283  | 1.197  |
| C | 5.329   | 11.123  | 0.004  |
| C | 5.764   | 9.843   | -0.35  |
| C | -6.683  | -10.923 | -4.12  |
| C | -2.912  | -11.05  | -0.751 |
| C | -9.472  | 1.135   | 6.314  |
| C | -13.114 | 1.072   | 2.806  |
| C | -13.046 | -1.394  | -0.507 |
| C | -10.117 | -2.471  | -4.469 |
| C | -5.587  | 12.308  | -0.625 |
| C | -3.629  | 10.323  | 3.593  |
| C | 5.793   | -12.147 | -0.36  |
| C | 3.915   | -9.787  | -4.419 |
| C | 9.45    | 1.267   | 6.281  |
| C | 13.117  | 1.145   | 2.8    |
| C | 5.589   | 12.302  | -0.905 |
| C | 3.608   | 10.399  | 3.341  |
| C | 10.117  | -2.575  | -4.411 |
| C | 13.041  | -1.389  | -0.476 |
| C | -13.025 | 5.989   | -4.307 |
| C | -8.441  | 7.894   | -5.288 |
| C | -12.337 | 8.853   | 1.421  |

|   |         |        |        |
|---|---------|--------|--------|
| C | -11.563 | 4.322  | 3.525  |
| C | 8.455   | 7.78   | -5.481 |
| C | 13.039  | 5.919  | -4.424 |
| C | 12.321  | 8.877  | 1.239  |
| C | 11.519  | 4.392  | 3.429  |
| C | 9.138   | -6.427 | 5.736  |
| C | 11.128  | -9.775 | 2.503  |
| C | 14.299  | -4.794 | -0.132 |
| C | 11.207  | -6.009 | -3.939 |
| C | -9.225  | -6.56  | 5.63   |
| C | -11.112 | -9.86  | 2.288  |
| C | -14.281 | -4.805 | -0.242 |
| C | -11.165 | -5.93  | -4.056 |
| H | -0.958  | -3.291 | -0.458 |
| H | -0.955  | 3.391  | 0.317  |
| H | 0.955   | -3.299 | -0.382 |
| H | 0.946   | 3.4    | 0.228  |
| H | -2.047  | -4.854 | -1.167 |
| H | -3.366  | -6.832 | -1.541 |
| H | -8.104  | -7.928 | -0.572 |
| H | -4.943  | 0.618  | 1.887  |
| H | -7.228  | 0.474  | 2.657  |
| H | -10.705 | -3.023 | 2.127  |
| H | -10.544 | -7.83  | 0.558  |
| H | -10.355 | -8.876 | 4.712  |
| H | -8.873  | -5.076 | 3.392  |
| H | -11.961 | -4.923 | 1.18   |
| H | -13.502 | -5.32  | -2.802 |
| H | -9.305  | -5.807 | -2.07  |
| H | -8.296  | -0.608 | 4.568  |

|   |         |        |        |
|---|---------|--------|--------|
| H | -11.869 | 1.691  | 5.158  |
| H | -11.381 | -0.647 | 1.593  |
| H | -3.99   | -8.649 | -0.031 |
| H | -4.49   | -11.88 | -2.809 |
| H | -7.212  | -8.562 | -2.862 |
| H | -5.079  | -0.675 | -1.553 |
| H | -7.429  | -0.644 | -2.031 |
| H | -10.861 | 2.925  | -1.656 |
| H | -1.941  | 5.084  | 0.589  |
| H | -3.202  | 7.125  | 0.711  |
| H | -8.001  | 8.147  | -0.007 |
| H | -10.713 | 7.811  | -0.496 |
| H | -12.517 | 6.855  | 3.276  |
| H | -10.078 | 3.951  | 1.268  |
| H | -7.927  | 6.929  | -2.81  |
| H | -11.065 | 7.245  | -5.715 |
| H | -11.806 | 5.307  | -1.962 |
| H | -6.309  | 9.712  | -1.052 |
| H | -4.282  | 12.235 | 1.767  |
| H | -4.612  | 8.021  | 2.507  |
| H | -8.901  | -0.144 | -3.727 |
| H | -12.144 | -2.746 | -2.675 |
| H | -11.338 | 0.745  | -0.312 |
| H | 2.01    | -4.936 | -0.895 |
| H | 3.335   | -6.915 | -1.232 |
| H | 8.129   | -7.907 | -0.467 |
| H | 4.943   | 0.669  | 1.854  |
| H | 7.229   | 0.546  | 2.622  |
| H | 10.708  | -2.96  | 2.177  |
| H | 11.968  | -4.88  | 1.277  |

|   |        |         |        |
|---|--------|---------|--------|
| H | 13.537 | -5.371  | -2.684 |
| H | 9.334  | -5.839  | -1.97  |
| H | 8.869  | -4.971  | 3.47   |
| H | 10.291 | -8.76   | 4.888  |
| H | 10.537 | -7.805  | 0.713  |
| H | 8.285  | -0.503  | 4.555  |
| H | 11.856 | 1.803   | 5.133  |
| H | 11.391 | -0.592  | 1.603  |
| H | 4.819  | -7.586  | -3.08  |
| H | 4.557  | -11.858 | -2.773 |
| H | 6.449  | -9.593  | 0.343  |
| H | 1.928  | 5.102   | 0.445  |
| H | 3.188  | 7.146   | 0.522  |
| H | 7.991  | 8.151   | -0.201 |
| H | 5.068  | -0.701  | -1.566 |
| H | 7.419  | -0.682  | -2.041 |
| H | 10.853 | 2.894   | -1.731 |
| H | 11.803 | 5.27    | -2.079 |
| H | 11.087 | 7.144   | -5.869 |
| H | 7.93   | 6.881   | -2.978 |
| H | 10.707 | 7.801   | -0.668 |
| H | 12.483 | 6.916   | 3.134  |
| H | 10.051 | 3.979   | 1.168  |
| H | 8.899  | -0.228  | -3.734 |
| H | 12.14  | -2.801  | -2.607 |
| H | 11.328 | 0.751   | -0.339 |
| H | 4.591  | 8.076   | 2.302  |
| H | 4.273  | 12.276  | 1.482  |
| H | 6.308  | 9.697   | -1.28  |
| H | -6.561 | -12.01  | -4.135 |

|   |         |         |        |
|---|---------|---------|--------|
| H | -7.753  | -10.701 | -4.076 |
| H | -6.311  | -10.538 | -5.077 |
| H | -2.251  | -10.354 | -0.226 |
| H | -2.323  | -11.57  | -1.513 |
| H | -3.238  | -11.804 | -0.023 |
| H | -8.668  | 0.5     | 6.698  |
| H | -9.064  | 2.147   | 6.197  |
| H | -10.256 | 1.189   | 7.076  |
| H | -13.723 | 1.497   | 3.61   |
| H | -12.979 | 1.854   | 2.049  |
| H | -13.686 | 0.262   | 2.341  |
| H | -13.875 | -1.826  | -1.075 |
| H | -12.738 | -2.148  | 0.228  |
| H | -13.424 | -0.525  | 0.039  |
| H | -9.5    | -1.965  | -5.217 |
| H | -9.551  | -3.335  | -4.099 |
| H | -11.008 | -2.863  | -4.969 |
| H | -6.51   | 12.19   | -1.202 |
| H | -5.666  | 13.231  | -0.043 |
| H | -4.77   | 12.445  | -1.344 |
| H | -2.87   | 11.109  | 3.53   |
| H | -3.135  | 9.398   | 3.907  |
| H | -4.326  | 10.608  | 4.391  |
| H | 5.901   | -13.007 | -1.027 |
| H | 6.7     | -12.073 | 0.249  |
| H | 4.961   | -12.364 | 0.321  |
| H | 3.429   | -8.838  | -4.665 |
| H | 3.155   | -10.574 | -4.447 |
| H | 4.635   | -10.002 | -5.218 |
| H | 10.229  | 1.334   | 7.047  |

|   |         |        |        |
|---|---------|--------|--------|
| H | 8.644   | 0.639  | 6.67   |
| H | 9.043   | 2.277  | 6.144  |
| H | 13.723  | 1.576  | 3.602  |
| H | 12.987  | 1.921  | 2.035  |
| H | 13.688  | 0.33   | 2.344  |
| H | 5.67    | 13.235 | -0.339 |
| H | 6.512   | 12.17  | -1.478 |
| H | 4.773   | 12.429 | -1.628 |
| H | 3.1     | 9.485  | 3.664  |
| H | 2.86    | 11.194 | 3.264  |
| H | 4.305   | 10.685 | 4.139  |
| H | 9.554   | -3.43  | -4.018 |
| H | 11.009  | -2.976 | -4.901 |
| H | 9.498   | -2.09  | -5.171 |
| H | 13.874  | -1.827 | -1.035 |
| H | 13.412  | -0.506 | 0.053  |
| H | 12.737  | -2.13  | 0.273  |
| H | -13.6   | 6.923  | -4.325 |
| H | -13.074 | 5.562  | -5.315 |
| H | -13.532 | 5.301  | -3.625 |
| H | -8.932  | 8.203  | -6.215 |
| H | -7.589  | 7.258  | -5.555 |
| H | -8.031  | 8.791  | -4.808 |
| H | -12.568 | 9.167  | 2.444  |
| H | -13.278 | 8.855  | 0.857  |
| H | -11.689 | 9.611  | 0.971  |
| H | -10.945 | 3.428  | 3.423  |
| H | -12.609 | 3.996  | 3.559  |
| H | -11.338 | 4.78   | 4.495  |
| H | 8.99    | 8.276  | -6.297 |

|   |         |         |        |
|---|---------|---------|--------|
| H | 7.759   | 7.062   | -5.931 |
| H | 7.85    | 8.532   | -4.964 |
| H | 13.521  | 5.19    | -3.766 |
| H | 13.105  | 5.543   | -5.45  |
| H | 13.628  | 6.843   | -4.38  |
| H | 13.27   | 8.863   | 0.688  |
| H | 12.538  | 9.214   | 2.257  |
| H | 11.681  | 9.626   | 0.762  |
| H | 12.567  | 4.075   | 3.488  |
| H | 10.91   | 3.491   | 3.334  |
| H | 11.273  | 4.866   | 4.386  |
| H | 9.475   | -7.159  | 6.475  |
| H | 8.049   | -6.34   | 5.824  |
| H | 9.56    | -5.453  | 6.009  |
| H | 11.074  | -10.046 | 1.445  |
| H | 10.649  | -10.571 | 3.083  |
| H | 12.188  | -9.762  | 2.786  |
| H | 14.277  | -4.217  | 0.797  |
| H | 14.893  | -4.236  | -0.862 |
| H | 14.832  | -5.73   | 0.075  |
| H | 11.849  | -5.414  | -4.597 |
| H | 10.17   | -5.856  | -4.251 |
| H | 11.451  | -7.064  | -4.116 |
| H | -9.937  | -5.828  | 6.03   |
| H | -8.231  | -6.106  | 5.686  |
| H | -9.239  | -7.43   | 6.293  |
| H | -11.845 | -10.152 | 3.047  |
| H | -10.341 | -10.639 | 2.266  |
| H | -11.611 | -9.864  | 1.315  |
| H | -14.875 | -4.24   | -0.967 |

|   |         |        |        |
|---|---------|--------|--------|
| H | -14.267 | -4.24  | 0.695  |
| H | -14.811 | -5.746 | -0.05  |
| H | -11.794 | -5.313 | -4.705 |
| H | -10.124 | -5.779 | -4.355 |
| H | -11.417 | -6.978 | -4.261 |

---

**1b:**

| $(P[5], M[6])$ - <b>1b</b> in the ground state |        |        |        | $(P[5], M[6])$ - <b>1b</b> in the first excited state |        |        |        |
|------------------------------------------------|--------|--------|--------|-------------------------------------------------------|--------|--------|--------|
| C                                              | 1.59   | 1.147  | 0.688  | C                                                     | 1.597  | 1.158  | 0.7    |
| C                                              | 0.245  | 1.406  | 0.362  | C                                                     | 0.263  | 1.415  | 0.407  |
| C                                              | -0.622 | 0.434  | -0.081 | C                                                     | -0.636 | 0.426  | -0.003 |
| C                                              | -0.166 | -0.917 | -0.128 | C                                                     | -0.189 | -0.931 | -0.031 |
| C                                              | 1.225  | -1.194 | -0.022 | C                                                     | 1.21   | -1.208 | 0.051  |
| C                                              | 2.097  | -0.187 | 0.57   | C                                                     | 2.097  | -0.196 | 0.6    |
| C                                              | -1.125 | -1.979 | -0.229 | C                                                     | -1.149 | -1.987 | -0.132 |
| C                                              | -0.658 | -3.277 | -0.29  | C                                                     | -0.677 | -3.304 | -0.161 |
| C                                              | -4.925 | -2.278 | 0.154  | C                                                     | -4.934 | -2.302 | 0.14   |
| C                                              | 1.655  | -2.494 | -0.502 | C                                                     | 1.628  | -2.513 | -0.418 |
| C                                              | -2     | 0.752  | -0.468 | C                                                     | -1.989 | 0.743  | -0.373 |
| C                                              | -2.966 | -0.268 | -0.337 | C                                                     | -2.965 | -0.285 | -0.265 |
| C                                              | -2.557 | -1.636 | -0.136 | C                                                     | -2.564 | -1.647 | -0.09  |
| C                                              | -2.399 | 2.071  | -0.826 | C                                                     | -2.391 | 2.084  | -0.713 |
| C                                              | -3.756 | 2.443  | -0.528 | C                                                     | -3.734 | 2.458  | -0.366 |
| C                                              | -4.687 | 1.43   | -0.279 | C                                                     | -4.664 | 1.44   | -0.126 |
| C                                              | -4.361 | 0.066  | -0.341 | C                                                     | -4.355 | 0.066  | -0.247 |
| C                                              | -5.362 | -0.983 | -0.249 | C                                                     | -5.36  | -0.967 | -0.211 |
| C                                              | 0.719  | -3.574 | -0.445 | C                                                     | 0.686  | -3.598 | -0.312 |
| C                                              | -3.528 | -2.564 | 0.165  | C                                                     | -3.563 | -2.598 | 0.163  |
| C                                              | 4.96   | 6.856  | 1.935  | C                                                     | 5.043  | 6.861  | 1.81   |
| C                                              | 8.254  | 2.87   | 2.708  | C                                                     | 8.312  | 2.861  | 2.585  |

|   |        |        |        |   |        |        |        |
|---|--------|--------|--------|---|--------|--------|--------|
| C | 7.796  | 1.394  | 2.369  | C | 7.838  | 1.384  | 2.272  |
| C | 8.382  | 0.116  | 2.364  | C | 8.416  | 0.104  | 2.27   |
| C | 7.595  | -1.037 | 2.142  | C | 7.615  | -1.048 | 2.078  |
| C | 6.182  | -0.943 | 1.893  | C | 6.2    | -0.948 | 1.857  |
| C | 5.248  | -2.019 | 1.729  | C | 5.256  | -2.021 | 1.727  |
| C | 3.936  | -1.777 | 1.412  | C | 3.94   | -1.776 | 1.435  |
| C | 3.411  | -0.467 | 1.129  | C | 3.413  | -0.468 | 1.143  |
| C | 6.443  | 1.437  | 2.086  | C | 6.478  | 1.433  | 2.014  |
| C | 5.615  | 0.351  | 1.816  | C | 5.637  | 0.349  | 1.774  |
| C | 4.253  | 0.614  | 1.455  | C | 4.272  | 0.616  | 1.438  |
| C | 5.265  | 5.404  | 2.034  | C | 5.335  | 5.409  | 1.928  |
| C | 6.578  | 5.02   | 2.388  | C | 6.649  | 5.018  | 2.266  |
| C | 6.935  | 3.664  | 2.436  | C | 6.995  | 3.66   | 2.327  |
| C | 5.952  | 2.759  | 2.096  | C | 5.999  | 2.758  | 2.016  |
| C | 2.88   | 4.668  | 1.423  | C | 2.936  | 4.682  | 1.363  |
| C | 4.256  | 4.425  | 1.738  | C | 4.31   | 4.432  | 1.661  |
| C | 4.64   | 3.062  | 1.756  | C | 4.683  | 3.066  | 1.693  |
| C | 3.773  | 1.977  | 1.422  | C | 3.802  | 1.983  | 1.39   |
| C | 2.44   | 2.252  | 1.093  | C | 2.469  | 2.267  | 1.073  |
| C | 2.026  | 3.63   | 1.125  | C | 2.069  | 3.644  | 1.088  |
| C | -6.092 | 8.711  | 0.496  | C | -5.98  | 8.745  | 0.723  |
| C | -1.188 | 9.105  | -1.336 | C | -1.148 | 9.101  | -1.292 |
| C | -2.544 | 8.492  | -0.817 | C | -2.494 | 8.503  | -0.733 |
| C | -3.753 | 8.989  | -0.305 | C | -3.67  | 9.008  | -0.171 |
| C | -4.816 | 8.117  | 0.017  | C | -4.73  | 8.14   | 0.196  |
| C | -4.68  | 6.689  | -0.121 | C | -4.611 | 6.712  | 0.057  |
| C | -5.634 | 5.684  | 0.238  | C | -5.547 | 5.713  | 0.479  |
| C | -5.36  | 4.344  | 0.068  | C | -5.287 | 4.369  | 0.31   |
| C | -4.111 | 3.856  | -0.439 | C | -4.077 | 3.869  | -0.265 |
| C | -2.474 | 7.123  | -0.98  | C | -2.444 | 7.127  | -0.905 |

|   |         |        |        |   |         |        |        |
|---|---------|--------|--------|---|---------|--------|--------|
| C | -3.455  | 6.198  | -0.634 | C | -3.417  | 6.211  | -0.516 |
| C | -3.148  | 4.812  | -0.793 | C | -3.125  | 4.823  | -0.684 |
| C | 1.3     | 6.2    | -2.418 | C | 1.277   | 6.16   | -2.428 |
| C | 0.874   | 7.535  | -2.221 | C | 0.869   | 7.508  | -2.226 |
| C | -0.427  | 7.816  | -1.789 | C | -0.414  | 7.804  | -1.766 |
| C | -1.24   | 6.73   | -1.538 | C | -1.236  | 6.724  | -1.497 |
| C | 0.63    | 3.709  | -2.478 | C | 0.592   | 3.675  | -2.457 |
| C | 0.395   | 5.099  | -2.212 | C | 0.371   | 5.073  | -2.199 |
| C | -0.899  | 5.395  | -1.716 | C | -0.912  | 5.382  | -1.677 |
| C | -1.857  | 4.409  | -1.319 | C | -1.868  | 4.413  | -1.254 |
| C | -1.504  | 3.059  | -1.407 | C | -1.523  | 3.042  | -1.332 |
| C | -0.282  | 2.752  | -2.105 | C | -0.311  | 2.726  | -2.051 |
| C | -8.721  | -7.499 | 2.203  | C | -8.845  | -7.533 | 1.97   |
| C | -11.671 | 1.133  | -1.366 | C | -11.626 | 1.275  | -1.294 |
| C | -11.947 | -3.678 | 0.682  | C | -11.991 | -3.604 | 0.564  |
| C | -10.635 | -4.454 | 1.036  | C | -10.695 | -4.415 | 0.896  |
| C | -10.324 | -5.722 | 1.539  | C | -10.411 | -5.707 | 1.356  |
| C | -8.977  | -6.13  | 1.685  | C | -9.074  | -6.142 | 1.497  |
| C | -7.89   | -5.254 | 1.336  | C | -7.967  | -5.271 | 1.189  |
| C | -6.485  | -5.506 | 1.476  | C | -6.572  | -5.551 | 1.334  |
| C | -5.55   | -4.577 | 1.086  | C | -5.617  | -4.619 | 0.987  |
| C | -5.889  | -3.293 | 0.532  | C | -5.929  | -3.315 | 0.479  |
| C | -9.563  | -3.653 | 0.692  | C | -9.608  | -3.621 | 0.589  |
| C | -8.218  | -3.977 | 0.819  | C | -8.268  | -3.97  | 0.715  |
| C | -7.258  | -2.994 | 0.417  | C | -7.289  | -2.99  | 0.36   |
| C | -11.052 | -0.123 | -0.866 | C | -11.029 | -0.008 | -0.839 |
| C | -11.904 | -1.158 | -0.41  | C | -11.901 | -1.046 | -0.429 |
| C | -11.368 | -2.349 | 0.091  | C | -11.386 | -2.264 | 0.028  |
| C | -9.99   | -2.428 | 0.147  | C | -10.01  | -2.368 | 0.088  |
| C | -8.644  | 0.622  | -1.386 | C | -8.607  | 0.722  | -1.311 |

|   |         |         |        |   |         |        |        |
|---|---------|---------|--------|---|---------|--------|--------|
| C | -9.623  | -0.269  | -0.835 | C | -9.603  | -0.176 | -0.805 |
| C | -9.091  | -1.456  | -0.276 | C | -9.092  | -1.395 | -0.291 |
| C | -7.695  | -1.731  | -0.127 | C | -7.704  | -1.695 | -0.14  |
| C | -6.762  | -0.75   | -0.521 | C | -6.753  | -0.712 | -0.484 |
| C | -7.3    | 0.382   | -1.239 | C | -7.268  | 0.455  | -1.161 |
| C | 2.154   | -10.198 | -0.499 | C | 2.148   | -10.22 | -0.205 |
| C | 6.54    | -7.592  | -1.652 | C | 6.482   | -7.641 | -1.584 |
| C | 5.06    | -7.889  | -1.232 | C | 5.018   | -7.928 | -1.111 |
| C | 4.292   | -9.037  | -1     | C | 4.26    | -9.071 | -0.821 |
| C | 2.911   | -8.936  | -0.71  | C | 2.892   | -8.964 | -0.483 |
| C | 2.256   | -7.656  | -0.632 | C | 2.236   | -7.683 | -0.417 |
| C | 0.884   | -7.392  | -0.307 | C | 0.881   | -7.412 | -0.041 |
| C | 0.39    | -6.107  | -0.28  | C | 0.385   | -6.124 | -0.032 |
| C | 1.192   | -4.945  | -0.547 | C | 1.17    | -4.974 | -0.372 |
| C | 4.39    | -6.683  | -1.168 | C | 4.347   | -6.722 | -1.059 |
| C | 3.043   | -6.505  | -0.877 | C | 3.01    | -6.536 | -0.725 |
| C | 2.546   | -5.165  | -0.844 | C | 2.511   | -5.197 | -0.713 |
| C | 7.043   | -3.679  | -2.193 | C | 6.969   | -3.739 | -2.217 |
| C | 7.437   | -5.037  | -2.123 | C | 7.365   | -5.097 | -2.133 |
| C | 6.515   | -6.034  | -1.785 | C | 6.452   | -6.085 | -1.751 |
| C | 5.236   | -5.604  | -1.493 | C | 5.18    | -5.65  | -1.435 |
| C | 5.121   | -1.963  | -2.005 | C | 5.052   | -2.018 | -2.015 |
| C | 5.692   | -3.277  | -1.905 | C | 5.626   | -3.332 | -1.906 |
| C | 4.78    | -4.291  | -1.523 | C | 4.722   | -4.338 | -1.481 |
| C | 3.419   | -4.058  | -1.157 | C | 3.372   | -4.096 | -1.086 |
| C | 2.962   | -2.734  | -1.075 | C | 2.913   | -2.768 | -1.02  |
| C | 3.834   | -1.714  | -1.593 | C | 3.777   | -1.761 | -1.577 |
| C | -11.227 | 2.385   | -0.914 | C | -11.167 | 2.503  | -0.793 |
| C | -11.811 | 3.572   | -1.368 | C | -11.731 | 3.715  | -1.204 |
| C | -12.861 | 3.492   | -2.289 | C | -12.777 | 3.686  | -2.133 |

|   |         |         |        |   |         |         |        |
|---|---------|---------|--------|---|---------|---------|--------|
| C | -13.333 | 2.259   | -2.755 | C | -13.264 | 2.478   | -2.648 |
| C | -12.731 | 1.09    | -2.285 | C | -12.682 | 1.283   | -2.219 |
| C | -14.441 | 2.197   | -3.781 | C | -14.367 | 2.472   | -3.681 |
| C | -11.338 | 4.909   | -0.843 | C | -11.241 | 5.023   | -0.627 |
| C | -9.351  | -7.939  | 3.376  | C | -9.497  | -8.004  | 3.118  |
| C | -9.149  | -9.232  | 3.869  | C | -9.321  | -9.316  | 3.569  |
| C | -8.305  | -10.094 | 3.162  | C | -8.478  | -10.165 | 2.844  |
| C | -7.667  | -9.69   | 1.983  | C | -7.818  | -9.73   | 1.689  |
| C | -7.882  | -8.392  | 1.516  | C | -8.008  | -8.413  | 1.264  |
| C | -9.798  | -9.672  | 5.161  | C | -9.993  | -9.79   | 4.836  |
| C | -6.797  | -10.655 | 1.211  | C | -6.95   | -10.681 | 0.897  |
| C | -12.729 | -4.515  | -0.341 | C | -12.781 | -4.388  | -0.495 |
| C | -13.495 | -5.601  | 0.109  | C | -13.573 | -5.473  | -0.091 |
| C | -14.168 | -6.433  | -0.786 | C | -14.254 | -6.258  | -1.022 |
| C | -14.072 | -6.16   | -2.158 | C | -14.138 | -5.939  | -2.382 |
| C | -13.316 | -5.089  | -2.635 | C | -13.354 | -4.867  | -2.813 |
| C | -12.647 | -4.271  | -1.713 | C | -12.678 | -4.097  | -1.855 |
| C | -14.968 | -7.616  | -0.292 | C | -15.082 | -7.441  | -0.578 |
| C | -13.194 | -4.816  | -4.116 | C | -13.213 | -4.543  | -4.281 |
| C | -12.798 | -3.318  | 1.908  | C | -12.844 | -3.277  | 1.799  |
| C | -12.282 | -3.37   | 3.203  | C | -12.34  | -3.395  | 3.095  |
| C | -13.051 | -2.971  | 4.306  | C | -13.11  | -3.028  | 4.207  |
| C | -14.353 | -2.518  | 4.088  | C | -14.401 | -2.538  | 3.999  |
| C | -14.896 | -2.449  | 2.797  | C | -14.931 | -2.404  | 2.709  |
| C | -14.109 | -2.855  | 1.719  | C | -14.143 | -2.78   | 1.62   |
| C | -12.462 | -3.018  | 5.696  | C | -12.535 | -3.148  | 5.599  |
| C | -16.297 | -1.927  | 2.581  | C | -16.319 | -1.844  | 2.502  |
| C | 0.976   | -10.468 | -1.213 | C | 0.937   | -10.508 | -0.855 |
| C | 0.28    | -11.668 | -1.038 | C | 0.251   | -11.703 | -0.616 |
| C | 0.78    | -12.607 | -0.13  | C | 0.795   | -12.619 | 0.292  |

|   |        |         |        |   |        |         |        |
|---|--------|---------|--------|---|--------|---------|--------|
| C | 1.954  | -12.372 | 0.596  | C | 2.002  | -12.366 | 0.952  |
| C | 2.631  | -11.165 | 0.399  | C | 2.668  | -11.165 | 0.692  |
| C | -0.96  | -11.961 | -1.849 | C | -1.027 | -12.017 | -1.358 |
| C | 2.454  | -13.383 | 1.6    | C | 2.554  | -13.35  | 1.957  |
| C | -6.094 | 9.663   | 1.526  | C | -5.932 | 9.719   | 1.733  |
| C | -7.283 | 10.248  | 1.973  | C | -7.098 | 10.314  | 2.222  |
| C | -8.487 | 9.866   | 1.37   | C | -8.33  | 9.923   | 1.683  |
| C | -8.521 | 8.92    | 0.339  | C | -8.413 | 8.958   | 0.672  |
| C | -7.317 | 8.358   | -0.093 | C | -7.231 | 8.384   | 0.197  |
| C | -7.271 | 11.244  | 3.109  | C | -7.035 | 11.331  | 3.338  |
| C | -9.833 | 8.497   | -0.281 | C | -9.752 | 8.53    | 0.119  |
| C | 4.473  | 7.399   | 0.735  | C | 4.541  | 7.392   | 0.61   |
| C | 4.252  | 8.773   | 0.604  | C | 4.336  | 8.766   | 0.461  |
| C | 4.517  | 9.602   | 1.7    | C | 4.629  | 9.609   | 1.54   |
| C | 4.983  | 9.089   | 2.915  | C | 5.107  | 9.108   | 2.755  |
| C | 5.21   | 7.712   | 3.016  | C | 5.32   | 7.731   | 2.874  |
| C | 5.195  | 9.998   | 4.102  | C | 5.348  | 10.033  | 3.925  |
| C | 3.716  | 9.35    | -0.682 | C | 3.79   | 9.332   | -0.826 |
| C | 7.585  | -8.003  | -0.604 | C | 7.561  | -8.033  | -0.564 |
| C | 7.233  | -8.453  | 0.668  | C | 7.25   | -8.468  | 0.724  |
| C | 8.212  | -8.832  | 1.6    | C | 8.258  | -8.84   | 1.627  |
| C | 9.557  | -8.728  | 1.242  | C | 9.591  | -8.743  | 1.224  |
| C | 9.941  | -8.263  | -0.025 | C | 9.934  | -8.292  | -0.059 |
| C | 8.945  | -7.913  | -0.937 | C | 8.91   | -7.951  | -0.942 |
| C | 7.807  | -9.387  | 2.945  | C | 7.895  | -9.383  | 2.989  |
| C | 11.403 | -8.126  | -0.378 | C | 11.384 | -8.159  | -0.461 |
| C | 6.794  | -8.304  | -2.993 | C | 6.693  | -8.38   | -2.919 |
| C | 7.085  | -9.676  | -2.992 | C | 6.979  | -9.754  | -2.899 |
| C | 7.258  | -10.381 | -4.183 | C | 7.113  | -10.483 | -4.08  |
| C | 7.141  | -9.687  | -5.396 | C | 6.963  | -9.813  | -5.303 |

|   |        |         |        |   |        |         |        |
|---|--------|---------|--------|---|--------|---------|--------|
| C | 6.85   | -8.323  | -5.428 | C | 6.677  | -8.448  | -5.353 |
| C | 6.678  | -7.64   | -4.214 | C | 6.543  | -7.741  | -4.149 |
| C | 7.554  | -11.862 | -4.176 | C | 7.403  | -11.965 | -4.052 |
| C | 6.701  | -7.583  | -6.737 | C | 6.492  | -7.734  | -6.672 |
| C | 8.081  | -2.682  | -2.553 | C | 8      | -2.75   | -2.612 |
| C | 8.99   | -2.943  | -3.594 | C | 8.888  | -3.025  | -3.666 |
| C | 10.022 | -2.055  | -3.899 | C | 9.917  | -2.143  | -4.002 |
| C | 10.14  | -0.879  | -3.147 | C | 10.053 | -0.959  | -3.266 |
| C | 9.244  | -0.582  | -2.115 | C | 9.178  | -0.648  | -2.221 |
| C | 8.222  | -1.492  | -1.827 | C | 8.159  | -1.551  | -1.904 |
| C | 10.976 | -2.337  | -5.037 | C | 10.848 | -2.442  | -5.154 |
| C | 9.352  | 0.695   | -1.325 | C | 9.305  | 0.638   | -1.447 |
| C | 8.24   | -2.379  | 2.075  | C | 8.252  | -2.393  | 2.016  |
| C | 9.203  | -2.641  | 1.093  | C | 9.192  | -2.671  | 1.016  |
| C | 9.682  | -3.937  | 0.873  | C | 9.663  | -3.972  | 0.804  |
| C | 9.214  | -4.972  | 1.686  | C | 9.209  | -4.994  | 1.643  |
| C | 8.297  | -4.731  | 2.717  | C | 8.315  | -4.736  | 2.689  |
| C | 7.821  | -3.431  | 2.904  | C | 7.846  | -3.432  | 2.867  |
| C | 10.665 | -4.212  | -0.242 | C | 10.618 | -4.267  | -0.328 |
| C | 7.782  | -5.871  | 3.564  | C | 7.814  | -5.862  | 3.561  |
| C | 9.336  | 3.435   | 1.766  | C | 9.381  | 3.407   | 1.618  |
| C | 9.064  | 3.47    | 0.389  | C | 9.084  | 3.43    | 0.245  |
| C | 9.94   | 4.074   | -0.512 | C | 9.947  | 4.019   | -0.678 |
| C | 11.126 | 4.638   | -0.019 | C | 11.146 | 4.579   | -0.212 |
| C | 11.426 | 4.617   | 1.342  | C | 11.471 | 4.569   | 1.143  |
| C | 10.513 | 4.023   | 2.228  | C | 10.57  | 3.991   | 2.052  |
| C | 9.63   | 4.135   | -1.99  | C | 9.61   | 4.067   | -2.15  |
| C | 12.706 | 5.219   | 1.872  | C | 12.765 | 5.166   | 1.644  |
| C | 8.656  | 2.888   | 4.193  | C | 8.74   | 2.893   | 4.062  |
| C | 9.754  | 2.12    | 4.618  | C | 9.84   | 2.123   | 4.477  |

|   |        |        |        |   |        |        |        |
|---|--------|--------|--------|---|--------|--------|--------|
| C | 10.141 | 2.076  | 5.955  | C | 10.249 | 2.092  | 5.809  |
| C | 9.407  | 2.82   | 6.891  | C | 9.536  | 2.852  | 6.748  |
| C | 8.312  | 3.59   | 6.504  | C | 8.439  | 3.624  | 6.37   |
| C | 7.948  | 3.616  | 5.148  | C | 8.053  | 3.637  | 5.02   |
| C | 11.312 | 1.231  | 6.4    | C | 11.422 | 1.245  | 6.243  |
| C | 7.506  | 4.373  | 7.513  | C | 7.656  | 4.425  | 7.383  |
| C | 3.407  | 6.777  | -3.669 | C | 3.356  | 6.723  | -3.729 |
| C | 2.732  | 5.968  | -2.741 | C | 2.699  | 5.919  | -2.784 |
| C | 3.467  | 4.983  | -2.058 | C | 3.445  | 4.932  | -2.115 |
| C | 4.835  | 4.803  | -2.284 | C | 4.806  | 4.746  | -2.371 |
| C | 5.476  | 5.634  | -3.211 | C | 5.429  | 5.57   | -3.315 |
| C | 4.777  | 6.626  | -3.907 | C | 4.719  | 6.563  | -3.999 |
| C | 5.494  | 7.536  | -4.877 | C | 5.418  | 7.466  | -4.988 |
| C | 5.61   | 3.761  | -1.513 | C | 5.593  | 3.705  | -1.611 |
| C | -1.498 | 10.658 | -4.852 | C | -1.537 | 10.66  | -4.797 |
| C | -1.155 | 9.787  | -3.806 | C | -1.174 | 9.785  | -3.761 |
| C | -1.503 | 10.069 | -2.486 | C | -1.486 | 10.069 | -2.433 |
| C | -2.21  | 11.254 | -2.217 | C | -2.176 | 11.259 | -2.145 |
| C | -2.564 | 12.138 | -3.235 | C | -2.548 | 12.147 | -3.152 |
| C | -2.199 | 11.825 | -4.553 | C | -2.219 | 11.833 | -4.479 |
| C | 1.11   | 11.461 | 0.704  | C | 1.224  | 11.434 | 0.688  |
| C | 0.271  | 10.973 | -0.312 | C | 0.355  | 10.954 | -0.307 |
| C | -0.347 | 9.728  | -0.199 | C | -0.272 | 9.716  | -0.177 |
| C | -0.093 | 8.951  | 0.944  | C | 0.003  | 8.936  | 0.959  |
| C | 0.76   | 9.396  | 1.952  | C | 0.884  | 9.373  | 1.945  |
| C | 1.337  | 10.669 | 1.827  | C | 1.471  | 10.64  | 1.805  |
| C | -1.123 | 10.31  | -6.273 | C | -1.2   | 10.312 | -6.228 |
| C | -3.342 | 13.398 | -2.935 | C | -3.307 | 13.413 | -2.831 |
| C | 1.8    | 12.794 | 0.538  | C | 1.923  | 12.759 | 0.504  |
| C | 1.118  | 8.515  | 3.124  | C | 1.263  | 8.49   | 3.109  |

|   |         |         |        |   |         |         |        |
|---|---------|---------|--------|---|---------|---------|--------|
| H | -0.13   | 2.408   | 0.482  | H | -0.116  | 2.416   | 0.536  |
| H | -1.366  | -4.096  | -0.307 | H | -1.386  | -4.121  | -0.159 |
| H | -5.696  | 1.704   | -0.015 | H | -5.671  | 1.712   | 0.154  |
| H | -3.222  | -3.575  | 0.395  | H | -3.26   | -3.608  | 0.4    |
| H | 9.443   | -0.028  | 2.541  | H | 9.479   | -0.046  | 2.427  |
| H | 5.572   | -3.043  | 1.863  | H | 5.577   | -3.045  | 1.867  |
| H | 3.268   | -2.623  | 1.355  | H | 3.266   | -2.62   | 1.4    |
| H | 7.308   | 5.799   | 2.583  | H | 7.389   | 5.794   | 2.437  |
| H | 2.504   | 5.685   | 1.401  | H | 2.566   | 5.701   | 1.331  |
| H | 1.005   | 3.888   | 0.873  | H | 1.048   | 3.906   | 0.838  |
| H | -3.92   | 10.054  | -0.183 | H | -3.823  | 10.073  | -0.039 |
| H | -6.583  | 5.975   | 0.674  | H | -6.467  | 6.013   | 0.967  |
| H | -6.118  | 3.633   | 0.376  | H | -6.025  | 3.663   | 0.675  |
| H | 1.595   | 8.333   | -2.355 | H | 1.597   | 8.296   | -2.378 |
| H | 1.535   | 3.406   | -2.992 | H | 1.482   | 3.364   | -2.991 |
| H | -0.066  | 1.715   | -2.331 | H | -0.106  | 1.685   | -2.272 |
| H | -11.106 | -6.431  | 1.793  | H | -11.208 | -6.41   | 1.576  |
| H | -6.15   | -6.44   | 1.914  | H | -6.253  | -6.504  | 1.741  |
| H | -4.506  | -4.824  | 1.241  | H | -4.578  | -4.889  | 1.141  |
| H | -12.976 | -0.992  | -0.432 | H | -12.97  | -0.862  | -0.451 |
| H | -8.965  | 1.482   | -1.963 | H | -8.911  | 1.609   | -1.855 |
| H | -6.61   | 1.053   | -1.734 | H | -6.563  | 1.136   | -1.621 |
| H | 4.729   | -10.028 | -1.075 | H | 4.697   | -10.062 | -0.886 |
| H | 0.224   | -8.215  | -0.057 | H | 0.234   | -8.227  | 0.265  |
| H | -0.65   | -5.975  | -0.002 | H | -0.64   | -5.982  | 0.292  |
| H | 8.476   | -5.278  | -2.318 | H | 8.399   | -5.341  | -2.35  |
| H | 5.71    | -1.149  | -2.41  | H | 5.632   | -1.213  | -2.45  |
| H | 3.452   | -0.703  | -1.663 | H | 3.394   | -0.75   | -1.656 |
| H | -10.426 | 2.429   | -0.182 | H | -10.369 | 2.508   | -0.056 |
| H | -13.321 | 4.409   | -2.651 | H | -13.221 | 4.622   | -2.464 |

|   |         |         |        |   |         |         |        |
|---|---------|---------|--------|---|---------|---------|--------|
| H | -13.072 | 0.125   | -2.652 | H | -13.035 | 0.338   | -2.624 |
| H | -14.04  | 2.281   | -4.798 | H | -13.961 | 2.597   | -4.692 |
| H | -14.989 | 1.252   | -3.722 | H | -14.924 | 1.531   | -3.667 |
| H | -15.158 | 3.014   | -3.646 | H | -15.077 | 3.289   | -3.514 |
| H | -10.262 | 4.903   | -0.642 | H | -10.166 | 4.994   | -0.422 |
| H | -11.545 | 5.715   | -1.552 | H | -11.432 | 5.859   | -1.306 |
| H | -11.842 | 5.164   | 0.098  | H | -11.746 | 5.251   | 0.321  |
| H | -9.993  | -7.251  | 3.919  | H | -10.137 | -7.325  | 3.676  |
| H | -8.14   | -11.103 | 3.536  | H | -8.333  | -11.188 | 3.186  |
| H | -7.413  | -8.07   | 0.59   | H | -7.522  | -8.067  | 0.356  |
| H | -10.765 | -9.183  | 5.31   | H | -10.957 | -9.294  | 4.987  |
| H | -9.957  | -10.754 | 5.182  | H | -10.166 | -10.87  | 4.819  |
| H | -9.169  | -9.418  | 6.023  | H | -9.374  | -9.572  | 5.715  |
| H | -6.222  | -11.3   | 1.883  | H | -6.373  | -11.338 | 1.556  |
| H | -7.405  | -11.311 | 0.575  | H | -7.559  | -11.324 | 0.25   |
| H | -6.094  | -10.129 | 0.56   | H | -6.247  | -10.142 | 0.255  |
| H | -13.579 | -5.784  | 1.176  | H | -13.672 | -5.693  | 0.968  |
| H | -14.604 | -6.795  | -2.864 | H | -14.675 | -6.536  | -3.116 |
| H | -12.06  | -3.433  | -2.075 | H | -12.071 | -3.259  | -2.181 |
| H | -15.242 | -7.504  | 0.761  | H | -15.395 | -7.343  | 0.466  |
| H | -15.888 | -7.746  | -0.871 | H | -15.981 | -7.554  | -1.193 |
| H | -14.392 | -8.545  | -0.385 | H | -14.512 | -8.374  | -0.664 |
| H | -13.217 | -3.742  | -4.327 | H | -13.228 | -3.462  | -4.455 |
| H | -12.246 | -5.201  | -4.509 | H | -12.26  | -4.918  | -4.676 |
| H | -14.002 | -5.291  | -4.68  | H | -14.015 | -4.994  | -4.873 |
| H | -11.27  | -3.728  | 3.364  | H | -11.337 | -3.781  | 3.248  |
| H | -14.962 | -2.216  | 4.938  | H | -15.011 | -2.26   | 4.856  |
| H | -14.523 | -2.83   | 0.715  | H | -14.549 | -2.704  | 0.615  |
| H | -11.782 | -2.174  | 5.863  | H | -11.825 | -2.337  | 5.801  |
| H | -13.239 | -2.971  | 6.465  | H | -13.315 | -3.101  | 6.364  |

|   |         |         |        |   |         |         |        |
|---|---------|---------|--------|---|---------|---------|--------|
| H | -11.882 | -3.934  | 5.853  | H | -11.99  | -4.089  | 5.725  |
| H | -16.315 | -0.83   | 2.598  | H | -16.308 | -0.747  | 2.531  |
| H | -16.699 | -2.247  | 1.615  | H | -16.732 | -2.142  | 1.534  |
| H | -16.979 | -2.274  | 3.364  | H | -17.007 | -2.18   | 3.284  |
| H | 0.615   | -9.738  | -1.932 | H | 0.54    | -9.798  | -1.574 |
| H | 0.244   | -13.543 | 0.015  | H | 0.267   | -13.551 | 0.486  |
| H | 3.536   | -10.958 | 0.964  | H | 3.599   | -10.944 | 1.207  |
| H | -1.496  | -11.043 | -2.109 | H | -1.566  | -11.105 | -1.631 |
| H | -0.706  | -12.466 | -2.789 | H | -0.819  | -12.563 | -2.287 |
| H | -1.649  | -12.614 | -1.305 | H | -1.696  | -12.641 | -0.757 |
| H | 2.237   | -14.407 | 1.28   | H | 2.258   | -14.376 | 1.718  |
| H | 3.534   | -13.297 | 1.752  | H | 3.647   | -13.312 | 1.996  |
| H | 1.974   | -13.239 | 2.576  | H | 2.185   | -13.131 | 2.967  |
| H | -5.152  | 9.936   | 1.994  | H | -4.97   | 9.999   | 2.151  |
| H | -9.418  | 10.317  | 1.71   | H | -9.243  | 10.383  | 2.055  |
| H | -7.322  | 7.649   | -0.916 | H | -7.276  | 7.661   | -0.612 |
| H | -6.325  | 11.792  | 3.151  | H | -6.069  | 11.843  | 3.36   |
| H | -8.082  | 11.972  | 3.013  | H | -7.819  | 12.088  | 3.234  |
| H | -7.399  | 10.74   | 4.075  | H | -7.174  | 10.852  | 4.315  |
| H | -10.561 | 9.314   | -0.279 | H | -10.474 | 9.353   | 0.128  |
| H | -9.699  | 8.163   | -1.314 | H | -9.664  | 8.167   | -0.909 |
| H | -10.279 | 7.662   | 0.275  | H | -10.181 | 7.714   | 0.715  |
| H | 4.296   | 6.745   | -0.113 | H | 4.343   | 6.726   | -0.225 |
| H | 4.352   | 10.673  | 1.604  | H | 4.475   | 10.679  | 1.429  |
| H | 5.579   | 7.292   | 3.949  | H | 5.7     | 7.32    | 3.806  |
| H | 5.537   | 10.991  | 3.791  | H | 5.685   | 11.02   | 3.594  |
| H | 4.261   | 10.136  | 4.661  | H | 4.426   | 10.18   | 4.502  |
| H | 5.933   | 9.587   | 4.798  | H | 6.099   | 9.629   | 4.611  |
| H | 2.632   | 9.487   | -0.611 | H | 2.714   | 9.514   | -0.731 |
| H | 4.153   | 10.332  | -0.892 | H | 4.259   | 10.29   | -1.07  |

|   |        |         |        |   |        |         |        |
|---|--------|---------|--------|---|--------|---------|--------|
| H | 3.922  | 8.692   | -1.532 | H | 3.947  | 8.647   | -1.663 |
| H | 6.185  | -8.528  | 0.941  | H | 6.212  | -8.537  | 1.032  |
| H | 10.324 | -9.018  | 1.957  | H | 10.38  | -9.028  | 1.917  |
| H | 9.225  | -7.588  | -1.935 | H | 9.158  | -7.64   | -1.952 |
| H | 7.61   | -10.464 | 2.881  | H | 7.688  | -10.459 | 2.939  |
| H | 8.591  | -9.241  | 3.693  | H | 8.706  | -9.239  | 3.709  |
| H | 6.894  | -8.911  | 3.316  | H | 7      | -8.897  | 3.388  |
| H | 11.981 | -8.988  | -0.03  | H | 11.981 | -8.999  | -0.091 |
| H | 11.548 | -8.033  | -1.458 | H | 11.496 | -8.115  | -1.548 |
| H | 11.837 | -7.234  | 0.091  | H | 11.822 | -7.242  | -0.049 |
| H | 7.195  | -10.195 | -2.044 | H | 7.115  | -10.254 | -1.944 |
| H | 7.286  | -10.224 | -6.332 | H | 7.077  | -10.369 | -6.232 |
| H | 6.453  | -6.579  | -4.231 | H | 6.323  | -6.679  | -4.18  |
| H | 6.677  | -12.44  | -4.493 | H | 6.517  | -12.545 | -4.339 |
| H | 8.369  | -12.11  | -4.864 | H | 8.201  | -12.229 | -4.754 |
| H | 7.836  | -12.21  | -3.178 | H | 7.707  | -12.296 | -3.055 |
| H | 5.645  | -7.387  | -6.959 | H | 5.43   | -7.542  | -6.869 |
| H | 7.208  | -6.613  | -6.706 | H | 6.998  | -6.763  | -6.673 |
| H | 7.114  | -8.156  | -7.572 | H | 6.883  | -8.322  | -7.507 |
| H | 8.879  | -3.854  | -4.177 | H | 8.765  | -3.943  | -4.235 |
| H | 10.946 | -0.182  | -3.369 | H | 10.856 | -0.267  | -3.511 |
| H | 7.561  | -1.297  | -0.99  | H | 7.512  | -1.344  | -1.057 |
| H | 10.669 | -1.81   | -5.949 | H | 10.536 | -1.911  | -6.062 |
| H | 11.991 | -2.005  | -4.798 | H | 11.873 | -2.126  | -4.932 |
| H | 11.014 | -3.404  | -5.273 | H | 10.866 | -3.51   | -5.39  |
| H | 10.359 | 1.12    | -1.357 | H | 10.315 | 1.055   | -1.499 |
| H | 8.669  | 1.452   | -1.725 | H | 8.622  | 1.395   | -1.846 |
| H | 9.08   | 0.549   | -0.276 | H | 9.048  | 0.506   | -0.393 |
| H | 9.535  | -1.834  | 0.449  | H | 9.512  | -1.875  | 0.353  |
| H | 9.551  | -5.989  | 1.507  | H | 9.541  | -6.014  | 1.471  |

|   |        |        |        |   |        |        |        |
|---|--------|--------|--------|---|--------|--------|--------|
| H | 7.096  | -3.232 | 3.688  | H | 7.138  | -3.219 | 3.663  |
| H | 10.52  | -5.219 | -0.645 | H | 10.438 | -5.267 | -0.734 |
| H | 10.547 | -3.497 | -1.061 | H | 10.508 | -3.545 | -1.142 |
| H | 11.701 | -4.144 | 0.112  | H | 11.662 | -4.233 | 0.009  |
| H | 7.016  | -6.435 | 3.02   | H | 7.031  | -6.428 | 3.042  |
| H | 8.578  | -6.579 | 3.812  | H | 8.611  | -6.572 | 3.799  |
| H | 7.337  | -5.512 | 4.496  | H | 7.392  | -5.489 | 4.499  |
| H | 8.136  | 3.041  | 0.027  | H | 8.146  | 3.004  | -0.096 |
| H | 11.816 | 5.115  | -0.712 | H | 11.827 | 5.044  | -0.922 |
| H | 10.73  | 4.04   | 3.29   | H | 10.807 | 4.017  | 3.109  |
| H | 8.568  | 3.962  | -2.184 | H | 8.54   | 3.923  | -2.32  |
| H | 9.895  | 5.112  | -2.408 | H | 9.895  | 5.029  | -2.589 |
| H | 10.193 | 3.378  | -2.548 | H | 10.139 | 3.284  | -2.707 |
| H | 12.52  | 5.833  | 2.76   | H | 12.6   | 5.786  | 2.531  |
| H | 13.417 | 4.437  | 2.167  | H | 13.477 | 4.382  | 1.928  |
| H | 13.197 | 5.846  | 1.123  | H | 13.245 | 5.787  | 0.881  |
| H | 10.328 | 1.563  | 3.884  | H | 10.398 | 1.554  | 3.741  |
| H | 9.701  | 2.796  | 7.939  | H | 9.848  | 2.838  | 7.79   |
| H | 7.095  | 4.214  | 4.847  | H | 7.198  | 4.236  | 4.728  |
| H | 10.972 | 0.344  | 6.947  | H | 11.084 | 0.361  | 6.798  |
| H | 11.905 | 0.886  | 5.548  | H | 12.003 | 0.893  | 5.386  |
| H | 11.974 | 1.789  | 7.071  | H | 12.094 | 1.803  | 6.903  |
| H | 8.019  | 4.437  | 8.477  | H | 8.181  | 4.489  | 8.34   |
| H | 7.314  | 5.393  | 7.163  | H | 7.473  | 5.445  | 7.029  |
| H | 6.53   | 3.905  | 7.686  | H | 6.676  | 3.971  | 7.571  |
| H | 2.849  | 7.528  | -4.222 | H | 2.79   | 7.476  | -4.271 |
| H | 2.974  | 4.373  | -1.312 | H | 2.965  | 4.329  | -1.354 |
| H | 6.541  | 5.505  | -3.393 | H | 6.489  | 5.436  | -3.521 |
| H | 4.814  | 7.927  | -5.639 | H | 4.723  | 7.856  | -5.738 |
| H | 5.93   | 8.397  | -4.355 | H | 5.868  | 8.327  | -4.48  |

|   |        |        |        |   |        |        |        |
|---|--------|--------|--------|---|--------|--------|--------|
| H | 6.312  | 7.017  | -5.385 | H | 6.223  | 6.941  | -5.512 |
| H | 4.949  | 3.004  | -1.083 | H | 4.94   | 2.953  | -1.162 |
| H | 6.338  | 3.253  | -2.153 | H | 6.306  | 3.191  | -2.264 |
| H | 6.159  | 4.217  | -0.681 | H | 6.163  | 4.165  | -0.794 |
| H | -0.612 | 8.877  | -4.035 | H | -0.644 | 8.871  | -4.006 |
| H | -2.464 | 11.5   | -1.191 | H | -2.402 | 11.505 | -1.112 |
| H | -2.465 | 12.51  | -5.355 | H | -2.5   | 12.522 | -5.273 |
| H | 0.117  | 11.577 | -1.199 | H | 0.183  | 11.56  | -1.189 |
| H | -0.55  | 7.97   | 1.03   | H | -0.461 | 7.958  | 1.056  |
| H | 1.996  | 11.03  | 2.613  | H | 2.153  | 10.995 | 2.574  |
| H | -0.081 | 9.976  | -6.339 | H | -0.162 | 9.976  | -6.322 |
| H | -1.746 | 9.493  | -6.656 | H | -1.835 | 9.497  | -6.595 |
| H | -1.248 | 11.164 | -6.944 | H | -1.341 | 11.167 | -6.895 |
| H | -2.927 | 14.26  | -3.467 | H | -2.888 | 14.275 | -3.361 |
| H | -4.388 | 13.298 | -3.249 | H | -4.358 | 13.329 | -3.132 |
| H | -3.34  | 13.626 | -1.866 | H | -3.288 | 13.633 | -1.759 |
| H | 2.664  | 12.703 | -0.132 | H | 2.777  | 12.656 | -0.178 |
| H | 1.131  | 13.542 | 0.1    | H | 1.256  | 13.511 | 0.071  |
| H | 2.164  | 13.181 | 1.494  | H | 2.305  | 13.148 | 1.452  |
| H | 1.065  | 9.064  | 4.07   | H | 1.223  | 9.036  | 4.058  |
| H | 0.455  | 7.648  | 3.197  | H | 0.604  | 7.621  | 3.19   |
| H | 2.146  | 8.147  | 3.021  | H | 2.291  | 8.126  | 2.99   |

**1c:**

| $(P[4], M[6])$ - <b>1c</b> in the ground state |        |        |        | $(P[4], M[6])$ - <b>1b</b> in the first excited state |        |        |        |
|------------------------------------------------|--------|--------|--------|-------------------------------------------------------|--------|--------|--------|
| C                                              | -1.966 | 1.095  | -0.852 | C                                                     | -1.989 | 1.096  | -0.907 |
| C                                              | -0.631 | 1.541  | -0.592 | C                                                     | -0.659 | 1.542  | -0.66  |
| C                                              | 0.42   | 0.613  | -0.593 | C                                                     | 0.408  | 0.607  | -0.697 |
| C                                              | 0.115  | -0.785 | -0.59  | C                                                     | 0.107  | -0.793 | -0.703 |
| C                                              | -1.237 | -1.226 | -0.532 | C                                                     | -1.246 | -1.234 | -0.623 |

|   |        |        |        |   |        |        |        |
|---|--------|--------|--------|---|--------|--------|--------|
| C | -2.264 | -0.29  | -0.959 | C | -2.284 | -0.294 | -1.027 |
| C | 1.179  | -1.744 | -0.573 | C | 1.175  | -1.746 | -0.704 |
| C | 0.864  | -3.079 | -0.4   | C | 0.856  | -3.094 | -0.554 |
| C | -0.444 | -3.519 | -0.086 | C | -0.439 | -3.532 | -0.224 |
| C | -1.499 | -2.553 | -0.026 | C | -1.497 | -2.561 | -0.126 |
| C | 1.792  | 1.053  | -0.47  | C | 1.761  | 1.051  | -0.608 |
| C | 2.852  | 0.117  | -0.535 | C | 2.831  | 0.111  | -0.681 |
| C | 2.564  | -1.275 | -0.725 | C | 2.55   | -1.278 | -0.839 |
| C | 2.065  | 2.427  | -0.276 | C | 2.033  | 2.436  | -0.425 |
| C | 3.423  | 2.895  | -0.232 | C | 3.391  | 2.908  | -0.419 |
| C | 4.442  | 1.955  | -0.388 | C | 4.41   | 1.966  | -0.584 |
| C | 4.209  | 0.567  | -0.46  | C | 4.186  | 0.572  | -0.617 |
| C | 5.291  | -0.403 | -0.533 | C | 5.27   | -0.389 | -0.636 |
| C | 4.97   | -1.704 | -1.026 | C | 4.961  | -1.721 | -1.083 |
| C | 3.607  | -2.109 | -1.064 | C | 3.617  | -2.13  | -1.131 |
| C | -2.712 | 3.495  | -0.849 | C | -2.741 | 3.495  | -0.868 |
| C | -2.964 | 2.093  | -1.07  | C | -2.991 | 2.094  | -1.103 |
| C | -4.231 | 1.703  | -1.511 | C | -4.268 | 1.704  | -1.522 |
| C | -5.188 | 2.713  | -1.812 | C | -5.24  | 2.711  | -1.775 |
| C | -4.914 | 4.107  | -1.772 | C | -4.978 | 4.11   | -1.711 |
| C | -3.631 | 4.459  | -1.267 | C | -3.691 | 4.464  | -1.247 |
| C | -6.439 | 2.294  | -2.239 | C | -6.498 | 2.291  | -2.177 |
| C | -7.482 | 3.107  | -2.627 | C | -7.561 | 3.103  | -2.519 |
| C | -7.213 | 4.483  | -2.66  | C | -7.306 | 4.482  | -2.534 |
| C | -5.953 | 4.988  | -2.264 | C | -6.043 | 4.993  | -2.162 |
| C | -4.522 | 0.308  | -1.725 | C | -4.556 | 0.311  | -1.747 |
| C | -5.825 | -0.077 | -2.173 | C | -5.866 | -0.076 | -2.164 |
| C | -6.759 | 0.93   | -2.389 | C | -6.812 | 0.929  | -2.34  |
| C | -3.542 | -0.682 | -1.523 | C | -3.564 | -0.68  | -1.575 |
| C | -3.888 | -2.012 | -1.958 | C | -3.918 | -2.007 | -2.015 |

|   |         |        |        |   |         |        |        |
|---|---------|--------|--------|---|---------|--------|--------|
| C | -5.143  | -2.367 | -2.384 | C | -5.181  | -2.362 | -2.416 |
| C | -6.211  | -1.408 | -2.451 | C | -6.255  | -1.406 | -2.446 |
| C | -7.575  | -1.635 | -2.847 | C | -7.627  | -1.635 | -2.805 |
| C | -8.471  | -0.557 | -3.046 | C | -8.536  | -0.558 | -2.968 |
| C | -8.053  | 0.764  | -2.846 | C | -8.119  | 0.76   | -2.762 |
| C | -8.701  | 2.188  | -2.959 | C | -8.781  | 2.181  | -2.834 |
| C | -9.233  | 2.535  | -4.352 | C | -9.348  | 2.55   | -4.208 |
| C | -9.787  | 2.276  | -1.869 | C | -9.84   | 2.243  | -1.716 |
| C | -10.064 | 3.654  | -4.508 | C | -10.183 | 3.671  | -4.325 |
| C | -10.506 | 4.056  | -5.77  | C | -10.659 | 4.092  | -5.568 |
| C | -10.111 | 3.311  | -6.889 | C | -10.294 | 3.365  | -6.708 |
| C | -9.283  | 2.193  | -6.763 | C | -9.462  | 2.246  | -6.621 |
| C | -8.849  | 1.816  | -5.485 | C | -8.994  | 1.849  | -5.362 |
| C | -11.042 | 1.697  | -2.098 | C | -11.103 | 1.676  | -1.928 |
| C | -12.03  | 1.696  | -1.111 | C | -12.066 | 1.652  | -0.916 |
| C | -11.746 | 2.291  | 0.125  | C | -11.748 | 2.213  | 0.328  |
| C | -10.499 | 2.864  | 0.386  | C | -10.491 | 2.773  | 0.571  |
| C | -9.528  | 2.853  | -0.623 | C | -9.547  | 2.785  | -0.462 |
| C | -5.712  | 6.445  | -2.447 | C | -5.822  | 6.454  | -2.319 |
| C | -8.081  | -3.02  | -3.015 | C | -8.133  | -3.02  | -2.968 |
| C | -7.792  | -3.996 | -2.048 | C | -7.809  | -4.003 | -2.019 |
| C | -8.278  | -5.298 | -2.159 | C | -8.293  | -5.306 | -2.127 |
| C | -9.073  | -5.625 | -3.264 | C | -9.12   | -5.628 | -3.21  |
| C | -9.384  | -4.677 | -4.245 | C | -9.466  | -4.672 | -4.173 |
| C | -8.883  | -3.378 | -4.108 | C | -8.967  | -3.372 | -4.039 |
| C | -5.216  | 7.247  | -1.415 | C | -5.285  | 7.236  | -1.29  |
| C | -4.987  | 8.618  | -1.593 | C | -5.068  | 8.61   | -1.447 |
| C | -5.269  | 9.184  | -2.838 | C | -5.401  | 9.203  | -2.668 |
| C | -5.776  | 8.411  | -3.894 | C | -5.95   | 8.452  | -3.719 |
| C | -5.995  | 7.049  | -3.686 | C | -6.158  | 7.085  | -3.531 |

|   |        |         |       |   |        |         |        |
|---|--------|---------|-------|---|--------|---------|--------|
| C | -3.721 | -1.968  | 1.109 | C | -3.694 | -1.993  | 1.065  |
| C | -2.744 | -2.912  | 0.631 | C | -2.728 | -2.93   | 0.554  |
| C | -3.001 | -4.267  | 0.896 | C | -2.976 | -4.288  | 0.816  |
| C | -4.272 | -4.635  | 1.443 | C | -4.228 | -4.661  | 1.4    |
| C | -5.301 | -3.716  | 1.757 | C | -5.249 | -3.746  | 1.753  |
| C | -4.939 | -2.335  | 1.622 | C | -4.895 | -2.365  | 1.613  |
| C | -4.491 | -5.976  | 1.74  | C | -4.438 | -6.005  | 1.693  |
| C | -5.617 | -6.509  | 2.342 | C | -5.544 | -6.543  | 2.326  |
| C | -6.666 | -5.613  | 2.595 | C | -6.586 | -5.651  | 2.619  |
| C | -6.535 | -4.241  | 2.274 | C | -6.467 | -4.278  | 2.302  |
| C | -1.988 | -5.275  | 0.675 | C | -1.971 | -5.297  | 0.55   |
| C | -2.248 | -6.642  | 1.009 | C | -2.223 | -6.667  | 0.877  |
| C | -3.495 | -6.954  | 1.545 | C | -3.451 | -6.982  | 1.454  |
| C | -0.705 | -4.915  | 0.23  | C | -0.703 | -4.935  | 0.068  |
| C | 0.268  | -5.966  | 0.13  | C | 0.26   | -5.988  | -0.084 |
| C | 0.003  | -7.278  | 0.449 | C | 0.002  | -7.304  | 0.227  |
| C | -1.29  | -7.682  | 0.915 | C | -1.273 | -7.709  | 0.736  |
| C | -1.686 | -8.994  | 1.354 | C | -1.656 | -9.026  | 1.176  |
| C | -2.959 | -9.223  | 1.92  | C | -2.908 | -9.258  | 1.786  |
| C | -3.89  | -8.182  | 2.039 | C | -3.83  | -8.214  | 1.948  |
| C | -5.301 | -8.006  | 2.691 | C | -5.218 | -8.043  | 2.65   |
| C | -6.285 | -9.06   | 2.178 | C | -6.218 | -9.09   | 2.155  |
| C | -5.225 | -8.06   | 4.236 | C | -5.09  | -8.112  | 4.191  |
| C | -6.064 | -10.402 | 2.528 | C | -5.996 | -10.435 | 2.495  |
| C | -6.916 | -11.416 | 2.095 | C | -6.858 | -11.443 | 2.07   |
| C | -8.028 | -11.067 | 1.314 | C | -7.981 | -11.087 | 1.308  |
| C | -8.287 | -9.742  | 0.968 | C | -8.239 | -9.759  | 0.971  |
| C | -7.399 | -8.743  | 1.404 | C | -7.341 | -8.766  | 1.399  |
| C | -4.02  | -7.938  | 4.926 | C | -3.863 | -7.991  | 4.84   |
| C | -3.988 | -7.917  | 6.329 | C | -3.783 | -7.986  | 6.241  |

|   |        |         |        |   |        |         |        |
|---|--------|---------|--------|---|--------|---------|--------|
| C | -5.189 | -8.019  | 7.031  | C | -4.958 | -8.104  | 6.983  |
| C | -6.416 | -8.138  | 6.362  | C | -6.207 | -8.221  | 6.355  |
| C | -6.418 | -8.16   | 4.968  | C | -6.257 | -8.226  | 4.962  |
| C | -7.708 | -3.345  | 2.442  | C | -7.639 | -3.387  | 2.501  |
| C | -0.753 | -10.147 | 1.25   | C | -0.734 | -10.181 | 1.022  |
| C | -0.51  | -10.964 | 2.364  | C | -0.453 | -11.013 | 2.115  |
| C | 0.345  | -12.067 | 2.284  | C | 0.39   | -12.121 | 1.989  |
| C | 0.957  | -12.353 | 1.059  | C | 0.954  | -12.395 | 0.739  |
| C | 0.73   | -11.564 | -0.075 | C | 0.69   | -11.589 | -0.375 |
| C | -0.125 | -10.464 | 0.035  | C | -0.153 | -10.486 | -0.22  |
| C | -8.514 | -3.4    | 3.592  | C | -8.414 | -3.441  | 3.671  |
| C | -9.64  | -2.586  | 3.724  | C | -9.542 | -2.632  | 3.829  |
| C | -9.968 | -1.71   | 2.678  | C | -9.901 | -1.763  | 2.788  |
| C | -9.19  | -1.631  | 1.52   | C | -9.155 | -1.686  | 1.609  |
| C | -8.061 | -2.452  | 1.42   | C | -8.025 | -2.501  | 1.484  |
| C | 4.996  | 4.897   | 0.091  | C | 4.959  | 4.912   | -0.137 |
| C | 3.69   | 4.31    | 0.013  | C | 3.658  | 4.321   | -0.187 |
| C | 2.601  | 5.161   | 0.264  | C | 2.564  | 5.176   | 0.089  |
| C | 2.845  | 6.511   | 0.664  | C | 2.818  | 6.525   | 0.492  |
| C | 4.134  | 7.078   | 0.81   | C | 4.112  | 7.087   | 0.626  |
| C | 5.218  | 6.21    | 0.453  | C | 5.186  | 6.224   | 0.232  |
| C | 1.744  | 7.293   | 1.002  | C | 1.725  | 7.303   | 0.861  |
| C | 1.775  | 8.583   | 1.492  | C | 1.769  | 8.589   | 1.381  |
| C | 3.044  | 9.168   | 1.611  | C | 3.037  | 9.165   | 1.492  |
| C | 4.21   | 8.435   | 1.29   | C | 4.2    | 8.432   | 1.135  |
| C | 1.241  | 4.677   | 0.182  | C | 1.217  | 4.693   | 0.036  |
| C | 0.138  | 5.507   | 0.519  | C | 0.119  | 5.523   | 0.409  |
| C | 0.425  | 6.795   | 0.956  | C | 0.415  | 6.803   | 0.845  |
| C | 0.978  | 3.339   | -0.123 | C | 0.953  | 3.338   | -0.248 |
| C | -0.383 | 2.929   | -0.315 | C | -0.407 | 2.918   | -0.383 |

|   |        |        |        |   |        |        |        |
|---|--------|--------|--------|---|--------|--------|--------|
| C | -1.456 | 3.85   | -0.205 | C | -1.487 | 3.849  | -0.256 |
| C | -1.221 | 5.096  | 0.488  | C | -1.236 | 5.1    | 0.438  |
| C | -2.164 | 5.933  | 1.213  | C | -2.147 | 5.911  | 1.209  |
| C | -1.784 | 7.223  | 1.654  | C | -1.763 | 7.219  | 1.646  |
| C | -0.48  | 7.701  | 1.459  | C | -0.483 | 7.704  | 1.406  |
| C | 0.299  | 9.013  | 1.799  | C | 0.301  | 9.017  | 1.729  |
| C | -0.065 | 10.161 | 0.839  | C | -0.089 | 10.164 | 0.778  |
| C | 0.037  | 9.373  | 3.265  | C | 0.075  | 9.378  | 3.201  |
| C | -0.727 | 9.921  | -0.368 | C | -0.788 | 9.924  | -0.408 |
| C | -1.005 | 10.963 | -1.262 | C | -1.091 | 10.964 | -1.295 |
| C | -0.611 | 12.26  | -0.923 | C | -0.679 | 12.26  | -0.973 |
| C | 0.06   | 12.529 | 0.277  | C | 0.03   | 12.529 | 0.205  |
| C | 0.33   | 11.469 | 1.146  | C | 0.321  | 11.471 | 1.069  |
| C | 0.917  | 9.007  | 4.283  | C | 0.974  | 9.001  | 4.199  |
| C | 0.616  | 9.266  | 5.628  | C | 0.706  | 9.263  | 5.551  |
| C | -0.588 | 9.9    | 5.938  | C | -0.485 | 9.907  | 5.887  |
| C | -1.493 | 10.277 | 4.935  | C | -1.409 | 10.293 | 4.906  |
| C | -1.168 | 10.008 | 3.606  | C | -1.116 | 10.023 | 3.569  |
| C | 5.524  | 9.102  | 1.491  | C | 5.518  | 9.083  | 1.348  |
| C | -3.493 | 5.404  | 1.633  | C | -3.45  | 5.368  | 1.68   |
| C | -4.614 | 6.24   | 1.733  | C | -4.576 | 6.191  | 1.827  |
| C | -5.892 | 5.733  | 1.995  | C | -5.838 | 5.666  | 2.134  |
| C | -6.042 | 4.358  | 2.192  | C | -5.963 | 4.288  | 2.329  |
| C | -4.935 | 3.499  | 2.171  | C | -4.846 | 3.443  | 2.264  |
| C | -3.673 | 4.04   | 1.924  | C | -3.602 | 4      | 1.972  |
| C | 6.539  | 8.499  | 2.248  | C | 6.539  | 8.44   | 2.065  |
| C | 7.766  | 9.136  | 2.458  | C | 7.771  | 9.061  | 2.29   |
| C | 7.969  | 10.401 | 1.896  | C | 7.973  | 10.35  | 1.786  |
| C | 6.974  | 11.035 | 1.141  | C | 6.973  | 11.024 | 1.074  |
| C | 5.757  | 10.376 | 0.949  | C | 5.751  | 10.381 | 0.865  |

|   |        |        |        |   |        |        |        |
|---|--------|--------|--------|---|--------|--------|--------|
| C | 5.795  | -3.877 | -2.09  | C | 5.836  | -3.918 | -2.06  |
| C | 6.02   | -2.612 | -1.444 | C | 6.035  | -2.634 | -1.452 |
| C | 7.356  | -2.233 | -1.235 | C | 7.361  | -2.236 | -1.224 |
| C | 8.398  | -3.109 | -1.672 | C | 8.421  | -3.117 | -1.607 |
| C | 8.186  | -4.342 | -2.337 | C | 8.234  | -4.373 | -2.235 |
| C | 6.81   | -4.701 | -2.52  | C | 6.868  | -4.75  | -2.436 |
| C | 9.708  | -2.742 | -1.389 | C | 9.721  | -2.728 | -1.309 |
| C | 10.845 | -3.462 | -1.699 | C | 10.871 | -3.446 | -1.571 |
| C | 10.65  | -4.674 | -2.37  | C | 10.702 | -4.682 | -2.206 |
| C | 9.346  | -5.112 | -2.7   | C | 9.411  | -5.144 | -2.548 |
| C | 7.672  | -1.01  | -0.534 | C | 7.654  | -0.983 | -0.56  |
| C | 9.033  | -0.703 | -0.211 | C | 9.003  | -0.652 | -0.224 |
| C | 10.017 | -1.574 | -0.665 | C | 10.005 | -1.531 | -0.624 |
| C | 6.656  | -0.115 | -0.14  | C | 6.621  | -0.08  | -0.225 |
| C | 7.072  | 0.982  | 0.701  | C | 7.013  | 1.053  | 0.58   |
| C | 8.381  | 1.25   | 1.02   | C | 8.314  | 1.347  | 0.912  |
| C | 9.448  | 0.417  | 0.551  | C | 9.397  | 0.504  | 0.498  |
| C | 10.857 | 0.582  | 0.785  | C | 10.799 | 0.694  | 0.747  |
| C | 11.799 | -0.339 | 0.273  | C | 11.76  | -0.238 | 0.292  |
| C | 11.377 | -1.457 | -0.455 | C | 11.36  | -1.39  | -0.395 |
| C | 12.076 | -2.685 | -1.126 | C | 12.083 | -2.635 | -1.007 |
| C | 13.034 | -2.155 | -2.203 | C | 13.052 | -2.134 | -2.087 |
| C | 12.785 | -3.613 | -0.128 | C | 12.787 | -3.516 | 0.037  |
| C | 14.277 | -1.636 | -1.811 | C | 14.288 | -1.596 | -1.697 |
| C | 15.153 | -1.077 | -2.741 | C | 15.171 | -1.059 | -2.633 |
| C | 14.768 | -1.041 | -4.089 | C | 14.802 | -1.066 | -3.986 |
| C | 13.537 | -1.549 | -4.507 | C | 13.58  | -1.594 | -4.403 |
| C | 12.676 | -2.106 | -3.549 | C | 12.711 | -2.128 | -3.439 |
| C | 13.652 | -4.603 | -0.618 | C | 13.67  | -4.515 | -0.4   |
| C | 14.252 | -5.526 | 0.237  | C | 14.269 | -5.396 | 0.5    |

|   |         |         |        |   |         |         |        |
|---|---------|---------|--------|---|---------|---------|--------|
| C | 13.975  | -5.449  | 1.611  | C | 13.973  | -5.265  | 1.865  |
| C | 13.119  | -4.475  | 2.125  | C | 13.101  | -4.28   | 2.328  |
| C | 12.527  | -3.56   | 1.241  | C | 12.51   | -3.41   | 1.399  |
| C | 9.212   | -6.404  | -3.424 | C | 9.304   | -6.456  | -3.238 |
| C | 11.372  | 1.734   | 1.574  | C | 11.289  | 1.888   | 1.489  |
| C | 10.908  | 1.995   | 2.873  | C | 10.794  | 2.214   | 2.762  |
| C | 11.407  | 3.066   | 3.619  | C | 11.264  | 3.33    | 3.459  |
| C | 12.388  | 3.884   | 3.047  | C | 12.25   | 4.127   | 2.864  |
| C | 12.878  | 3.646   | 1.759  | C | 12.772  | 3.824   | 1.603  |
| C | 12.364  | 2.565   | 1.035  | C | 12.285  | 2.7     | 0.928  |
| C | 8.463   | -6.501  | -4.607 | C | 8.58    | -6.593  | -4.433 |
| C | 8.361   | -7.708  | -5.304 | C | 8.507   | -7.818  | -5.102 |
| C | 9.022   | -8.833  | -4.798 | C | 9.174   | -8.921  | -4.556 |
| C | 9.781   | -8.77   | -3.624 | C | 9.908   | -8.819  | -3.369 |
| C | 9.869   | -7.549  | -2.949 | C | 9.967   | -7.58   | -2.723 |
| C | -6.049  | 9.047   | -5.237 | C | -6.279  | 9.116   | -5.035 |
| C | -4.462  | 9.45    | -0.446 | C | -4.499  | 9.421   | -0.305 |
| C | -7.976  | -6.313  | -1.086 | C | -7.954  | -6.328  | -1.072 |
| C | -10.208 | -5.058  | -5.453 | C | -10.324 | -5.047  | -5.358 |
| C | -9.55   | -0.713  | 0.379  | C | -9.548  | -0.776  | 0.472  |
| C | -10.476 | -2.619  | 4.982  | C | -10.344 | -2.665  | 5.109  |
| C | 0.634   | -12.906 | 3.507  | C | 0.719   | -12.978 | 3.19   |
| C | 1.364   | -11.919 | -1.399 | C | 1.272   | -11.931 | -1.727 |
| C | 7.23    | 12.384  | 0.512  | C | 7.229   | 12.401  | 0.508  |
| C | 8.832   | 8.486   | 3.31   | C | 8.843   | 8.366   | 3.098  |
| C | -7.085  | 6.658   | 1.97   | C | -7.041  | 6.577   | 2.16   |
| C | -5.105  | 2.006   | 2.333  | C | -4.993  | 1.947   | 2.424  |
| C | 10.456  | -10.003 | -3.071 | C | 10.588  | -10.029 | -2.773 |
| C | 7.589   | -7.787  | -6.6   | C | 7.762   | -7.939  | -6.411 |
| C | 10.927  | 3.317   | 5.03   | C | 10.747  | 3.653   | 4.842  |

|   |         |        |        |   |         |        |        |
|---|---------|--------|--------|---|---------|--------|--------|
| C | 13.911  | 4.561  | 1.144  | C | 13.81   | 4.716  | 0.962  |
| C | -7.705  | -8.237 | 7.144  | C | -7.467  | -8.337 | 7.181  |
| C | -2.668  | -7.77  | 7.049  | C | -2.439  | -7.839 | 6.917  |
| C | -6.65   | -12.86 | 2.449  | C | -6.594  | -12.89 | 2.415  |
| C | -9.497  | -9.38  | 0.138  | C | -9.458  | -9.389 | 0.158  |
| C | 13.116  | -1.488 | -5.956 | C | 13.174  | -1.578 | -5.858 |
| C | 16.503  | -0.547 | -2.316 | C | 16.512  | -0.508 | -2.209 |
| C | 15.199  | -6.577 | -0.293 | C | 15.233  | -6.458 | 0.026  |
| C | 12.825  | -4.388 | 3.604  | C | 12.786  | -4.136 | 3.799  |
| C | 1.578   | 8.839  | 6.712  | C | 1.688   | 8.826  | 6.612  |
| C | -2.779  | 10.985 | 5.293  | C | -2.682  | 11.009 | 5.293  |
| C | -1.69   | 10.676 | -2.578 | C | -1.821  | 10.675 | -2.586 |
| C | 0.45    | 13.941 | 0.644  | C | 0.437   | 13.941 | 0.554  |
| C | -8.837  | 1.414  | -7.977 | C | -9.048  | 1.486  | -7.86  |
| C | -11.375 | 5.282  | -5.928 | C | -11.534 | 5.318  | -5.684 |
| C | -13.365 | 1.034  | -1.361 | C | -13.409 | 1.002  | -1.148 |
| C | -10.176 | 3.458  | 1.736  | C | -10.129 | 3.323  | 1.931  |
| H | 1.668   | -3.802 | -0.389 | H | 1.658   | -3.819 | -0.57  |
| H | 5.457   | 2.309  | -0.478 | H | 5.423   | 2.32   | -0.697 |
| H | 3.387   | -3.134 | -1.334 | H | 3.4     | -3.157 | -1.392 |
| H | -3.356  | 5.501  | -1.177 | H | -3.411  | 5.505  | -1.164 |
| H | -7.963  | 5.188  | -3.004 | H | -8.074  | 5.185  | -2.842 |
| H | -3.116  | -2.77  | -1.958 | H | -3.144  | -2.763 | -2.037 |
| H | -5.319  | -3.388 | -2.703 | H | -5.361  | -3.38  | -2.742 |
| H | -9.493  | -0.784 | -3.334 | H | -9.564  | -0.788 | -3.228 |
| H | -10.382 | 4.207  | -3.629 | H | -10.478 | 4.209  | -3.429 |
| H | -10.462 | 3.606  | -7.875 | H | -10.671 | 3.675  | -7.68  |
| H | -8.206  | 0.949  | -5.377 | H | -8.349  | 0.979  | -5.285 |
| H | -11.254 | 1.255  | -3.068 | H | -11.343 | 1.262  | -2.904 |
| H | -12.513 | 2.305  | 0.898  | H | -12.493 | 2.208  | 1.12   |

|   |        |         |        |   |         |         |        |
|---|--------|---------|--------|---|---------|---------|--------|
| H | -8.561 | 3.304   | -0.428 | H | -8.572  | 3.226   | -0.28  |
| H | -7.191 | -3.731  | -1.185 | H | -7.184  | -3.743  | -1.172 |
| H | -9.458 | -6.639  | -3.362 | H | -9.502  | -6.642  | -3.305 |
| H | -9.1   | -2.636  | -4.872 | H | -9.212  | -2.625  | -4.789 |
| H | -5.025 | 6.795   | -0.452 | H | -5.057  | 6.764   | -0.345 |
| H | -5.093 | 10.247  | -2.993 | H | -5.235  | 10.269  | -2.806 |
| H | -6.367 | 6.434   | -4.5   | H | -6.56   | 6.487   | -4.344 |
| H | -3.481 | -0.914  | 1.076  | H | -3.459  | -0.937  | 1.026  |
| H | -5.62  | -1.566  | 1.968  | H | -5.568  | -1.598  | 1.981  |
| H | -7.606 | -5.954  | 3.018  | H | -7.513  | -5.999  | 3.065  |
| H | 1.269  | -5.729  | -0.213 | H | 1.247   | -5.75   | -0.465 |
| H | 0.797  | -8.012  | 0.367  | H | 0.789   | -8.04   | 0.103  |
| H | -3.195 | -10.231 | 2.243  | H | -3.138  | -10.268 | 2.106  |
| H | -5.23  | -10.65  | 3.177  | H | -5.152  | -10.689 | 3.129  |
| H | -8.712 | -11.848 | 0.985  | H | -8.672  | -11.863 | 0.985  |
| H | -7.595 | -7.709  | 1.15   | H | -7.538  | -7.73   | 1.153  |
| H | -3.088 | -7.858  | 4.377  | H | -2.951  | -7.9    | 4.26   |
| H | -5.175 | -8.01   | 8.119  | H | -4.906  | -8.108  | 8.07   |
| H | -7.359 | -8.271  | 4.436  | H | -7.216  | -8.333  | 4.462  |
| H | -0.981 | -10.716 | 3.311  | H | -0.887  | -10.775 | 3.083  |
| H | 1.625  | -13.209 | 0.985  | H | 1.612   | -13.254 | 0.629  |
| H | -0.328 | -9.853  | -0.84  | H | -0.385  | -9.862  | -1.078 |
| H | -8.24  | -4.074  | 4.4    | H | -8.116  | -4.111  | 4.474  |
| H | -10.85 | -1.08   | 2.769  | H | -10.784 | -1.136  | 2.899  |
| H | -7.459 | -2.405  | 0.519  | H | -7.447  | -2.456  | 0.567  |
| H | 5.863  | 4.287   | -0.141 | H | 5.823   | 4.307   | -0.392 |
| H | 6.235  | 6.584   | 0.474  | H | 6.203   | 6.599   | 0.234  |
| H | 3.162  | 10.176  | 1.995  | H | 3.167   | 10.161  | 1.903  |
| H | -2.494 | 7.806   | 2.23   | H | -2.463  | 7.793   | 2.243  |
| H | -1.03  | 8.912   | -0.624 | H | -1.103  | 8.915   | -0.652 |

|   |        |        |        |   |        |        |        |
|---|--------|--------|--------|---|--------|--------|--------|
| H | -0.828 | 13.079 | -1.605 | H | -0.913 | 13.078 | -1.652 |
| H | 0.836  | 11.665 | 2.087  | H | 0.856  | 11.668 | 1.994  |
| H | 1.849  | 8.51   | 4.035  | H | 1.895  | 8.494  | 3.93   |
| H | -0.83  | 10.107 | 6.978  | H | -0.703 | 10.115 | 6.933  |
| H | -1.852 | 10.308 | 2.817  | H | -1.814 | 10.33  | 2.795  |
| H | -4.506 | 7.305  | 1.551  | H | -4.488 | 7.258  | 1.65   |
| H | -7.034 | 3.947  | 2.366  | H | -6.943 | 3.864  | 2.539  |
| H | -2.815 | 3.377  | 1.915  | H | -2.736 | 3.348  | 1.929  |
| H | 6.358  | 7.526  | 2.698  | H | 6.358  | 7.449  | 2.472  |
| H | 8.921  | 10.905 | 2.05   | H | 8.929  | 10.842 | 1.953  |
| H | 4.979  | 10.845 | 0.353  | H | 4.969  | 10.881 | 0.3    |
| H | 4.777  | -4.201 | -2.273 | H | 4.825  | -4.256 | -2.255 |
| H | 6.559  | -5.643 | -2.994 | H | 6.635  | -5.71  | -2.884 |
| H | 11.491 | -5.297 | -2.658 | H | 11.555 | -5.304 | -2.459 |
| H | 6.312  | 1.607  | 1.151  | H | 6.24   | 1.688  | 0.991  |
| H | 8.6    | 2.099  | 1.658  | H | 8.513  | 2.223  | 1.517  |
| H | 12.85  | -0.17  | 0.486  | H | 12.805 | -0.049 | 0.514  |
| H | 14.568 | -1.687 | -0.765 | H | 14.566 | -1.613 | -0.647 |
| H | 15.444 | -0.609 | -4.824 | H | 15.485 | -0.652 | -4.725 |
| H | 11.717 | -2.503 | -3.865 | H | 11.758 | -2.54  | -3.754 |
| H | 13.866 | -4.641 | -1.682 | H | 13.899 | -4.595 | -1.459 |
| H | 14.439 | -6.163 | 2.287  | H | 14.436 | -5.946 | 2.577  |
| H | 11.854 | -2.804 | 1.633  | H | 11.825 | -2.645 | 1.751  |
| H | 10.163 | 1.337  | 3.311  | H | 10.047 | 1.572  | 3.219  |
| H | 12.78  | 4.723  | 3.619  | H | 12.62  | 5.001  | 3.398  |
| H | 12.722 | 2.372  | 0.028  | H | 12.667 | 2.458  | -0.06  |
| H | 7.974  | -5.613 | -4.998 | H | 8.086  | -5.722 | -4.855 |
| H | 8.946  | -9.779 | -5.331 | H | 9.122  | -9.88  | -5.068 |
| H | 10.442 | -7.483 | -2.027 | H | 10.52  | -7.485 | -1.792 |
| H | -5.114 | 9.313  | -5.746 | H | -5.366 | 9.391  | -5.577 |

|   |         |         |        |   |         |         |        |
|---|---------|---------|--------|---|---------|---------|--------|
| H | -6.63   | 9.97    | -5.131 | H | -6.852  | 10.037  | -4.884 |
| H | -6.603  | 8.373   | -5.896 | H | -6.863  | 8.457   | -5.683 |
| H | -5.184  | 9.482   | 0.379  | H | -5.195  | 9.448   | 0.543  |
| H | -3.53   | 9.036   | -0.046 | H | -3.56   | 8.991   | 0.06   |
| H | -4.259  | 10.48   | -0.751 | H | -4.293  | 10.452  | -0.601 |
| H | -7.667  | -7.274  | -1.511 | H | -7.673  | -7.29   | -1.513 |
| H | -8.863  | -6.502  | -0.471 | H | -8.816  | -6.512  | -0.421 |
| H | -7.182  | -5.969  | -0.418 | H | -7.13   | -5.993  | -0.437 |
| H | -10.906 | -5.868  | -5.223 | H | -11.02  | -5.854  | -5.11  |
| H | -10.785 | -4.207  | -5.828 | H | -10.908 | -4.193  | -5.716 |
| H | -9.567  | -5.403  | -6.274 | H | -9.708  | -5.394  | -6.197 |
| H | -10.448 | -0.128  | 0.587  | H | -10.449 | -0.202  | 0.695  |
| H | -8.742  | -0.007  | 0.158  | H | -8.753  | -0.061  | 0.236  |
| H | -9.719  | -1.282  | -0.542 | H | -9.726  | -1.35   | -0.443 |
| H | -10.209 | -1.794  | 5.655  | H | -10.067 | -1.835  | 5.77   |
| H | -11.543 | -2.518  | 4.756  | H | -11.417 | -2.575  | 4.91   |
| H | -10.333 | -3.551  | 5.536  | H | -10.179 | -3.593  | 5.663  |
| H | -0.22   | -12.923 | 4.192  | H | -0.106  | -12.993 | 3.909  |
| H | 0.873   | -13.939 | 3.238  | H | 0.935   | -14.01  | 2.898  |
| H | 1.49    | -12.507 | 4.064  | H | 1.603   | -12.595 | 3.716  |
| H | 2.363   | -12.344 | -1.263 | H | 2.271   | -12.368 | -1.634 |
| H | 1.453   | -11.043 | -2.049 | H | 1.346   | -11.046 | -2.367 |
| H | 0.764   | -12.664 | -1.936 | H | 0.645   | -12.662 | -2.252 |
| H | 6.295   | 12.909  | 0.295  | H | 6.295   | 12.94   | 0.327  |
| H | 7.834   | 13.022  | 1.166  | H | 7.844   | 13.003  | 1.184  |
| H | 7.776   | 12.281  | -0.434 | H | 7.762   | 12.34   | -0.449 |
| H | 9.832   | 8.833   | 3.034  | H | 9.842   | 8.724   | 2.829  |
| H | 8.812   | 7.396   | 3.213  | H | 8.82    | 7.283   | 2.946  |
| H | 8.685   | 8.721   | 4.372  | H | 8.708   | 8.548   | 4.171  |
| H | -7.326  | 6.943   | 0.938  | H | -7.316  | 6.877   | 1.141  |

|   |         |         |        |   |         |         |        |
|---|---------|---------|--------|---|---------|---------|--------|
| H | -7.972  | 6.187   | 2.402  | H | -7.91   | 6.088   | 2.61   |
| H | -6.889  | 7.583   | 2.523  | H | -6.839  | 7.494   | 2.724  |
| H | -5.195  | 1.525   | 1.35   | H | -5.14   | 1.474   | 1.445  |
| H | -6.004  | 1.758   | 2.905  | H | -5.853  | 1.687   | 3.049  |
| H | -4.244  | 1.555   | 2.836  | H | -4.099  | 1.5     | 2.869  |
| H | 11.374  | -9.749  | -2.532 | H | 11.491  | -9.749  | -2.221 |
| H | 10.712  | -10.711 | -3.865 | H | 10.871  | -10.751 | -3.545 |
| H | 9.8     | -10.528 | -2.365 | H | 9.924   | -10.546 | -2.069 |
| H | 7.123   | -8.768  | -6.73  | H | 7.309   | -8.929  | -6.523 |
| H | 6.801   | -7.028  | -6.645 | H | 6.968   | -7.19   | -6.491 |
| H | 8.248   | -7.623  | -7.462 | H | 8.437   | -7.791  | -7.263 |
| H | 9.958   | 2.843   | 5.215  | H | 9.776   | 3.187   | 5.027  |
| H | 10.825  | 4.388   | 5.233  | H | 10.638  | 4.733   | 4.984  |
| H | 11.635  | 2.915   | 5.765  | H | 11.437  | 3.293   | 5.615  |
| H | 14.575  | 4.985   | 1.904  | H | 14.442  | 5.2     | 1.713  |
| H | 14.528  | 4.033   | 0.41   | H | 14.458  | 4.152   | 0.284  |
| H | 13.433  | 5.4     | 0.624  | H | 13.336  | 5.51    | 0.373  |
| H | -8.561  | -8.417  | 6.488  | H | -8.344  | -8.515  | 6.552  |
| H | -7.9    | -7.314  | 7.703  | H | -7.647  | -7.422  | 7.757  |
| H | -7.664  | -9.052  | 7.876  | H | -7.396  | -9.161  | 7.9    |
| H | -2.768  | -7.964  | 8.12   | H | -2.502  | -8.042  | 7.989  |
| H | -2.266  | -6.757  | 6.93   | H | -2.046  | -6.822  | 6.793  |
| H | -1.918  | -8.461  | 6.648  | H | -1.7    | -8.522  | 6.485  |
| H | -7.572  | -13.377 | 2.734  | H | -7.513  | -13.405 | 2.712  |
| H | -6.226  | -13.402 | 1.595  | H | -6.185  | -13.431 | 1.553  |
| H | -5.943  | -12.946 | 3.278  | H | -5.874  | -12.982 | 3.233  |
| H | -10.216 | -10.204 | 0.101  | H | -10.181 | -10.209 | 0.128  |
| H | -9.215  | -9.138  | -0.893 | H | -9.188  | -9.146  | -0.876 |
| H | -10.01  | -8.502  | 0.543  | H | -9.961  | -8.509  | 0.572  |
| H | 13.961  | -1.259  | -6.612 | H | 14.024  | -1.362  | -6.511 |

|   |         |        |        |   |         |        |        |
|---|---------|--------|--------|---|---------|--------|--------|
| H | 12.679  | -2.437 | -6.283 | H | 12.748  | -2.54  | -6.162 |
| H | 12.355  | -0.713 | -6.112 | H | 12.41   | -0.814 | -6.045 |
| H | 16.722  | 0.414  | -2.794 | H | 16.732  | 0.439  | -2.714 |
| H | 17.306  | -1.239 | -2.6   | H | 17.323  | -1.203 | -2.461 |
| H | 16.556  | -0.407 | -1.233 | H | 16.552  | -0.334 | -1.13  |
| H | 14.959  | -7.568 | 0.108  | H | 14.996  | -7.434 | 0.464  |
| H | 16.235  | -6.357 | -0.006 | H | 16.262  | -6.216 | 0.317  |
| H | 15.163  | -6.636 | -1.384 | H | 15.213  | -6.562 | -1.062 |
| H | 13.317  | -5.19  | 4.161  | H | 13.281  | -4.908 | 4.395  |
| H | 13.167  | -3.433 | 4.02   | H | 13.111  | -3.16  | 4.178  |
| H | 11.749  | -4.454 | 3.798  | H | 11.708  | -4.207 | 3.981  |
| H | 1.325   | 9.288  | 7.676  | H | 1.462   | 9.278  | 7.582  |
| H | 2.606   | 9.123  | 6.464  | H | 2.714   | 9.099  | 6.341  |
| H | 1.567   | 7.75   | 6.84   | H | 1.669   | 7.737  | 6.741  |
| H | -3.281  | 10.498 | 6.136  | H | -3.166  | 10.527 | 6.148  |
| H | -2.59   | 12.024 | 5.588  | H | -2.478  | 12.048 | 5.581  |
| H | -3.475  | 11.003 | 4.45   | H | -3.397  | 11.032 | 4.466  |
| H | -2.403  | 9.85   | -2.493 | H | -2.548  | 9.866  | -2.468 |
| H | -2.23   | 11.552 | -2.95  | H | -2.353  | 11.558 | -2.953 |
| H | -0.959  | 10.394 | -3.346 | H | -1.119  | 10.368 | -3.371 |
| H | -0.354  | 14.44  | 1.199  | H | -0.355  | 14.452 | 1.116  |
| H | 0.655   | 14.545 | -0.245 | H | 0.634   | 14.536 | -0.343 |
| H | 1.341   | 13.958 | 1.279  | H | 1.338   | 13.956 | 1.176  |
| H | -9.53   | 1.542  | -8.815 | H | -9.762  | 1.628  | -8.677 |
| H | -7.848  | 1.746  | -8.316 | H | -8.068  | 1.823  | -8.218 |
| H | -8.76   | 0.344  | -7.76  | H | -8.967  | 0.412  | -7.662 |
| H | -12.097 | 5.16   | -6.742 | H | -12.284 | 5.202  | -6.473 |
| H | -10.769 | 6.166  | -6.164 | H | -10.937 | 6.205  | -5.934 |
| H | -11.93  | 5.502  | -5.011 | H | -12.056 | 5.529  | -4.746 |
| H | -14.165 | 1.513  | -0.788 | H | -14.193 | 1.472  | -0.546 |

|   |         |        |        |   |         |       |        |
|---|---------|--------|--------|---|---------|-------|--------|
| H | -13.338 | -0.022 | -1.063 | H | -13.381 | -0.06 | -0.875 |
| H | -13.637 | 1.067  | -2.42  | H | -13.707 | 1.06  | -2.2   |
| H | -9.631  | 2.736  | 2.358  | H | -9.578  | 2.576 | 2.516  |
| H | -9.542  | 4.345  | 1.639  | H | -9.487  | 4.206 | 1.845  |
| H | -11.081 | 3.742  | 2.282  | H | -11.017 | 3.6   | 2.506  |

---

**1d:**

| <i>(M)</i> - <b>1d</b> in the ground state |        |        |        | <i>(M)</i> - <b>1d</b> in the first excited state |        |        |        |
|--------------------------------------------|--------|--------|--------|---------------------------------------------------|--------|--------|--------|
| C                                          | 2.172  | -1.008 | 0.028  | C                                                 | 2.174  | -1.003 | 0.058  |
| C                                          | 0.821  | -1.415 | 0.288  | C                                                 | 0.826  | -1.405 | 0.295  |
| C                                          | -0.21  | -0.481 | 0.122  | C                                                 | -0.213 | -0.456 | 0.119  |
| C                                          | 0.118  | 0.892  | -0.16  | C                                                 | 0.121  | 0.915  | -0.166 |
| C                                          | 1.475  | 1.376  | -0.264 | C                                                 | 1.485  | 1.392  | -0.26  |
| C                                          | 2.52   | 0.34   | -0.344 | C                                                 | 2.529  | 0.347  | -0.327 |
| C                                          | -0.984 | 1.803  | -0.27  | C                                                 | -0.976 | 1.828  | -0.301 |
| C                                          | -0.735 | 3.144  | -0.155 | C                                                 | -0.717 | 3.178  | -0.217 |
| C                                          | 0.548  | 3.67   | 0.034  | C                                                 | 0.559  | 3.694  | -0.011 |
| C                                          | 1.7    | 2.83   | -0.17  | C                                                 | 1.714  | 2.838  | -0.182 |
| C                                          | -1.598 | -0.894 | 0.289  | C                                                 | -1.582 | -0.862 | 0.28   |
| C                                          | -2.664 | -0.007 | 0.005  | C                                                 | -2.652 | 0.036  | -0.008 |
| C                                          | -2.375 | 1.341  | -0.351 | C                                                 | -2.36  | 1.373  | -0.367 |
| C                                          | -1.899 | -2.215 | 0.696  | C                                                 | -1.891 | -2.19  | 0.691  |
| C                                          | -3.259 | -2.596 | 0.98   | C                                                 | -3.252 | -2.56  | 0.978  |
| C                                          | -4.27  | -1.679 | 0.712  | C                                                 | -4.257 | -1.631 | 0.721  |
| C                                          | -4.026 | -0.438 | 0.099  | C                                                 | -4.013 | -0.394 | 0.096  |
| C                                          | -5.099 | 0.425  | -0.364 | C                                                 | -5.084 | 0.463  | -0.364 |
| C                                          | -4.782 | 1.787  | -0.641 | C                                                 | -4.768 | 1.837  | -0.639 |
| C                                          | -3.421 | 2.187  | -0.654 | C                                                 | -3.421 | 2.235  | -0.657 |
| C                                          | 2.899  | -3.359 | 0.619  | C                                                 | 2.887  | -3.353 | 0.666  |
| C                                          | 3.174  | -2.021 | 0.163  | C                                                 | 3.173  | -2.014 | 0.218  |

|   |       |        |        |   |       |        |        |
|---|-------|--------|--------|---|-------|--------|--------|
| C | 4.477 | -1.773 | -0.259 | C | 4.479 | -1.777 | -0.208 |
| C | 5.479 | -2.764 | -0.061 | C | 5.472 | -2.779 | -0.019 |
| C | 5.284 | -3.955 | 0.679  | C | 5.268 | -3.977 | 0.717  |
| C | 3.925 | -4.224 | 0.994  | C | 3.921 | -4.234 | 1.039  |
| C | 6.697 | -2.569 | -0.684 | C | 6.685 | -2.598 | -0.653 |
| C | 7.786 | -3.411 | -0.629 | C | 7.77  | -3.454 | -0.606 |
| C | 7.65  | -4.541 | 0.191  | C | 7.631 | -4.584 | 0.212  |
| C | 6.43  | -4.823 | 0.855  | C | 6.415 | -4.858 | 0.886  |
| C | 4.752 | -0.557 | -0.957 | C | 4.757 | -0.571 | -0.92  |
| C | 5.983 | -0.452 | -1.677 | C | 5.985 | -0.477 | -1.644 |
| C | 6.916 | -1.469 | -1.532 | C | 6.911 | -1.502 | -1.499 |
| C | 3.849 | 0.526  | -0.897 | C | 3.853 | 0.519  | -0.873 |
| C | 4.407 | 1.762  | -1.412 | C | 4.423 | 1.75   | -1.392 |
| C | 5.455 | 1.77   | -2.326 | C | 5.471 | 1.747  | -2.303 |
| C | 6.323 | 0.646  | -2.494 | C | 6.332 | 0.616  | -2.467 |
| C | 7.602 | 0.62   | -3.152 | C | 7.608 | 0.579  | -3.125 |
| C | 8.503 | -0.46  | -2.958 | C | 8.503 | -0.508 | -2.931 |
| C | 8.162 | -1.532 | -2.127 | C | 8.156 | -1.576 | -2.1   |
| C | 8.858 | -2.847 | -1.629 | C | 8.843 | -2.896 | -1.606 |
| C | 4.241 | 2.999  | -0.629 | C | 4.259 | 2.991  | -0.615 |
| C | 2.994 | 3.512  | -0.117 | C | 3.011 | 3.515  | -0.12  |
| C | 3.071 | 4.822  | 0.433  | C | 3.091 | 4.828  | 0.419  |
| C | 4.346 | 5.434  | 0.667  | C | 4.367 | 5.434  | 0.662  |
| C | 5.582 | 4.839  | 0.342  | C | 5.603 | 4.828  | 0.354  |
| C | 5.46  | 3.616  | -0.354 | C | 5.48  | 3.6    | -0.333 |
| C | 4.396 | 6.703  | 1.234  | C | 4.418 | 6.707  | 1.217  |
| C | 5.535 | 7.425  | 1.532  | C | 5.559 | 7.426  | 1.519  |
| C | 6.764 | 6.822  | 1.234  | C | 6.788 | 6.813  | 1.238  |
| C | 6.805 | 5.539  | 0.648  | C | 6.827 | 5.525  | 0.664  |
| C | 1.886 | 5.587  | 0.751  | C | 1.905 | 5.606  | 0.712  |

|   |        |        |        |   |        |        |        |
|---|--------|--------|--------|---|--------|--------|--------|
| C | 1.971  | 6.914  | 1.285  | C | 1.994  | 6.937  | 1.235  |
| C | 3.233  | 7.434  | 1.529  | C | 3.257  | 7.45   | 1.491  |
| C | 0.628  | 5.044  | 0.498  | C | 0.647  | 5.073  | 0.444  |
| C | -0.512 | 5.861  | 0.824  | C | -0.49  | 5.903  | 0.745  |
| C | -0.417 | 7.133  | 1.334  | C | -0.392 | 7.179  | 1.246  |
| C | 0.858  | 7.742  | 1.569  | C | 0.884  | 7.778  | 1.495  |
| C | 1.116  | 9.061  | 2.084  | C | 1.146  | 9.1    | 2.002  |
| C | 2.436  | 9.512  | 2.315  | C | 2.466  | 9.544  | 2.245  |
| C | 3.529  | 8.689  | 2.022  | C | 3.557  | 8.708  | 1.973  |
| C | 5.087  | 8.816  | 2.093  | C | 5.114  | 8.826  | 2.059  |
| C | -4.866 | -4.425 | 1.78   | C | -4.868 | -4.383 | 1.754  |
| C | -3.558 | -3.951 | 1.429  | C | -3.559 | -3.911 | 1.42   |
| C | -2.519 | -4.892 | 1.427  | C | -2.516 | -4.864 | 1.429  |
| C | -2.83  | -6.269 | 1.663  | C | -2.84  | -6.24  | 1.652  |
| C | -4.134 | -6.759 | 1.918  | C | -4.153 | -6.724 | 1.874  |
| C | -5.148 | -5.751 | 2.027  | C | -5.161 | -5.712 | 1.983  |
| C | -1.804 | -7.196 | 1.516  | C | -1.817 | -7.173 | 1.517  |
| C | -1.925 | -8.571 | 1.583  | C | -1.953 | -8.555 | 1.56   |
| C | -3.208 | -9.067 | 1.854  | C | -3.24  | -9.042 | 1.79   |
| C | -4.302 | -8.185 | 2.013  | C | -4.335 | -8.15  | 1.936  |
| C | -1.165 | -4.504 | 1.096  | C | -1.169 | -4.484 | 1.118  |
| C | -0.152 | -5.484 | 0.924  | C | -0.156 | -5.472 | 0.959  |
| C | -0.511 | -6.815 | 1.102  | C | -0.523 | -6.797 | 1.127  |
| C | -0.852 | -3.172 | 0.792  | C | -0.852 | -3.143 | 0.797  |
| C | 0.516  | -2.806 | 0.56   | C | 0.513  | -2.783 | 0.563  |
| C | 1.527  | -3.798 | 0.563  | C | 1.53   | -3.786 | 0.593  |
| C | 1.162  | -5.195 | 0.48   | C | 1.158  | -5.19  | 0.512  |
| C | 1.922  | -6.315 | -0.057 | C | 1.904  | -6.3   | -0.035 |
| C | 1.48   | -7.64  | 0.146  | C | 1.457  | -7.641 | 0.166  |
| C | 0.262  | -7.909 | 0.786  | C | 0.248  | -7.906 | 0.797  |

|   |         |        |        |   |         |        |        |
|---|---------|--------|--------|---|---------|--------|--------|
| C | -0.542  | -9.19  | 1.184  | C | -0.567  | -9.183 | 1.184  |
| C | -5.616  | 4.165  | -1.092 | C | -5.632  | 4.209  | -1.075 |
| C | -5.833  | 2.761  | -0.871 | C | -5.835  | 2.805  | -0.862 |
| C | -7.168  | 2.326  | -0.834 | C | -7.164  | 2.355  | -0.829 |
| C | -8.216  | 3.289  | -0.982 | C | -8.222  | 3.308  | -0.97  |
| C | -8.009  | 4.679  | -1.155 | C | -8.029  | 4.702  | -1.136 |
| C | -6.634  | 5.08   | -1.228 | C | -6.66   | 5.116  | -1.208 |
| C | -9.525  | 2.822  | -0.992 | C | -9.527  | 2.829  | -0.978 |
| C | -10.665 | 3.584  | -1.15  | C | -10.676 | 3.581  | -1.124 |
| C | -10.475 | 4.962  | -1.303 | C | -10.499 | 4.963  | -1.272 |
| C | -9.172  | 5.515  | -1.294 | C | -9.203  | 5.528  | -1.267 |
| C | -7.479  | 0.921  | -0.707 | C | -7.465  | 0.946  | -0.707 |
| C | -8.84   | 0.483  | -0.764 | C | -8.82   | 0.496  | -0.756 |
| C | -9.829  | 1.451  | -0.896 | C | -9.82   | 1.455  | -0.881 |
| C | -6.458  | -0.039 | -0.555 | C | -6.435  | -0.007 | -0.559 |
| C | -6.868  | -1.417 | -0.69  | C | -6.834  | -1.389 | -0.696 |
| C | -8.179  | -1.821 | -0.756 | C | -8.141  | -1.804 | -0.752 |
| C | -9.25   | -0.871 | -0.722 | C | -9.22   | -0.862 | -0.708 |
| C | -10.66  | -1.148 | -0.751 | C | -10.627 | -1.151 | -0.719 |
| C | -11.608 | -0.108 | -0.893 | C | -11.586 | -0.119 | -0.856 |
| C | -11.189 | 1.225  | -0.99  | C | -11.178 | 1.217  | -0.962 |
| C | -11.893 | 2.613  | -1.158 | C | -11.895 | 2.6    | -1.123 |
| C | -12.082 | -5.164 | -0.295 | C | -11.977 | -5.186 | -0.215 |
| C | -12.582 | -4.376 | -1.341 | C | -12.505 | -4.415 | -1.259 |
| C | -12.108 | -3.07  | -1.483 | C | -12.058 | -3.101 | -1.416 |
| C | -11.145 | -2.545 | -0.606 | C | -11.093 | -2.552 | -0.556 |
| C | -10.671 | -3.359 | 0.433  | C | -10.592 | -3.35  | 0.484  |
| C | -11.128 | -4.671 | 0.6    | C | -11.022 | -4.669 | 0.666  |
| C | -10.594 | -5.521 | 1.729  | C | -10.458 | -5.501 | 1.795  |
| C | -13.589 | -4.945 | -2.313 | C | -13.514 | -5.009 | -2.214 |

|   |        |         |        |   |        |         |        |
|---|--------|---------|--------|---|--------|---------|--------|
| C | -8.163 | -9.961  | 2.56   | C | -8.229 | -9.895  | 2.308  |
| C | -7.978 | -9.038  | 1.521  | C | -8.004 | -8.936  | 1.311  |
| C | -6.72  | -8.453  | 1.363  | C | -6.735 | -8.362  | 1.211  |
| C | -5.65  | -8.781  | 2.215  | C | -5.693 | -8.737  | 2.078  |
| C | -5.867 | -9.717  | 3.233  | C | -5.948 | -9.711  | 3.052  |
| C | -7.119 | -10.315 | 3.418  | C | -7.212 | -10.297 | 3.18   |
| C | -7.324 | -11.335 | 4.514  | C | -7.462 | -11.355 | 4.229  |
| C | -9.108 | -8.72   | 0.57   | C | -9.1   | -8.569  | 0.338  |
| C | -1.302 | -12.037 | -1.976 | C | -1.294 | -12.035 | -1.979 |
| C | -0.937 | -10.734 | -2.315 | C | -0.931 | -10.73  | -2.317 |
| C | -0.667 | -9.82   | -1.286 | C | -0.672 | -9.815  | -1.286 |
| C | -0.754 | -10.198 | 0.053  | C | -0.766 | -10.194 | 0.053  |
| C | -1.125 | -11.515 | 0.365  | C | -1.136 | -11.511 | 0.363  |
| C | -1.405 | -12.443 | -0.638 | C | -1.406 | -12.44  | -0.642 |
| C | -1.822 | -13.855 | -0.299 | C | -1.821 | -13.853 | -0.305 |
| C | -0.846 | -10.294 | -3.758 | C | -0.832 | -10.291 | -3.759 |
| C | 1.894  | -10.61  | 4.465  | C | 1.8    | -10.607 | 4.514  |
| C | 2.306  | -10.826 | 3.144  | C | 2.237  | -10.825 | 3.201  |
| C | 1.464  | -10.417 | 2.108  | C | 1.417  | -10.414 | 2.149  |
| C | 0.243  | -9.783  | 2.369  | C | 0.193  | -9.776  | 2.385  |
| C | -0.149 | -9.59   | 3.695  | C | -0.224 | -9.58   | 3.703  |
| C | 0.667  | -10.004 | 4.756  | C | 0.569  | -9.997  | 4.78   |
| C | 0.217  | -9.817  | 6.185  | C | 0.091  | -9.806  | 6.2    |
| C | 3.646  | -11.449 | 2.828  | C | 3.581  | -11.453 | 2.913  |
| C | 5.216  | -5.673  | -2.743 | C | 5.199  | -5.664  | -2.716 |
| C | 5.229  | -6.794  | -1.908 | C | 5.208  | -6.787  | -1.884 |
| C | 4.169  | -6.985  | -1.015 | C | 4.145  | -6.979  | -0.994 |
| C | 3.068  | -6.112  | -0.994 | C | 3.048  | -6.101  | -0.971 |
| C | 3.053  | -5.045  | -1.909 | C | 3.036  | -5.031  | -1.883 |
| C | 4.135  | -4.786  | -2.751 | C | 4.12   | -4.774  | -2.723 |

|   |        |        |        |   |        |        |        |
|---|--------|--------|--------|---|--------|--------|--------|
| C | 4.166  | -3.548 | -3.615 | C | 4.156  | -3.534 | -3.585 |
| C | 6.377  | -7.771 | -1.999 | C | 6.354  | -7.766 | -1.974 |
| C | 6.014  | -8.449 | 3.115  | C | 6.005  | -8.481 | 3.152  |
| C | 6.852  | -8.426 | 1.995  | C | 6.843  | -8.457 | 2.032  |
| C | 6.99   | -7.231 | 1.285  | C | 6.979  | -7.263 | 1.32   |
| C | 6.32   | -6.058 | 1.671  | C | 6.305  | -6.09  | 1.702  |
| C | 5.525  | -6.11  | 2.832  | C | 5.507  | -6.144 | 2.862  |
| C | 5.344  | -7.298 | 3.545  | C | 5.331  | -7.33  | 3.578  |
| C | 4.426  | -7.36  | 4.744  | C | 4.413  | -7.392 | 4.777  |
| C | 7.596  | -9.669 | 1.565  | C | 7.589  | -9.699 | 1.603  |
| C | 9.008  | -6.032 | -4.553 | C | 8.974  | -6.073 | -4.54  |
| C | 9.731  | -6.15  | -3.358 | C | 9.694  | -6.2   | -3.343 |
| C | 9.717  | -5.082 | -2.459 | C | 9.685  | -5.136 | -2.441 |
| C | 8.985  | -3.916 | -2.726 | C | 8.962  | -3.963 | -2.705 |
| C | 8.28   | -3.822 | -3.927 | C | 8.262  | -3.861 | -3.908 |
| C | 8.281  | -4.877 | -4.851 | C | 8.257  | -4.911 | -4.836 |
| C | 7.463  | -4.777 | -6.117 | C | 7.443  | -4.8   | -6.103 |
| C | 10.473 | -7.425 | -3.033 | C | 10.426 | -7.482 | -3.021 |
| C | 12.564 | -1.465 | 0.102  | C | 12.558 | -1.539 | 0.125  |
| C | 12.515 | -1.774 | -1.262 | C | 12.51  | -1.854 | -1.238 |
| C | 11.32  | -2.266 | -1.796 | C | 11.312 | -2.338 | -1.772 |
| C | 10.191 | -2.451 | -0.99  | C | 10.179 | -2.51  | -0.967 |
| C | 10.269 | -2.142 | 0.37   | C | 10.257 | -2.194 | 0.392  |
| C | 11.451 | -1.643 | 0.931  | C | 11.442 | -1.703 | 0.952  |
| C | 11.504 | -1.263 | 2.391  | C | 11.495 | -1.316 | 2.411  |
| C | 13.737 | -1.611 | -2.135 | C | 13.735 | -1.707 | -2.109 |
| C | 8.888  | 3.938  | -5.53  | C | 8.921  | 3.889  | -5.498 |
| C | 9.76   | 3.393  | -4.581 | C | 9.787  | 3.339  | -4.547 |
| C | 9.321  | 2.315  | -3.808 | C | 9.341  | 2.262  | -3.777 |
| C | 8.041  | 1.768  | -3.982 | C | 8.057  | 1.723  | -3.954 |

|   |        |        |        |   |        |        |        |
|---|--------|--------|--------|---|--------|--------|--------|
| C | 7.193  | 2.333  | -4.948 | C | 7.215  | 2.294  | -4.922 |
| C | 7.601  | 3.422  | -5.723 | C | 7.632  | 3.382  | -5.695 |
| C | 6.66   | 4.048  | -6.726 | C | 6.698  | 4.014  | -6.7   |
| C | 11.156 | 3.94   | -4.403 | C | 11.186 | 3.877  | -4.364 |
| C | 10.557 | 3.83   | -0.535 | C | 10.576 | 3.791  | -0.496 |
| C | 9.612  | 3.014  | 0.1    | C | 9.625  | 2.983  | 0.14   |
| C | 8.416  | 3.593  | 0.53   | C | 8.43   | 3.571  | 0.565  |
| C | 8.118  | 4.945  | 0.28   | C | 8.14   | 4.923  | 0.307  |
| C | 9.087  | 5.728  | -0.365 | C | 9.115  | 5.698  | -0.339 |
| C | 10.314 | 5.188  | -0.763 | C | 10.341 | 5.15   | -0.731 |
| C | 11.334 | 6.063  | -1.456 | C | 11.366 | 6.015  | -1.425 |
| C | 9.853  | 1.533  | 0.277  | C | 9.857  | 1.501  | 0.323  |
| C | 6.013  | 9.521  | 6.261  | C | 6.003  | 9.577  | 6.227  |
| C | 5.58   | 10.584 | 5.453  | C | 5.589  | 10.634 | 5.4    |
| C | 5.318  | 10.335 | 4.107  | C | 5.338  | 10.369 | 4.055  |
| C | 5.474  | 9.051  | 3.56   | C | 5.488  | 9.077  | 3.526  |
| C | 5.904  | 8.014  | 4.385  | C | 5.9    | 8.047  | 4.37   |
| C | 6.18   | 8.237  | 5.744  | C | 6.164  | 8.285  | 5.728  |
| C | 6.661  | 7.097  | 6.61   | C | 6.621  | 7.151  | 6.615  |
| C | 5.409  | 11.965 | 6.04   | C | 5.425  | 12.024 | 5.967  |
| C | 6.827  | 11.715 | -0.61  | C | 6.898  | 11.68  | -0.662 |
| C | 7.596  | 11.193 | 0.439  | C | 7.654  | 11.166 | 0.4    |
| C | 6.999  | 10.288 | 1.319  | C | 7.044  | 10.276 | 1.285  |
| C | 5.663  | 9.894  | 1.161  | C | 5.706  | 9.888  | 1.12   |
| C | 4.923  | 10.425 | 0.105  | C | 4.979  | 10.412 | 0.05   |
| C | 5.493  | 11.343 | -0.788 | C | 5.563  | 11.315 | -0.848 |
| C | 4.66   | 11.936 | -1.9   | C | 4.744  | 11.899 | -1.976 |
| C | 9.047  | 11.581 | 0.596  | C | 9.106  | 11.547 | 0.565  |
| C | -2.085 | 11.769 | 2.972  | C | -2.046 | 11.839 | 2.829  |
| C | -1.092 | 11.54  | 3.93   | C | -1.065 | 11.612 | 3.8    |

|   |         |        |        |   |         |        |        |
|---|---------|--------|--------|---|---------|--------|--------|
| C | -0.061  | 10.646 | 3.626  | C | -0.036  | 10.708 | 3.515  |
| C | -0.003  | 9.992  | 2.387  | C | 0.03    | 10.043 | 2.283  |
| C | -1.007  | 10.259 | 1.441  | C | -0.962  | 10.307 | 1.324  |
| C | -2.056  | 11.136 | 1.723  | C | -2.009  | 11.194 | 1.587  |
| C | -3.155  | 11.378 | 0.714  | C | -3.096  | 11.433 | 0.565  |
| C | -1.119  | 12.258 | 5.26   | C | -1.1    | 12.343 | 5.122  |
| C | -8.827  | 9.766  | -1.713 | C | -8.898  | 9.784  | -1.665 |
| C | -8.137  | 9.126  | -0.676 | C | -8.194  | 9.145  | -0.637 |
| C | -8.256  | 7.74   | -0.549 | C | -8.3    | 7.757  | -0.516 |
| C | -9.035  | 6.988  | -1.444 | C | -9.08   | 7.003  | -1.409 |
| C | -9.714  | 7.661  | -2.47  | C | -9.773  | 7.676  | -2.425 |
| C | -9.619  | 9.049  | -2.616 | C | -9.692  | 9.065  | -2.565 |
| C | -10.329 | 9.75   | -3.751 | C | -10.417 | 9.766  | -3.689 |
| C | -7.267  | 9.918  | 0.272  | C | -7.322  | 9.938  | 0.308  |
| C | -13.795 | 3.237  | -4.996 | C | -13.834 | 3.209  | -4.945 |
| C | -12.935 | 2.149  | -4.84  | C | -12.967 | 2.126  | -4.795 |
| C | -12.342 | 1.932  | -3.588 | C | -12.361 | 1.914  | -3.548 |
| C | -12.604 | 2.778  | -2.51  | C | -12.619 | 2.759  | -2.469 |
| C | -13.475 | 3.862  | -2.696 | C | -13.498 | 3.838  | -2.648 |
| C | -14.077 | 4.104  | -3.931 | C | -14.112 | 4.075  | -3.877 |
| C | -15.034 | 5.258  | -4.115 | C | -15.078 | 5.223  | -4.054 |
| C | -12.654 | 1.202  | -5.983 | C | -12.69  | 1.181  | -5.94  |
| C | -14.58  | 3.01   | 2.211  | C | -14.558 | 2.974  | 2.268  |
| C | -14.974 | 2.265  | 1.089  | C | -14.955 | 2.226  | 1.148  |
| C | -14.1   | 2.176  | 0.007  | C | -14.09  | 2.145  | 0.059  |
| C | -12.849 | 2.812  | 0.027  | C | -12.843 | 2.79   | 0.069  |
| C | -12.482 | 3.543  | 1.155  | C | -12.473 | 3.524  | 1.195  |
| C | -13.343 | 3.652  | 2.258  | C | -13.326 | 3.625  | 2.306  |
| C | -12.92  | 4.457  | 3.465  | C | -12.899 | 4.431  | 3.51   |
| C | -16.324 | 1.588  | 1.06   | C | -16.301 | 1.54   | 1.129  |

|   |         |         |        |   |         |         |        |
|---|---------|---------|--------|---|---------|---------|--------|
| H | -1.573  | 3.818   | -0.112 | H | -1.553  | 3.857   | -0.194 |
| H | -5.284  | -1.935  | 0.971  | H | -5.271  | -1.873  | 0.995  |
| H | -3.199  | 3.204   | -0.943 | H | -3.198  | 3.253   | -0.941 |
| H | 3.655   | -5.178  | 1.42   | H | 3.64    | -5.182  | 1.473  |
| H | 8.483   | -5.221  | 0.333  | H | 8.461   | -5.268  | 0.348  |
| H | 5.766   | 2.726   | -2.731 | H | 5.791   | 2.7     | -2.708 |
| H | 9.462   | -0.426  | -3.464 | H | 9.462   | -0.482  | -3.44  |
| H | 6.358   | 3.127   | -0.695 | H | 6.377   | 3.103   | -0.664 |
| H | 7.701   | 7.328   | 1.447  | H | 7.725   | 7.317   | 1.453  |
| H | -1.512  | 5.463   | 0.702  | H | -1.491  | 5.511   | 0.612  |
| H | -1.325  | 7.671   | 1.58   | H | -1.299  | 7.725   | 1.475  |
| H | 2.578   | 10.52   | 2.693  | H | 2.611   | 10.554  | 2.613  |
| H | -5.681  | -3.714  | 1.858  | H | -5.683  | -3.67   | 1.824  |
| H | -6.16   | -6.035  | 2.294  | H | -6.179  | -5.992  | 2.232  |
| H | -3.401  | -10.135 | 1.878  | H | -3.445  | -10.109 | 1.785  |
| H | 2.056   | -8.445  | -0.297 | H | 2.041   | -8.443  | -0.272 |
| H | -4.601  | 4.54    | -1.155 | H | -4.62   | 4.593   | -1.132 |
| H | -6.387  | 6.12    | -1.408 | H | -6.422  | 6.158   | -1.382 |
| H | -11.319 | 5.636   | -1.416 | H | -11.35  | 5.628   | -1.376 |
| H | -6.105  | -2.176  | -0.806 | H | -6.063  | -2.139  | -0.817 |
| H | -8.401  | -2.875  | -0.881 | H | -8.355  | -2.859  | -0.878 |
| H | -12.662 | -0.367  | -0.897 | H | -12.638 | -0.388  | -0.846 |
| H | -12.449 | -6.182  | -0.174 | H | -12.323 | -6.209  | -0.083 |
| H | -12.476 | -2.45   | -2.295 | H | -12.447 | -2.493  | -2.228 |
| H | -9.949  | -2.952  | 1.135  | H | -9.868  | -2.924  | 1.173  |
| H | -9.555  | -5.82   | 1.548  | H | -9.421  | -5.797  | 1.595  |
| H | -10.609 | -4.974  | 2.678  | H | -10.457 | -4.942  | 2.736  |
| H | -11.18  | -6.435  | 1.858  | H | -11.034 | -6.417  | 1.947  |
| H | -14.132 | -4.154  | -2.838 | H | -14.077 | -4.232  | -2.739 |
| H | -13.098 | -5.566  | -3.072 | H | -13.02  | -5.628  | -2.974 |

|   |         |         |        |   |         |         |        |
|---|---------|---------|--------|---|---------|---------|--------|
| H | -14.323 | -5.578  | -1.803 | H | -14.229 | -5.651  | -1.69  |
| H | -9.142  | -10.415 | 2.698  | H | -9.217  | -10.341 | 2.403  |
| H | -6.554  | -7.749  | 0.554  | H | -6.538  | -7.63   | 0.434  |
| H | -5.047  | -9.967  | 3.902  | H | -5.15   | -9.998  | 3.732  |
| H | -6.797  | -11.049 | 5.43   | H | -6.934  | -11.127 | 5.161  |
| H | -8.384  | -11.456 | 4.758  | H | -8.527  | -11.452 | 4.458  |
| H | -6.941  | -12.318 | 4.214  | H | -7.109  | -12.337 | 3.889  |
| H | -8.933  | -7.785  | 0.031  | H | -8.936  | -7.585  | -0.109 |
| H | -9.225  | -9.513  | -0.178 | H | -9.154  | -9.297  | -0.482 |
| H | -10.062 | -8.63   | 1.099  | H | -10.08  | -8.557  | 0.825  |
| H | -1.506  | -12.757 | -2.767 | H | -1.491  | -12.755 | -2.771 |
| H | -0.384  | -8.803  | -1.54  | H | -0.391  | -8.798  | -1.539 |
| H | -1.18   | -11.818 | 1.407  | H | -1.197  | -11.814 | 1.405  |
| H | -2.878  | -14.023 | -0.541 | H | -2.874  | -14.026 | -0.557 |
| H | -1.241  | -14.59  | -0.867 | H | -1.232  | -14.586 | -0.867 |
| H | -1.688  | -14.069 | 0.765  | H | -1.696  | -14.066 | 0.761  |
| H | -0.851  | -11.148 | -4.441 | H | -0.826  | -11.145 | -4.441 |
| H | -1.693  | -9.65   | -4.025 | H | -1.68   | -9.652  | -4.033 |
| H | 0.066   | -9.716  | -3.941 | H | 0.079   | -9.708  | -3.935 |
| H | 2.541   | -10.923 | 5.282  | H | 2.429   | -10.921 | 5.344  |
| H | 1.769   | -10.577 | 1.078  | H | 1.743   | -10.575 | 1.124  |
| H | -1.093  | -9.097  | 3.908  | H | -1.17   | -9.083  | 3.897  |
| H | -0.4    | -8.92   | 6.296  | H | -0.506  | -8.894  | 6.301  |
| H | -0.385  | -10.67  | 6.524  | H | -0.54   | -10.645 | 6.519  |
| H | 1.069   | -9.729  | 6.866  | H | 0.929   | -9.742  | 6.9    |
| H | 4.132   | -11.837 | 3.728  | H | 4.052   | -11.834 | 3.823  |
| H | 3.544   | -12.275 | 2.116  | H | 3.488   | -12.285 | 2.206  |
| H | 4.318   | -10.71  | 2.377  | H | 4.262   | -10.72  | 2.466  |
| H | 6.069   | -5.486  | -3.39  | H | 6.052   | -5.479  | -3.363 |
| H | 4.22    | -7.803  | -0.302 | H | 4.194   | -7.799  | -0.283 |

|   |        |        |        |   |        |         |        |
|---|--------|--------|--------|---|--------|---------|--------|
| H | 2.199  | -4.375 | -1.929 | H | 2.184  | -4.36   | -1.902 |
| H | 4.648  | -3.74  | -4.579 | H | 4.646  | -3.723  | -4.545 |
| H | 3.16   | -3.162 | -3.805 | H | 3.151  | -3.149  | -3.781 |
| H | 4.734  | -2.751 | -3.121 | H | 4.719  | -2.738  | -3.083 |
| H | 7.339  | -7.249 | -1.959 | H | 7.317  | -7.246  | -1.93  |
| H | 6.343  | -8.511 | -1.196 | H | 6.318  | -8.507  | -1.173 |
| H | 6.349  | -8.31  | -2.954 | H | 6.328  | -8.303  | -2.931 |
| H | 5.883  | -9.378 | 3.666  | H | 5.876  | -9.408  | 3.705  |
| H | 7.602  | -7.222 | 0.391  | H | 7.592  | -7.255  | 0.427  |
| H | 5.039  | -5.207 | 3.185  | H | 5.019  | -5.242  | 3.214  |
| H | 3.57   | -8.016 | 4.543  | H | 3.554  | -8.044  | 4.575  |
| H | 4.943  | -7.765 | 5.621  | H | 4.929  | -7.801  | 5.653  |
| H | 4.038  | -6.373 | 5.007  | H | 4.028  | -6.404  | 5.042  |
| H | 6.994  | -10.57 | 1.723  | H | 6.988  | -10.601 | 1.76   |
| H | 7.871  | -9.627 | 0.507  | H | 7.867  | -9.657  | 0.546  |
| H | 8.522  | -9.793 | 2.139  | H | 8.515  | -9.822  | 2.18   |
| H | 9.013  | -6.857 | -5.262 | H | 8.975  | -6.896  | -5.252 |
| H | 10.28  | -5.153 | -1.532 | H | 10.246 | -5.214  | -1.513 |
| H | 7.71   | -2.926 | -4.147 | H | 7.698  | -2.959  | -4.126 |
| H | 7.424  | -3.748 | -6.488 | H | 7.422  | -3.772  | -6.477 |
| H | 6.429  | -5.097 | -5.936 | H | 6.404  | -5.103  | -5.924 |
| H | 7.867  | -5.412 | -6.911 | H | 7.838  | -5.444  | -6.895 |
| H | 10.92  | -7.869 | -3.927 | H | 10.871 | -7.927  | -3.916 |
| H | 11.271 | -7.251 | -2.304 | H | 11.223 | -7.317  | -2.29  |
| H | 9.793  | -8.172 | -2.604 | H | 9.739  | -8.225  | -2.596 |
| H | 13.488 | -1.08  | 0.528  | H | 13.485 | -1.16   | 0.552  |
| H | 11.267 | -2.513 | -2.853 | H | 11.258 | -2.59   | -2.827 |
| H | 9.395  | -2.278 | 0.999  | H | 9.38   | -2.318  | 1.019  |
| H | 11.213 | -0.214 | 2.529  | H | 11.213 | -0.265  | 2.544  |
| H | 10.819 | -1.872 | 2.989  | H | 10.804 | -1.917  | 3.01   |

|   |        |        |        |   |        |        |        |
|---|--------|--------|--------|---|--------|--------|--------|
| H | 12.512 | -1.379 | 2.802  | H | 12.501 | -1.439 | 2.824  |
| H | 14.377 | -0.797 | -1.783 | H | 14.382 | -0.897 | -1.758 |
| H | 14.345 | -2.525 | -2.137 | H | 14.334 | -2.626 | -2.106 |
| H | 13.462 | -1.403 | -3.174 | H | 13.464 | -1.499 | -3.149 |
| H | 9.216  | 4.784  | -6.13  | H | 9.257  | 4.734  | -6.096 |
| H | 9.97   | 1.91   | -3.037 | H | 9.985  | 1.852  | -3.005 |
| H | 6.205  | 1.906  | -5.098 | H | 6.225  | 1.875  | -5.074 |
| H | 6.082  | 4.859  | -6.267 | H | 6.123  | 4.828  | -6.242 |
| H | 7.204  | 4.475  | -7.574 | H | 7.247  | 4.439  | -7.546 |
| H | 5.945  | 3.317  | -7.115 | H | 5.979  | 3.289  | -7.091 |
| H | 11.878 | 3.381  | -5.012 | H | 11.908 | 3.31   | -4.965 |
| H | 11.219 | 4.99   | -4.704 | H | 11.258 | 4.925  | -4.67  |
| H | 11.477 | 3.865  | -3.361 | H | 11.5   | 3.806  | -3.319 |
| H | 11.503 | 3.396  | -0.854 | H | 11.521 | 3.351  | -0.81  |
| H | 7.698  | 2.981  | 1.068  | H | 7.708  | 2.965  | 1.104  |
| H | 8.867  | 6.77   | -0.582 | H | 8.901  | 6.74   | -0.562 |
| H | 12.304 | 5.565  | -1.536 | H | 12.335 | 5.513  | -1.498 |
| H | 11.009 | 6.317  | -2.472 | H | 11.047 | 6.265  | -2.443 |
| H | 11.48  | 7.005  | -0.918 | H | 11.515 | 6.96   | -0.892 |
| H | 9.434  | 1.166  | 1.219  | H | 9.428  | 1.138  | 1.263  |
| H | 9.374  | 0.962  | -0.528 | H | 9.382  | 0.93   | -0.485 |
| H | 10.917 | 1.28   | 0.257  | H | 10.92  | 1.244  | 0.313  |
| H | 6.225  | 9.704  | 7.312  | H | 6.206  | 9.773  | 7.278  |
| H | 4.998  | 11.149 | 3.464  | H | 5.031  | 11.178 | 3.398  |
| H | 6.026  | 7.016  | 3.976  | H | 6.017  | 7.043  | 3.975  |
| H | 6      | 6.227  | 6.523  | H | 5.927  | 6.305  | 6.564  |
| H | 7.663  | 6.768  | 6.309  | H | 7.603  | 6.778  | 6.303  |
| H | 6.707  | 7.383  | 7.664  | H | 6.698  | 7.462  | 7.66   |
| H | 6.353  | 12.343 | 6.448  | H | 6.372  | 12.404 | 6.368  |
| H | 5.059  | 12.68  | 5.29   | H | 5.078  | 12.729 | 5.207  |

|   |         |        |        |   |         |        |        |
|---|---------|--------|--------|---|---------|--------|--------|
| H | 4.684   | 11.959 | 6.863  | H | 4.701   | 12.034 | 6.79   |
| H | 7.279   | 12.427 | -1.297 | H | 7.361   | 12.382 | -1.354 |
| H | 7.577   | 9.888  | 2.148  | H | 7.611   | 9.882  | 2.123  |
| H | 3.888   | 10.125 | -0.031 | H | 3.944   | 10.117 | -0.092 |
| H | 4.001   | 11.186 | -2.348 | H | 4.098   | 11.142 | -2.431 |
| H | 4.019   | 12.744 | -1.524 | H | 4.093   | 12.704 | -1.614 |
| H | 5.286   | 12.356 | -2.693 | H | 5.38    | 12.319 | -2.761 |
| H | 9.208   | 12.636 | 0.352  | H | 9.276   | 12.598 | 0.312  |
| H | 9.4     | 11.411 | 1.617  | H | 9.449   | 11.385 | 1.591  |
| H | 9.686   | 10.993 | -0.075 | H | 9.748   | 10.948 | -0.094 |
| H | -2.897  | 12.456 | 3.201  | H | -2.856  | 12.532 | 3.044  |
| H | 0.704   | 10.435 | 4.369  | H | 0.72    | 10.499 | 4.268  |
| H | -0.955  | 9.782  | 0.466  | H | -0.903  | 9.82   | 0.354  |
| H | -2.827  | 11.14  | -0.302 | H | -2.762  | 11.173 | -0.444 |
| H | -4.032  | 10.754 | 0.931  | H | -3.982  | 10.824 | 0.784  |
| H | -3.491  | 12.42  | 0.727  | H | -3.418  | 12.479 | 0.558  |
| H | -0.54   | 13.188 | 5.216  | H | -0.519  | 13.272 | 5.074  |
| H | -2.14   | 12.522 | 5.553  | H | -2.122  | 12.612 | 5.405  |
| H | -0.686  | 11.643 | 6.055  | H | -0.675  | 11.735 | 5.926  |
| H | -8.748  | 10.846 | -1.817 | H | -8.829  | 10.866 | -1.763 |
| H | -7.755  | 7.233  | 0.271  | H | -7.788  | 7.25   | 0.297  |
| H | -10.313 | 7.087  | -3.172 | H | -10.373 | 7.1    | -3.126 |
| H | -11.275 | 9.257  | -3.996 | H | -11.357 | 9.263  | -3.935 |
| H | -10.543 | 10.795 | -3.506 | H | -10.645 | 10.806 | -3.433 |
| H | -9.716  | 9.746  | -4.66  | H | -9.808  | 9.78   | -4.602 |
| H | -7.696  | 10.903 | 0.484  | H | -7.75   | 10.924 | 0.518  |
| H | -7.131  | 9.396  | 1.224  | H | -7.185  | 9.418  | 1.261  |
| H | -6.27   | 10.085 | -0.156 | H | -6.325  | 10.102 | -0.121 |
| H | -14.257 | 3.417  | -5.965 | H | -14.306 | 3.386  | -5.91  |
| H | -11.664 | 1.094  | -3.46  | H | -11.677 | 1.08   | -3.426 |

|   |         |       |        |   |         |       |        |
|---|---------|-------|--------|---|---------|-------|--------|
| H | -13.69  | 4.52  | -1.858 | H | -13.71  | 4.495 | -1.808 |
| H | -14.915 | 6.008 | -3.328 | H | -14.962 | 5.971 | -3.264 |
| H | -14.883 | 5.752 | -5.08  | H | -14.932 | 5.723 | -5.018 |
| H | -16.075 | 4.915 | -4.087 | H | -16.117 | 4.873 | -4.026 |
| H | -12.952 | 1.631 | -6.944 | H | -12.993 | 1.61  | -6.9   |
| H | -11.59  | 0.951 | -6.039 | H | -11.626 | 0.93  | -6.001 |
| H | -13.201 | 0.26  | -5.858 | H | -13.236 | 0.238 | -5.814 |
| H | -15.255 | 3.089 | 3.06   | H | -15.227 | 3.047 | 3.123  |
| H | -14.397 | 1.617 | -0.876 | H | -14.39  | 1.584 | -0.822 |
| H | -11.516 | 4.037 | 1.184  | H | -11.511 | 4.025 | 1.217  |
| H | -12.732 | 5.503 | 3.197  | H | -12.71  | 5.476 | 3.24   |
| H | -13.684 | 4.443 | 4.247  | H | -13.66  | 4.418 | 4.294  |
| H | -11.991 | 4.065 | 3.895  | H | -11.969 | 4.039 | 3.938  |
| H | -17.137 | 2.325 | 1.072  | H | -17.119 | 2.271 | 1.141  |
| H | -16.446 | 0.972 | 0.165  | H | -16.423 | 0.92  | 0.237  |
| H | -16.464 | 0.943 | 1.935  | H | -16.432 | 0.899 | 2.007  |

**9** and **10** in the first excited state:

| $(M, M)$ - <b>9</b> in the first excited state |        |        |        | $(M, M)$ - <b>10</b> in the first excited state |        |        |        |
|------------------------------------------------|--------|--------|--------|-------------------------------------------------|--------|--------|--------|
| C                                              | -2.851 | 2.459  | -0.007 | C                                               | 2.851  | 2.463  | -0.036 |
| C                                              | -1.465 | 2.433  | 0.129  | C                                               | 1.462  | 2.43   | -0.169 |
| C                                              | -0.722 | 1.241  | 0.016  | C                                               | 0.722  | 1.243  | -0.027 |
| C                                              | -1.434 | 0      | 0      | C                                               | 1.435  | 0      | 0      |
| C                                              | -2.863 | 0      | 0      | C                                               | 2.858  | 0      | 0      |
| C                                              | -3.542 | 1.239  | -0.282 | C                                               | 3.542  | 1.244  | 0.266  |
| C                                              | -0.722 | -1.241 | -0.016 | C                                               | 0.722  | -1.243 | 0.027  |
| C                                              | -1.465 | -2.433 | -0.129 | C                                               | 1.462  | -2.43  | 0.169  |
| C                                              | -2.851 | -2.459 | 0.007  | C                                               | 2.851  | -2.463 | 0.036  |
| C                                              | -3.542 | -1.239 | 0.282  | C                                               | 3.542  | -1.244 | -0.266 |
| C                                              | 0.722  | 1.241  | -0.016 | C                                               | -0.722 | 1.243  | 0.027  |

|   |        |        |        |   |        |        |        |
|---|--------|--------|--------|---|--------|--------|--------|
| C | 1.434  | 0      | 0      | C | -1.435 | 0      | 0      |
| C | 0.722  | -1.241 | 0.016  | C | -0.722 | -1.243 | -0.027 |
| C | 1.465  | 2.433  | -0.129 | C | -1.462 | 2.43   | 0.169  |
| C | 2.851  | 2.459  | 0.007  | C | -2.851 | 2.463  | 0.036  |
| C | 3.542  | 1.239  | 0.282  | C | -3.542 | 1.244  | -0.266 |
| C | 2.863  | 0      | 0      | C | -2.858 | 0      | 0      |
| C | 3.542  | -1.239 | -0.282 | C | -3.542 | -1.244 | 0.266  |
| C | 2.851  | -2.459 | -0.007 | C | -2.851 | -2.463 | -0.036 |
| C | 1.465  | -2.433 | 0.129  | C | -1.462 | -2.43  | -0.169 |
| C | -3.071 | 4.848  | 0.732  | C | 3.04   | 4.875  | -0.722 |
| C | -3.626 | 3.696  | 0.137  | C | 3.618  | 3.695  | -0.173 |
| C | -4.988 | 3.722  | -0.264 | C | 4.978  | 3.715  | 0.202  |
| C | -5.74  | 4.891  | -0.025 | C | 5.752  | 4.912  | 0.052  |
| C | -5.172 | 6.013  | 0.559  | C | 5.143  | 6.076  | -0.512 |
| C | -3.824 | 5.994  | 0.935  | C | 3.773  | 6.017  | -0.893 |
| C | -5.557 | 2.552  | -0.938 | C | 7.12   | 4.962  | 0.463  |
| C | -6.788 | 2.619  | -1.62  | C | 7.828  | 6.152  | 0.269  |
| C | -4.838 | 1.321  | -0.938 | C | 7.23   | 7.283  | -0.302 |
| C | -5.371 | 0.234  | -1.674 | C | 5.904  | 7.253  | -0.684 |
| C | -6.582 | 0.326  | -2.331 | C | 5.581  | 2.541  | 0.781  |
| C | -7.308 | 1.526  | -2.294 | C | 6.931  | 2.599  | 1.254  |
| C | -5.371 | -0.234 | 1.674  | C | 7.722  | 3.779  | 1.089  |
| C | -4.838 | -1.321 | 0.938  | C | 4.846  | 1.331  | 0.865  |
| C | -5.557 | -2.552 | 0.938  | C | 5.419  | 0.24   | 1.597  |
| C | -6.788 | -2.619 | 1.62   | C | 6.687  | 0.297  | 2.085  |
| C | -7.308 | -1.526 | 2.294  | C | 7.505  | 1.453  | 1.889  |
| C | -6.582 | -0.326 | 2.331  | C | 8.838  | 1.491  | 2.33   |
| C | -4.988 | -3.722 | 0.264  | C | 9.602  | 2.633  | 2.149  |
| C | -5.74  | -4.891 | 0.025  | C | 9.048  | 3.761  | 1.538  |
| C | -3.626 | -3.696 | -0.137 | C | 5.419  | -0.24  | -1.597 |

|   |        |        |        |   |        |        |        |
|---|--------|--------|--------|---|--------|--------|--------|
| C | -3.071 | -4.848 | -0.732 | C | 4.846  | -1.331 | -0.865 |
| C | -3.824 | -5.994 | -0.935 | C | 5.581  | -2.541 | -0.781 |
| C | -5.172 | -6.013 | -0.559 | C | 6.931  | -2.599 | -1.254 |
| C | 3.071  | 4.848  | -0.732 | C | 7.505  | -1.453 | -1.889 |
| C | 3.626  | 3.696  | -0.137 | C | 6.687  | -0.297 | -2.085 |
| C | 4.988  | 3.722  | 0.264  | C | 7.722  | -3.779 | -1.089 |
| C | 5.74   | 4.891  | 0.025  | C | 9.048  | -3.761 | -1.538 |
| C | 5.172  | 6.013  | -0.559 | C | 9.602  | -2.633 | -2.149 |
| C | 3.824  | 5.993  | -0.935 | C | 8.838  | -1.491 | -2.33  |
| C | 5.557  | 2.552  | 0.938  | C | 4.979  | -3.715 | -0.202 |
| C | 6.788  | 2.619  | 1.62   | C | 5.752  | -4.912 | -0.052 |
| C | 4.838  | 1.321  | 0.938  | C | 7.12   | -4.962 | -0.463 |
| C | 5.371  | 0.234  | 1.674  | C | 3.618  | -3.695 | 0.173  |
| C | 6.582  | 0.326  | 2.331  | C | 3.04   | -4.875 | 0.722  |
| C | 7.308  | 1.526  | 2.294  | C | 3.773  | -6.017 | 0.893  |
| C | 3.071  | -4.848 | 0.732  | C | 5.143  | -6.076 | 0.512  |
| C | 3.626  | -3.696 | 0.137  | C | 5.904  | -7.253 | 0.684  |
| C | 4.988  | -3.722 | -0.264 | C | 7.23   | -7.283 | 0.302  |
| C | 5.74   | -4.891 | -0.025 | C | 7.829  | -6.152 | -0.269 |
| C | 5.172  | -6.013 | 0.558  | C | -3.04  | 4.875  | 0.722  |
| C | 3.824  | -5.994 | 0.935  | C | -3.618 | 3.695  | 0.173  |
| C | 5.557  | -2.552 | -0.938 | C | -4.979 | 3.715  | -0.202 |
| C | 6.788  | -2.619 | -1.62  | C | -5.752 | 4.912  | -0.052 |
| C | 4.838  | -1.321 | -0.938 | C | -5.143 | 6.076  | 0.513  |
| C | 5.371  | -0.234 | -1.674 | C | -3.773 | 6.017  | 0.893  |
| C | 6.582  | -0.326 | -2.331 | C | -7.12  | 4.962  | -0.463 |
| C | 7.308  | -1.526 | -2.294 | C | -7.829 | 6.152  | -0.269 |
| H | -0.938 | 3.362  | 0.293  | C | -7.23  | 7.283  | 0.302  |
| H | -0.938 | -3.362 | -0.293 | C | -5.904 | 7.253  | 0.684  |
| H | 0.938  | 3.362  | -0.293 | C | -5.581 | 2.541  | -0.781 |

|   |        |        |        |   |        |        |        |
|---|--------|--------|--------|---|--------|--------|--------|
| H | 0.938  | -3.362 | 0.293  | C | -6.931 | 2.599  | -1.254 |
| H | -2.043 | 4.833  | 1.079  | C | -7.722 | 3.779  | -1.089 |
| H | -6.792 | 4.915  | -0.284 | C | -4.846 | 1.331  | -0.865 |
| H | -5.778 | 6.897  | 0.734  | C | -5.419 | 0.24   | -1.597 |
| H | -3.373 | 6.862  | 1.406  | C | -6.687 | 0.297  | -2.085 |
| H | -7.334 | 3.555  | -1.65  | C | -7.505 | 1.453  | -1.889 |
| H | -4.803 | -0.685 | -1.741 | C | -8.838 | 1.491  | -2.33  |
| H | -6.958 | -0.525 | -2.89  | C | -9.602 | 2.633  | -2.149 |
| H | -8.257 | 1.61   | -2.814 | C | -9.048 | 3.761  | -1.538 |
| H | -4.803 | 0.685  | 1.741  | C | -3.04  | -4.875 | -0.722 |
| H | -7.334 | -3.555 | 1.65   | C | -3.618 | -3.695 | -0.173 |
| H | -8.257 | -1.61  | 2.814  | C | -4.978 | -3.715 | 0.202  |
| H | -6.958 | 0.526  | 2.89   | C | -5.752 | -4.912 | 0.052  |
| H | -6.792 | -4.915 | 0.284  | C | -5.143 | -6.076 | -0.512 |
| H | -2.043 | -4.833 | -1.079 | C | -3.773 | -6.017 | -0.893 |
| H | -3.373 | -6.862 | -1.406 | C | -7.12  | -4.962 | 0.463  |
| H | -5.778 | -6.897 | -0.734 | C | -7.828 | -6.152 | 0.269  |
| H | 2.043  | 4.832  | -1.079 | C | -7.23  | -7.283 | -0.301 |
| H | 6.792  | 4.915  | 0.284  | C | -5.904 | -7.253 | -0.684 |
| H | 5.778  | 6.897  | -0.734 | C | -5.581 | -2.541 | 0.781  |
| H | 3.373  | 6.862  | -1.406 | C | -6.931 | -2.599 | 1.254  |
| H | 7.334  | 3.555  | 1.65   | C | -7.722 | -3.779 | 1.089  |
| H | 4.803  | -0.685 | 1.741  | C | -4.846 | -1.331 | 0.865  |
| H | 6.958  | -0.525 | 2.89   | C | -5.419 | -0.24  | 1.597  |
| H | 8.257  | 1.61   | 2.814  | C | -6.687 | -0.297 | 2.085  |
| H | 2.043  | -4.833 | 1.078  | C | -7.505 | -1.453 | 1.889  |
| H | 6.792  | -4.915 | -0.284 | C | -8.838 | -1.491 | 2.33   |
| H | 5.778  | -6.897 | 0.733  | C | -9.602 | -2.633 | 2.149  |
| H | 3.373  | -6.862 | 1.406  | C | -9.048 | -3.761 | 1.538  |
| H | 7.334  | -3.555 | -1.65  | H | 0.93   | 3.352  | -0.355 |

|   |       |       |        |   |        |        |        |
|---|-------|-------|--------|---|--------|--------|--------|
| H | 4.803 | 0.685 | -1.741 | H | 0.93   | -3.352 | 0.355  |
| H | 6.958 | 0.526 | -2.89  | H | -0.93  | 3.352  | 0.355  |
| H | 8.257 | -1.61 | -2.814 | H | -0.93  | -3.353 | -0.355 |
|   |       |       |        | H | 2.008  | 4.864  | -1.051 |
|   |       |       |        | H | 3.316  | 6.899  | -1.334 |
|   |       |       |        | H | 8.868  | 6.221  | 0.566  |
|   |       |       |        | H | 7.817  | 8.187  | -0.434 |
|   |       |       |        | H | 5.43   | 8.129  | -1.118 |
|   |       |       |        | H | 4.819  | -0.644 | 1.77   |
|   |       |       |        | H | 7.097  | -0.543 | 2.639  |
|   |       |       |        | H | 9.26   | 0.613  | 2.812  |
|   |       |       |        | H | 10.634 | 2.659  | 2.484  |
|   |       |       |        | H | 9.674  | 4.637  | 1.419  |
|   |       |       |        | H | 4.819  | 0.644  | -1.77  |
|   |       |       |        | H | 7.097  | 0.543  | -2.639 |
|   |       |       |        | H | 9.674  | -4.637 | -1.418 |
|   |       |       |        | H | 10.634 | -2.659 | -2.484 |
|   |       |       |        | H | 9.26   | -0.613 | -2.812 |
|   |       |       |        | H | 2.008  | -4.864 | 1.051  |
|   |       |       |        | H | 3.316  | -6.899 | 1.334  |
|   |       |       |        | H | 5.43   | -8.129 | 1.118  |
|   |       |       |        | H | 7.817  | -8.187 | 0.434  |
|   |       |       |        | H | 8.868  | -6.221 | -0.566 |
|   |       |       |        | H | -2.008 | 4.864  | 1.051  |
|   |       |       |        | H | -3.316 | 6.899  | 1.334  |
|   |       |       |        | H | -8.868 | 6.221  | -0.566 |
|   |       |       |        | H | -7.817 | 8.187  | 0.434  |
|   |       |       |        | H | -5.43  | 8.129  | 1.118  |
|   |       |       |        | H | -4.819 | -0.644 | -1.77  |
|   |       |       |        | H | -7.097 | -0.543 | -2.639 |

|   |         |        |        |
|---|---------|--------|--------|
| H | -9.26   | 0.613  | -2.812 |
| H | -10.634 | 2.659  | -2.484 |
| H | -9.674  | 4.637  | -1.418 |
| H | -2.008  | -4.864 | -1.051 |
| H | -3.316  | -6.899 | -1.334 |
| H | -8.868  | -6.221 | 0.566  |
| H | -7.817  | -8.187 | -0.434 |
| H | -5.43   | -8.129 | -1.118 |
| H | -4.819  | 0.644  | 1.77   |
| H | -7.097  | 0.543  | 2.639  |
| H | -9.26   | -0.613 | 2.812  |
| H | -10.634 | -2.659 | 2.484  |
| H | -9.674  | -4.637 | 1.419  |

---
